# Supplementary material
Source: MDPI journal article supplement (https://www.mdpi.com/2673-401X/3/4/25)
Supplement: s1 [file s1]

# Supplementary Materials

## Theoretical Study on the Diels–Alder Reaction of Fullerenes: Analysis of Isomerism, Aromaticity, and Solvation

Diogo J. L. Rodrigues <sup>1</sup>, Luís M. N. B. F. Santos <sup>1</sup>, André Melo <sup>2</sup> and Carlos F. R. A. C. Lima <sup>1,\*</sup>

<sup>1</sup> Centro de Investigação em Química da Universidade do Porto, Department of Chemistry and Biochemistry, Faculty of Science, Institute of Molecular Sciences (IMS), University of Porto, Rua do Campo Alegre, P4169-007 Porto, Portugal

<sup>2</sup> Laboratório Associado para a Química Verde-REQUIMTE, Department of Chemistry and Biochemistry, Faculty of Science, University of Porto, Rua do Campo Alegre, P4169-007 Porto, Portugal

\* Correspondence: carlos.lima@fc.up.pt

**Table S1.** Electronic energies obtained (in vacuum) for the various species studied at different theoretical levels. M06-2X/6-311++G(2d,p), B3LYP/6-31+G(d), and MP2/cc-pVDZ are single point energy calculations on the optimized M06-2X/6-31+G(d) geometries.

| Species                        | $E_{el}$ / Hartree   |                           |                     |                                |
|--------------------------------|----------------------|---------------------------|---------------------|--------------------------------|
|                                | M06-2X/<br>6-31+G(d) | M06-2X/<br>6-311++G(2d,p) | B3LYP/<br>6-31+G(d) | MP2/<br>cc-pVDZ <sup>1</sup>   |
| anthracene                     | -539.308194          | -539.444350               | -539.548294         | -537.848034<br>(-536.038262)   |
| indene                         | -347.614828          | -347.704859               | -347.775603         | -                              |
| C <sub>60</sub>                | -2285.492704         | -2285.994963              | -2286.220335        | -2279.675979<br>(-2271.964664) |
| AC <sub>60</sub> MA            | -2824.837241         | -2825.471834              | -2825.765670        | -2817.587061<br>(-2808.014434) |
| C <sub>70</sub>                | -2666.503092         | -2667.089136              | -2667.356359        | -                              |
| AIC <sub>70</sub> MA <i>a</i>  | -3205.848078         | -3206.566391              | -3206.901523        | -                              |
| AIC <sub>70</sub> MA <i>b</i>  | -3205.846171         | -3206.564118              | -3206.896679        | -                              |
| AIC <sub>70</sub> MA <i>c</i>  | -3205.818709         | -                         | -                   | -                              |
| AIC <sub>70</sub> MA <i>d</i>  | -3205.774922         | -                         | -                   | -                              |
| ICMA                           | -2633.151952         | -2633.740334              | -2634.007738        | -                              |
| AICBA <i>trans</i> -1          | -3172.494885         | -3173.215574              | -3173.550477        | -                              |
| AICBA <i>trans</i> -2 <i>a</i> | -3172.495132         | -                         | -                   | -                              |
| AICBA <i>trans</i> -2 <i>b</i> | -3172.495216         | -                         | -                   | -                              |
| AICBA <i>trans</i> -3 <i>a</i> | -3172.496658         | -                         | -                   | -                              |
| AICBA <i>trans</i> -3 <i>b</i> | -3172.496348         | -3173.217473              | -3173.552751        | -                              |
| AICBA <i>trans</i> -4 <i>a</i> | -3172.494920         | -                         | -                   | -                              |
| AICBA <i>trans</i> -4 <i>b</i> | -3172.494882         | -                         | -                   | -                              |
| AICBA <i>e</i> -face <i>a</i>  | -3172.496894         | -3173.217558              | -3173.552494        | -                              |
| AICBA <i>e</i> -face <i>b</i>  | -3172.496743         | -                         | -                   | -                              |
| AICBA <i>e</i> -edge           | -3172.496762         | -                         | -                   | -                              |
| AICBA <i>cis</i> -3 <i>a</i>   | -3172.490488         | -                         | -                   | -                              |
| AICBA <i>cis</i> -3 <i>b</i>   | -3172.490574         | -                         | -                   | -                              |
| AICBA <i>cis</i> -2 <i>a</i>   | -3172.489805         | -                         | -                   | -                              |
| AICBA <i>cis</i> -2 <i>b</i>   | -3172.484859         | -3173.210505              | -3173.543610        | -                              |

<sup>1</sup> The calculated Hartree-Fock energy is shown in parenthesis.

**Table S2.** Electronic energies obtained for the species in *m*-xylene, simulated using SMD – Solvent Model based on Density. The energies were obtained through single point calculations on the optimized geometries obtained in vacuum, at the M06-2X/6-31+G(d) level. For a few representative molecules the geometries were reoptimized in solution using the same level of theory.

| Species                        | $E_{el}^{m-xylene}$ (single point) /<br>Hartree | $E_{el}^{m-xylene}$ (opt in <i>m</i> – xylene) /<br>Hartree |
|--------------------------------|-------------------------------------------------|-------------------------------------------------------------|
| anthracene                     | -539.324296                                     | -539.324302                                                 |
| indene                         | -347.626159                                     | -347.626165                                                 |
| C <sub>60</sub>                | -2285.548057                                    | -2285.548311                                                |
| AC <sub>60</sub> MA            | -2824.900524                                    | -2824.900552                                                |
| C <sub>70</sub>                | -2666.565639                                    | -2666.565789                                                |
| AIC <sub>70</sub> MA <i>a</i>  | -3205.919287                                    | -3205.919317                                                |
| AIC <sub>70</sub> MA <i>b</i>  | -3205.917180                                    | -                                                           |
| ICMA                           | -2633.211855                                    | -2633.211890                                                |
| AICBA <i>trans</i> -1          | -3172.563408                                    | -                                                           |
| AICBA <i>trans</i> -2 <i>a</i> | -3172.564002                                    | -                                                           |
| AICBA <i>trans</i> -2 <i>b</i> | -3172.563872                                    | -                                                           |
| AICBA <i>trans</i> -3 <i>a</i> | -3172.565535                                    | -                                                           |
| AICBA <i>trans</i> -3 <i>b</i> | -3172.565046                                    | -                                                           |
| AICBA <i>trans</i> -4 <i>a</i> | -3172.563268                                    | -                                                           |
| AICBA <i>trans</i> -4 <i>b</i> | -3172.565046                                    | -                                                           |
| AICBA <i>e</i> -face <i>a</i>  | -3172.565521                                    | -3172.565551                                                |
| AICBA <i>e</i> -face <i>b</i>  | -3172.565133                                    | -                                                           |
| AICBA <i>e</i> -edge           | -3172.565868                                    | -                                                           |
| AICBA <i>cis</i> -3 <i>a</i>   | -3172.559316                                    | -                                                           |
| AICBA <i>cis</i> -3 <i>b</i>   | -3172.558671                                    | -                                                           |
| AICBA <i>cis</i> -2 <i>a</i>   | -3172.558345                                    | -                                                           |
| AICBA <i>cis</i> -2 <i>b</i>   | -3172.552854                                    | -                                                           |

**Table S3** Thermal corrections to enthalpy (including ZPE) from  $T = 0$  to 298.15 K,  $\Delta H_{thermal}$ , and absolute enthalpies, at  $T = 298.15$  K, obtained from optimization and frequencies calculations for the various species using M06-2X/6-31+G(d).

| Species                         | $\Delta H_{thermal}$ / Hartree | $H(T = 298.15 \text{ K})$ / Hartree |
|---------------------------------|--------------------------------|-------------------------------------|
| Indene                          | 0.150539                       | -347.4642888                        |
| Anthracene                      | 0.206977                       | -539.1012174                        |
| C <sub>60</sub>                 | 0.399011                       | -2285.093693                        |
| C <sub>70</sub>                 | 0.465784                       | -2666.037308                        |
| IC <sub>60</sub> MA             | 0.553810                       | -2632.598142                        |
| AC <sub>60</sub> MA             | 0.609736                       | -2824.227505                        |
| AC <sub>70</sub> MA <i>a</i>    | 0.678131                       | -3205.169947                        |
| AIC60BA <i>e</i> -face <i>a</i> | 0.766103                       | -3171.730791                        |

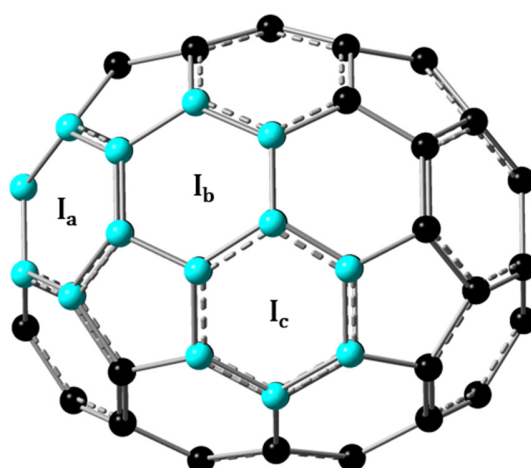

**Figure S1.** Designated types of hexagons in C<sub>70</sub>. The same logic applies to Type-II hexagons, except they are adjacent to an addend.

**Table S4.** HOMA analysis, decomposed in EN and GEO values, for the hexagon rings in C<sub>60</sub> and C<sub>70</sub>, and hexagons adjacent to the addends in the respective adducts.

| Species                          | EN    | GEO   | HOMA  | Ring Type |
|----------------------------------|-------|-------|-------|-----------|
| C <sub>60</sub> <sup>1</sup>     | 0.267 | 0.529 | 0.204 | I         |
| AC <sub>60</sub> MA <sup>2</sup> | 0.158 | 0.368 | 0.474 | II        |
| IC <sub>60</sub> MA              | 0.162 | 0.363 | 0.475 | II        |
|                                  | 0.162 | 0.363 | 0.475 | II        |
|                                  | 0.163 | 0.369 | 0.468 | II        |
|                                  | 0.163 | 0.369 | 0.468 | II        |
| AICBA <i>trans</i> -1            | 0.161 | 0.349 | 0.490 | II        |
|                                  | 0.161 | 0.349 | 0.490 | II        |
|                                  | 0.158 | 0.355 | 0.488 | II        |
|                                  | 0.158 | 0.355 | 0.488 | II        |
|                                  | 0.165 | 0.364 | 0.470 | II        |
|                                  | 0.165 | 0.364 | 0.470 | II        |
|                                  | 0.156 | 0.349 | 0.495 | II        |
|                                  | 0.156 | 0.349 | 0.495 | II        |
| AICBA <i>trans</i> -2 <i>a</i>   | 0.159 | 0.351 | 0.490 | II        |
|                                  | 0.174 | 0.382 | 0.444 | II        |
|                                  | 0.155 | 0.353 | 0.492 | II        |
|                                  | 0.165 | 0.373 | 0.462 | II        |
|                                  | 0.159 | 0.349 | 0.492 | II        |
|                                  | 0.166 | 0.359 | 0.475 | II        |
|                                  | 0.165 | 0.366 | 0.469 | II        |
|                                  | 0.162 | 0.371 | 0.467 | II        |
| AICBA <i>trans</i> -2 <i>b</i>   | 0.162 | 0.366 | 0.472 | II        |
|                                  | 0.169 | 0.379 | 0.453 | II        |
|                                  | 0.170 | 0.370 | 0.460 | II        |
|                                  | 0.164 | 0.347 | 0.489 | II        |
|                                  | 0.160 | 0.369 | 0.472 | II        |
|                                  | 0.155 | 0.352 | 0.493 | II        |
|                                  | 0.164 | 0.373 | 0.463 | II        |
|                                  | 0.160 | 0.349 | 0.491 | II        |
| AICBA <i>trans</i> -3 <i>a</i>   | 0.170 | 0.371 | 0.459 | II        |
|                                  | 0.176 | 0.388 | 0.436 | II        |
|                                  | 0.170 | 0.375 | 0.455 | II        |
|                                  | 0.163 | 0.346 | 0.491 | II        |
|                                  | 0.182 | 0.392 | 0.426 | II        |
|                                  | 0.160 | 0.357 | 0.483 | II        |
|                                  | 0.157 | 0.345 | 0.498 | II        |
|                                  | 0.164 | 0.367 | 0.469 | II        |
| AICBA <i>trans</i> -3 <i>b</i>   | 0.167 | 0.365 | 0.469 | II        |
|                                  | 0.167 | 0.361 | 0.472 | II        |
|                                  | 0.164 | 0.356 | 0.479 | II        |
|                                  | 0.187 | 0.403 | 0.410 | II        |
|                                  | 0.162 | 0.366 | 0.471 | II        |
|                                  | 0.161 | 0.358 | 0.481 | II        |
|                                  | 0.154 | 0.344 | 0.502 | II        |
|                                  | 0.176 | 0.387 | 0.437 | II        |
| AICBA <i>trans</i> -4 <i>a</i>   | 0.080 | 0.217 | 0.703 | III       |
|                                  | 0.160 | 0.363 | 0.477 | II        |

|                                |       |       |        |     |
|--------------------------------|-------|-------|--------|-----|
|                                | 0.173 | 0.377 | 0.449  | II  |
|                                | 0.168 | 0.377 | 0.454  | II  |
|                                | 0.160 | 0.363 | 0.477  | II  |
|                                | 0.152 | 0.353 | 0.495  | II  |
|                                | 0.163 | 0.381 | 0.456  | II  |
| AICBA <i>trans</i> -4 <i>b</i> | 0.083 | 0.228 | 0.690  | III |
|                                | 0.165 | 0.378 | 0.457  | II  |
|                                | 0.163 | 0.384 | 0.454  | II  |
|                                | 0.165 | 0.378 | 0.457  | II  |
|                                | 0.175 | 0.391 | 0.434  | II  |
|                                | 0.157 | 0.351 | 0.492  | II  |
|                                | 0.169 | 0.384 | 0.448  | II  |
| AICBA <i>e</i> -face <i>a</i>  | 0.084 | 0.222 | 0.694  | III |
|                                | 0.084 | 0.222 | 0.694  | III |
|                                | 0.161 | 0.365 | 0.474  | II  |
|                                | 0.161 | 0.365 | 0.474  | II  |
|                                | 0.156 | 0.347 | 0.497  | II  |
|                                | 0.156 | 0.347 | 0.497  | II  |
| AICBA <i>e</i> -face <i>b</i>  | 0.086 | 0.232 | 0.682  | III |
|                                | 0.086 | 0.232 | 0.682  | III |
|                                | 0.159 | 0.354 | 0.487  | II  |
|                                | 0.159 | 0.354 | 0.487  | II  |
|                                | 0.160 | 0.359 | 0.481  | II  |
|                                | 0.160 | 0.359 | 0.481  | II  |
| AICBA <i>e</i> -edge           | 0.084 | 0.220 | 0.696  | III |
|                                | 0.086 | 0.232 | 0.682  | III |
|                                | 0.164 | 0.362 | 0.474  | II  |
|                                | 0.165 | 0.353 | 0.483  | II  |
|                                | 0.155 | 0.361 | 0.484  | II  |
|                                | 0.154 | 0.357 | 0.489  | II  |
| C <sub>70</sub> <sup>3</sup>   | 0.219 | 0.462 | 0.319  | Ia  |
|                                | 0.473 | 0.705 | -0.177 | Ib  |
|                                | 0.253 | 0.259 | 0.489  | Ic  |
| AIC <sub>70</sub> MA <i>a</i>  | 0.126 | 0.299 | 0.575  | IIa |
|                                | 0.126 | 0.299 | 0.575  | IIa |
|                                | 0.330 | 0.585 | 0.085  | IIb |
|                                | 0.330 | 0.585 | 0.085  | IIb |
| AIC <sub>70</sub> MA <i>b</i>  | 0.118 | 0.306 | 0.576  | IIa |
|                                | 0.118 | 0.306 | 0.576  | IIa |
|                                | 0.178 | 0.199 | 0.624  | IIc |
|                                | 0.178 | 0.199 | 0.624  | IIc |

<sup>1</sup> All 20 hexagons are equivalent.

<sup>2</sup> All 4 four hexagons adjacent to the addend are equivalent.

<sup>3</sup> Ia and Ib hexagons exist in 10 equivalent unities and Ic rings in 5 equivalent unities.

Table S5. M06-2X/6-31+G(d) optimized geometries.

Anthracene

| Center<br>Number | Atomic<br>Number | Atomic<br>Type | Coordinates (Angstroms) |           |           |
|------------------|------------------|----------------|-------------------------|-----------|-----------|
|                  |                  |                | X                       | Y         | Z         |
| 1                | 6                | 0              | 3.652663                | 0.714593  | -0.000019 |
| 2                | 6                | 0              | 2.475821                | 1.405672  | 0.000041  |
| 3                | 6                | 0              | 1.219600                | 0.718406  | 0.000033  |
| 4                | 6                | 0              | 1.219602                | -0.718405 | 0.000018  |
| 5                | 6                | 0              | 2.475822                | -1.405671 | -0.000018 |
| 6                | 6                | 0              | 3.652664                | -0.714592 | -0.000058 |
| 7                | 6                | 0              | 0.000000                | 1.400640  | 0.000026  |
| 8                | 6                | 0              | 0.000001                | -1.400641 | 0.000027  |
| 9                | 6                | 0              | -1.219601               | -0.718406 | 0.000022  |
| 10               | 6                | 0              | -1.219602               | 0.718405  | 0.000010  |
| 11               | 6                | 0              | -2.475821               | 1.405671  | -0.000025 |
| 12               | 1                | 0              | -2.470912               | 2.493147  | -0.000062 |
| 13               | 6                | 0              | -3.652663               | 0.714592  | -0.000054 |
| 14               | 6                | 0              | -3.652663               | -0.714592 | -0.000008 |
| 15               | 6                | 0              | -2.475821               | -1.405672 | 0.000027  |
| 16               | 1                | 0              | -0.000005               | 2.489468  | 0.000039  |
| 17               | 1                | 0              | 4.598900                | 1.247714  | -0.000049 |
| 18               | 1                | 0              | 2.470909                | 2.493147  | 0.000087  |
| 19               | 1                | 0              | 2.470910                | -2.493147 | -0.000025 |
| 20               | 1                | 0              | 4.598897                | -1.247719 | -0.000116 |
| 21               | 1                | 0              | -0.000003               | -2.489468 | 0.000042  |
| 22               | 1                | 0              | -4.598898               | 1.247718  | -0.000086 |
| 23               | 1                | 0              | -4.598898               | -1.247718 | -0.000025 |
| 24               | 1                | 0              | -2.470913               | -2.493147 | 0.000064  |

Indene

| Center<br>Number | Atomic<br>Number | Atomic<br>Type | Coordinates (Angstroms) |           |           |
|------------------|------------------|----------------|-------------------------|-----------|-----------|
|                  |                  |                | X                       | Y         | Z         |
| 1                | 6                | 0              | -0.229273               | -0.686185 | 0.000045  |
| 2                | 6                | 0              | -1.663420               | -1.156195 | 0.000032  |
| 3                | 6                | 0              | -0.211136               | 0.720159  | -0.000036 |
| 4                | 6                | 0              | -2.436045               | 0.140941  | 0.000024  |
| 5                | 6                | 0              | -1.601730               | 1.194800  | -0.000163 |
| 6                | 6                | 0              | 0.955768                | -1.408064 | 0.000094  |
| 7                | 6                | 0              | 0.997046                | 1.414277  | -0.000058 |
| 8                | 6                | 0              | 2.168267                | -0.712014 | 0.000067  |
| 9                | 6                | 0              | 2.186769                | 0.684998  | -0.000008 |
| 10               | 1                | 0              | -1.896160               | -1.768092 | -0.881467 |
| 11               | 1                | 0              | -1.896149               | -1.767921 | 0.881654  |
| 12               | 1                | 0              | -3.519346               | 0.186958  | 0.000044  |
| 13               | 1                | 0              | -1.890978               | 2.240588  | -0.000263 |
| 14               | 1                | 0              | 0.946677                | -2.495516 | 0.000143  |
| 15               | 1                | 0              | 1.014951                | 2.501053  | -0.000137 |
| 16               | 1                | 0              | 3.104918                | -1.261990 | 0.000090  |
| 17               | 1                | 0              | 3.138628                | 1.208614  | -0.000040 |

C<sub>60</sub>

| Center<br>Number | Atomic<br>Number | Atomic<br>Type | Coordinates (Angstroms) |           |           |
|------------------|------------------|----------------|-------------------------|-----------|-----------|
|                  |                  |                | X                       | Y         | Z         |
| 1                | 6                | 0              | 2.922830                | -1.753120 | -0.959790 |
| 2                | 6                | 0              | 3.240993                | -0.397478 | -1.370838 |
| 3                | 6                | 0              | 3.468725                | 0.582444  | -0.414105 |
| 4                | 6                | 0              | 3.388865                | 0.251837  | 0.997712  |
| 5                | 6                | 0              | 3.085783                | -1.044804 | 1.390662  |
| 6                | 6                | 0              | 2.847166                | -2.069469 | 0.389655  |
| 7                | 6                | 0              | 1.939362                | -2.283939 | -1.886619 |
| 8                | 6                | 0              | 1.649904                | -1.256635 | -2.870820 |
| 9                | 6                | 0              | 2.453940                | -0.090174 | -2.551636 |
| 10               | 6                | 0              | 1.928901                | 1.183238  | -2.723839 |
| 11               | 6                | 0              | 2.919433                | 1.914396  | -0.594194 |
| 12               | 6                | 0              | 2.789966                | 1.379089  | 1.689995  |
| 13               | 6                | 0              | 1.913369                | 1.160776  | 2.744289  |
| 14               | 6                | 0              | 1.595928                | -0.195325 | 3.154159  |
| 15               | 6                | 0              | 2.169032                | -1.273392 | 2.493286  |
| 16               | 6                | 0              | 1.364526                | -2.439438 | 2.174214  |
| 17               | 6                | 0              | 1.784002                | -2.931546 | 0.874419  |
| 18               | 6                | 0              | 0.843336                | -3.439273 | -0.011656 |
| 19               | 6                | 0              | 0.922899                | -3.108257 | -1.423087 |
| 20               | 6                | 0              | 0.355759                | -1.098126 | -3.347041 |
| 21               | 6                | 0              | -0.707340               | -1.960557 | -2.863109 |
| 22               | 6                | 0              | -0.430401               | -2.943371 | -1.922390 |
| 23               | 6                | 0              | -1.346698               | -3.170435 | -0.819052 |
| 24               | 6                | 0              | -0.559372               | -3.477467 | 0.361486  |
| 25               | 6                | 0              | -0.960482               | -3.007300 | 1.604720  |
| 26               | 6                | 0              | 0.023023                | -2.476014 | 2.530920  |
| 27               | 6                | 0              | -0.575293               | -1.348865 | 3.222907  |
| 28               | 6                | 0              | 0.193480                | -0.233921 | 3.526741  |
| 29               | 6                | 0              | 2.499845                | 2.406197  | 0.705620  |
| 30               | 6                | 0              | -1.939363               | 2.283939  | 1.886618  |
| 31               | 6                | 0              | -0.922900               | 3.108256  | 1.423085  |
| 32               | 6                | 0              | -0.843336               | 3.439272  | 0.011657  |
| 33               | 6                | 0              | -1.784003               | 2.931546  | -0.874419 |
| 34               | 6                | 0              | -2.847166               | 2.069470  | -0.389656 |
| 35               | 6                | 0              | -3.240993               | 0.397478  | 1.370838  |
| 36               | 6                | 0              | -2.453939               | 0.090174  | 2.551637  |
| 37               | 6                | 0              | -1.649904               | 1.256633  | 2.870820  |
| 38               | 6                | 0              | -0.355760               | 1.098125  | 3.347042  |
| 39               | 6                | 0              | 0.707342                | 1.960557  | 2.863109  |
| 40               | 6                | 0              | 0.430403                | 2.943371  | 1.922389  |
| 41               | 6                | 0              | 0.559372                | 3.477466  | -0.361486 |
| 42               | 6                | 0              | 0.960482                | 3.007300  | -1.604719 |
| 43               | 6                | 0              | -0.023023               | 2.476013  | -2.530920 |
| 44               | 6                | 0              | -1.364527               | 2.439438  | -2.174215 |
| 45               | 6                | 0              | -2.169033               | 1.273394  | -2.493286 |
| 46               | 6                | 0              | -3.085783               | 1.044804  | -1.390663 |
| 47               | 6                | 0              | -3.388865               | -0.251836 | -0.997712 |
| 48               | 6                | 0              | -3.468725               | -0.582443 | 0.414106  |
| 49               | 6                | 0              | -1.928900               | -1.183239 | 2.723840  |
| 50               | 6                | 0              | -2.166995               | -2.208174 | 1.723380  |
| 51               | 6                | 0              | -2.919432               | -1.914396 | 0.594194  |
| 52               | 6                | 0              | -2.499844               | -2.406197 | -0.705618 |
| 53               | 6                | 0              | -2.789966               | -1.379088 | -1.689995 |
| 54               | 6                | 0              | -1.913369               | -1.160775 | -2.744288 |
| 55               | 6                | 0              | -1.595928               | 0.195325  | -3.154160 |
| 56               | 6                | 0              | -0.193481               | 0.233922  | -3.526741 |
| 57               | 6                | 0              | 0.575292                | 1.348866  | -3.222907 |
| 58               | 6                | 0              | 1.346698                | 3.170434  | 0.819053  |
| 59               | 6                | 0              | 2.166996                | 2.208173  | -1.723380 |
| 60               | 6                | 0              | -2.922829               | 1.753121  | 0.959790  |

|    |   |   |          |           |           |
|----|---|---|----------|-----------|-----------|
| 72 | 6 | 0 | 4.620942 | -1.229582 | 0.699655  |
| 73 | 6 | 0 | 3.976749 | 0.000024  | 1.292597  |
| 74 | 1 | 0 | 3.996015 | 0.000041  | 2.387284  |
| 75 | 6 | 0 | 4.620889 | 1.229631  | 0.699646  |
| 76 | 6 | 0 | 5.131145 | 2.313597  | 1.402697  |
| 77 | 1 | 0 | 5.117029 | 2.316585  | 2.490142  |
| 78 | 6 | 0 | 5.657710 | 3.397948  | 0.697026  |
| 79 | 1 | 0 | 6.065094 | 4.247200  | 1.237763  |
| 80 | 6 | 0 | 5.657739 | 3.397922  | -0.697054 |
| 81 | 1 | 0 | 6.065147 | 4.247155  | -1.237806 |
| 82 | 6 | 0 | 5.131291 | 2.313508  | -1.402721 |
| 83 | 1 | 0 | 5.117242 | 2.316469  | -2.490167 |
| 84 | 6 | 0 | 4.620959 | 1.229582  | -0.699669 |

## AC<sub>60</sub>MA

| Center<br>Number | Atomic<br>Number | Atomic<br>Type | Coordinates (Angstroms) |           |           |
|------------------|------------------|----------------|-------------------------|-----------|-----------|
|                  |                  |                | X                       | Y         | Z         |
| 1                | 6                | 0              | 2.467649                | -0.000003 | -0.800841 |
| 2                | 6                | 0              | 2.467647                | 0.000009  | 0.800840  |
| 3                | 6                | 0              | 1.709899                | 1.170131  | 1.427746  |
| 4                | 6                | 0              | 1.284379                | 2.277091  | 0.740834  |
| 5                | 6                | 0              | 1.284379                | 2.277079  | -0.740875 |
| 6                | 6                | 0              | 1.709906                | 1.170111  | -1.427771 |
| 7                | 6                | 0              | 0.966108                | 0.725386  | -2.573810 |
| 8                | 6                | 0              | 0.966107                | -0.725412 | -2.573794 |
| 9                | 6                | 0              | 1.709898                | -1.170124 | -1.427753 |
| 10               | 6                | 0              | 1.284383                | -2.277085 | -0.740838 |
| 11               | 6                | 0              | 1.284381                | -2.277070 | 0.740876  |
| 12               | 6                | 0              | 1.709901                | -1.170101 | 1.427775  |
| 13               | 6                | 0              | 0.966106                | -0.725369 | 2.573807  |
| 14               | 6                | 0              | 0.966108                | 0.725428  | 2.573796  |
| 15               | 6                | 0              | -0.150359               | 1.422936  | 3.026837  |
| 16               | 6                | 0              | -0.591442               | 2.590399  | 2.307782  |
| 17               | 6                | 0              | 0.110575                | 2.996514  | 1.175453  |
| 18               | 6                | 0              | -0.614117               | 3.442077  | -0.000030 |
| 19               | 6                | 0              | 0.110575                | 2.996493  | -1.175504 |
| 20               | 6                | 0              | -0.591442               | 2.590362  | -2.307827 |
| 21               | 6                | 0              | -0.150359               | 1.422886  | -3.026862 |
| 22               | 6                | 0              | -1.323346               | 0.693571  | -3.480309 |
| 23               | 6                | 0              | -1.323347               | -0.693617 | -3.480296 |
| 24               | 6                | 0              | -0.150359               | -1.422925 | -3.026836 |
| 25               | 6                | 0              | -0.591440               | -2.590386 | -2.307783 |
| 26               | 6                | 0              | 0.110576                | -2.996502 | -1.175452 |
| 27               | 6                | 0              | -0.614117               | -3.442067 | 0.000030  |
| 28               | 6                | 0              | 0.110576                | -2.996480 | 1.175502  |
| 29               | 6                | 0              | -0.591441               | -2.590348 | 2.307828  |
| 30               | 6                | 0              | -0.150360               | -1.422874 | 3.026861  |
| 31               | 6                | 0              | -1.323348               | -0.693558 | 3.480309  |
| 32               | 6                | 0              | -1.323347               | 0.693630  | 3.480297  |
| 33               | 6                | 0              | -2.495540               | 1.421129  | 3.031411  |
| 34               | 6                | 0              | -2.042018               | 2.594032  | 2.303320  |
| 35               | 6                | 0              | -2.732817               | 3.018828  | 1.175820  |
| 36               | 6                | 0              | -2.001908               | 3.459333  | -0.000030 |
| 37               | 6                | 0              | -2.732817               | 3.018808  | -1.175870 |
| 38               | 6                | 0              | -2.042018               | 2.593995  | -2.303364 |
| 39               | 6                | 0              | -2.495539               | 1.421079  | -3.031435 |
| 40               | 6                | 0              | -3.617801               | 0.726215  | -2.598740 |
| 41               | 6                | 0              | -3.617801               | -0.726248 | -2.598727 |
| 42               | 6                | 0              | -2.495540               | -1.421117 | -3.031412 |
| 43               | 6                | 0              | -2.042016               | -2.594019 | -2.303319 |
| 44               | 6                | 0              | -2.732815               | -3.018815 | -1.175820 |
| 45               | 6                | 0              | -2.001907               | -3.459319 | 0.000030  |
| 46               | 6                | 0              | -2.732816               | -3.018795 | 1.175871  |
| 47               | 6                | 0              | -2.042018               | -2.593981 | 2.303364  |
| 48               | 6                | 0              | -2.495541               | -1.421066 | 3.031436  |
| 49               | 6                | 0              | -3.617802               | -0.726203 | 2.598739  |
| 50               | 6                | 0              | -3.617802               | 0.726260  | 2.598727  |
| 51               | 6                | 0              | -4.339512               | 1.173923  | 1.422042  |
| 52               | 6                | 0              | -3.905450               | 2.295505  | 0.727063  |
| 53               | 6                | 0              | -3.905450               | 2.295492  | -0.727102 |
| 54               | 6                | 0              | -4.339511               | 1.173898  | -1.422063 |
| 55               | 6                | 0              | -4.786460               | 0.000001  | -0.694365 |
| 56               | 6                | 0              | -4.339513               | -1.173910 | -1.422042 |
| 57               | 6                | 0              | -3.905448               | -2.295491 | -0.727063 |
| 58               | 6                | 0              | -3.905448               | -2.295478 | 0.727101  |
| 59               | 6                | 0              | -4.339513               | -1.173886 | 1.422062  |
| 60               | 6                | 0              | -4.786460               | 0.000013  | 0.694364  |
| 61               | 6                | 0              | 3.976746                | -0.000012 | -1.292606 |
| 62               | 1                | 0              | 3.995995                | -0.000028 | -2.387293 |
| 63               | 6                | 0              | 4.620878                | -1.229634 | -0.699657 |
| 64               | 6                | 0              | 5.131062                | -2.313644 | -1.402693 |
| 65               | 1                | 0              | 5.116971                | -2.316652 | -2.490138 |
| 66               | 6                | 0              | 5.657456                | -3.398071 | -0.697009 |
| 67               | 1                | 0              | 6.064735                | -4.247372 | -1.237750 |
| 68               | 6                | 0              | 5.657534                | -3.398015 | 0.697070  |
| 69               | 1                | 0              | 6.064839                | -4.247292 | 1.237829  |
| 70               | 6                | 0              | 5.131162                | -2.313556 | 1.402721  |
| 71               | 1                | 0              | 5.117093                | -2.316499 | 2.490167  |

## C<sub>70</sub>

| Center<br>Number | Atomic<br>Number | Atomic<br>Type | Coordinates (Angstroms) |           |           |
|------------------|------------------|----------------|-------------------------|-----------|-----------|
|                  |                  |                | X                       | Y         | Z         |
| 1                | 6                | 0              | 1.201751                | 3.091604  | 1.547133  |
| 2                | 6                | 0              | 0.000205                | 3.441961  | 0.884986  |
| 3                | 6                | 0              | -1.201494               | 3.091714  | 1.546979  |
| 4                | 6                | 0              | -1.201400               | 2.204703  | 2.663771  |
| 5                | 6                | 0              | -0.000035               | 1.637623  | 3.152965  |
| 6                | 6                | 0              | 1.201688                | 2.204341  | 2.663699  |
| 7                | 6                | 0              | 2.440369                | 1.447541  | 2.635216  |
| 8                | 6                | 0              | 3.219795                | 1.882746  | 1.497261  |
| 9                | 6                | 0              | 2.440501                | 2.892961  | 0.816459  |
| 10               | 6                | 0              | 2.440786                | 2.953077  | -0.562238 |
| 11               | 6                | 0              | 1.201992                | 3.215218  | -1.273475 |
| 12               | 6                | 0              | 0.000184                | 3.505970  | -0.583464 |
| 13               | 6                | 0              | -1.201551               | 3.215279  | -1.273427 |
| 14               | 6                | 0              | -2.440079               | 2.953488  | -0.562471 |
| 15               | 6                | 0              | -2.440026               | 2.893103  | 0.816207  |
| 16               | 6                | 0              | -3.219629               | 1.883112  | 1.497279  |
| 17               | 6                | 0              | -2.440171               | 1.447798  | 2.635114  |
| 18               | 6                | 0              | -2.440212               | 0.117982  | 3.004049  |
| 19               | 6                | 0              | -1.201739               | -0.516110 | 3.418378  |
| 20               | 6                | 0              | -0.000063               | 0.221385  | 3.545606  |
| 21               | 6                | 0              | 1.201629                | -0.516185 | 3.418378  |
| 22               | 6                | 0              | 2.440141                | 0.117545  | 3.003885  |
| 23               | 6                | 0              | 3.219454                | -0.842420 | 2.253553  |
| 24               | 6                | 0              | 3.966919                | -0.432413 | 1.155980  |
| 25               | 6                | 0              | 3.966908                | 0.965438  | 0.767930  |
| 26               | 6                | 0              | 3.967283                | 1.028417  | -0.680749 |
| 27               | 6                | 0              | 3.220345                | 2.005798  | -1.327847 |
| 28               | 6                | 0              | 2.440418                | 1.670740  | -2.499156 |
| 29               | 6                | 0              | 1.201736                | 2.427147  | -2.462032 |
| 30               | 6                | 0              | 0.000159                | 1.905105  | -2.998832 |
| 31               | 6                | 0              | -1.201410               | 2.427208  | -2.462036 |
| 32               | 6                | 0              | -2.440134               | 1.670910  | -2.499127 |
| 33               | 6                | 0              | -3.220001               | 2.006204  | -1.328174 |
| 34               | 6                | 0              | -3.966873               | 1.028804  | -0.680689 |
| 35               | 6                | 0              | -3.966553               | 0.965832  | 0.767877  |
| 36               | 6                | 0              | -3.967178               | -0.431941 | 1.155913  |
| 37               | 6                | 0              | -3.219625               | -0.842144 | 2.253421  |
| 38               | 6                | 0              | -2.440478               | -2.059070 | 2.190516  |
| 39               | 6                | 0              | -1.202059               | -1.852208 | 2.919544  |
| 40               | 6                | 0              | -0.000123               | -2.492578 | 2.531963  |
| 41               | 6                | 0              | 1.201540                | -1.852357 | 2.919454  |
| 42               | 6                | 0              | 2.440244                | -2.059392 | 2.190703  |
| 43               | 6                | 0              | 2.440197                | -2.821589 | 1.039991  |
| 44               | 6                | 0              | 3.219380                | -2.404014 | -0.104560 |
| 45               | 6                | 0              | 3.966334                | -1.232904 | -0.053369 |
| 46               | 6                | 0              | 3.966915                | -0.330556 | -1.188261 |
| 47               | 6                | 0              | 3.220022                | -0.643527 | -2.317803 |
| 48               | 6                | 0              | 2.440307                | 0.377869  | -2.981647 |
| 49               | 6                | 0              | 1.201502                | -0.217464 | -3.450294 |
| 50               | 6                | 0              | 0.000071                | 0.528911  | -3.512929 |
| 51               | 6                | 0              | -1.201547               | -0.217248 | -3.450313 |
| 52               | 6                | 0              | -2.440233               | 0.378040  | -2.981761 |
| 53               | 6                | 0              | -3.219986               | -0.643144 | -2.317843 |
| 54               | 6                | 0              | -3.966875               | -0.329952 | -1.188269 |
| 55               | 6                | 0              | -3.966687               | -1.232597 | -0.053528 |
| 56               | 6                | 0              | -3.219789               | -2.403562 | -0.104581 |
| 57               | 6                | 0              | -2.440727               | -2.821462 | 1.040039  |
| 58               | 6                | 0              | -1.201749               | -3.411100 | 0.565324  |
| 59               | 6                | 0              | -0.000226               | -3.304117 | 1.306725  |
| 60               | 6                | 0              | 1.201179                | -3.411245 | 0.565287  |
| 61               | 6                | 0              | 1.201133                | -3.348915 | -0.859650 |
| 62               | 6                | 0              | 2.439833                | -2.719709 | -1.281142 |
| 63               | 6                | 0              | 2.440506                | -1.861000 | -2.361570 |
| 64               | 6                | 0              | 1.201564                | -1.591707 | -3.069492 |
| 65               | 6                | 0              | -0.000041               | -2.263768 | -2.793927 |
| 66               | 6                | 0              | -1.201630               | -1.591443 | -3.069724 |
| 67               | 6                | 0              | -2.440493               | -1.860634 | -2.361623 |
| 68               | 6                | 0              | -2.440271               | -2.719547 | -1.281323 |
| 69               | 6                | 0              | -1.201672               | -3.348769 | -0.859629 |
| 70               | 6                | 0              | -0.000233               | -3.178785 | -1.589228 |

AC<sub>70</sub>MA isomer a

| Center<br>Number | Atomic<br>Number | Atomic<br>Type | Coordinates (Angstroms) |           |           |
|------------------|------------------|----------------|-------------------------|-----------|-----------|
|                  |                  |                | X                       | Y         | Z         |
| 1                | 6                | 0              | 3.338292                | 2.559794  | 1.660906  |
| 2                | 6                | 0              | 2.018900                | 3.070936  | 1.687297  |
| 3                | 6                | 0              | 1.171860                | 2.559010  | 2.700050  |
| 4                | 6                | 0              | 1.537865                | 1.410561  | 3.462159  |
| 5                | 6                | 0              | 2.762557                | 0.734992  | 3.231494  |
| 6                | 6                | 0              | 3.705115                | 1.410515  | 2.421362  |
| 7                | 6                | 0              | 4.722504                | 0.689810  | 1.674819  |
| 8                | 6                | 0              | 5.001278                | 1.412649  | 0.454390  |
| 9                | 6                | 0              | 4.129827                | 2.565257  | 0.442690  |
| 10               | 6                | 0              | 3.565420                | 2.994505  | -0.741258 |
| 11               | 6                | 0              | 2.182324                | 3.434704  | -0.763041 |
| 12               | 6                | 0              | 1.415253                | 3.517859  | 0.423730  |
| 13               | 6                | 0              | 0.010494                | 3.406534  | 0.271315  |
| 14               | 6                | 0              | -0.839369               | 2.964298  | 1.357854  |
| 15               | 6                | 0              | -0.273356               | 2.561145  | 2.556362  |
| 16               | 6                | 0              | -0.804086               | 1.416910  | 3.233025  |
| 17               | 6                | 0              | 0.320664                | 0.689604  | 3.783756  |
| 18               | 6                | 0              | 0.320650                | -0.689961 | 3.783667  |
| 19               | 6                | 0              | 1.537898                | -1.410858 | 3.462082  |
| 20               | 6                | 0              | 2.762547                | -0.735233 | 3.231410  |
| 21               | 6                | 0              | 3.705134                | -1.410678 | 2.421258  |
| 22               | 6                | 0              | 4.722502                | -0.689896 | 1.674762  |
| 23               | 6                | 0              | 5.001265                | -1.412613 | 0.454280  |
| 24               | 6                | 0              | 5.269675                | -0.724174 | -0.724996 |
| 25               | 6                | 0              | 5.269620                | 0.724262  | -0.724929 |
| 26               | 6                | 0              | 4.674077                | 1.173209  | -1.968252 |
| 27               | 6                | 0              | 3.843588                | 2.287877  | -1.972527 |
| 28               | 6                | 0              | 2.616706                | 2.278407  | -2.737897 |
| 29               | 6                | 0              | 1.601474                | 2.995565  | -1.989468 |
| 30               | 6                | 0              | 0.235711                | 2.631741  | -2.068054 |
| 31               | 6                | 0              | -0.571324               | 2.970622  | -0.954512 |
| 32               | 6                | 0              | -1.794813               | 2.258546  | -0.651901 |
| 33               | 6                | 0              | -1.970925               | 2.263611  | 0.809251  |
| 34               | 6                | 0              | -2.489810               | 1.166867  | 1.452389  |
| 35               | 6                | 0              | -1.878928               | 0.722773  | 2.671139  |
| 36               | 6                | 0              | -1.878891               | -0.723092 | 2.671107  |
| 37               | 6                | 0              | -0.804091               | -1.417286 | 3.232982  |
| 38               | 6                | 0              | -0.273316               | -2.561451 | 2.556199  |
| 39               | 6                | 0              | 1.171903                | -2.559241 | 2.699854  |
| 40               | 6                | 0              | 2.018953                | -3.071096 | 1.687088  |
| 41               | 6                | 0              | 3.338323                | -2.559898 | 1.660695  |
| 42               | 6                | 0              | 4.129878                | -2.565271 | 0.442498  |
| 43               | 6                | 0              | 3.565464                | -2.994421 | -0.741476 |
| 44               | 6                | 0              | 3.843643                | -2.287714 | -1.972697 |
| 45               | 6                | 0              | 4.674117                | -1.173054 | -1.968343 |
| 46               | 6                | 0              | 4.308574                | 0.000121  | -2.740328 |
| 47               | 6                | 0              | 3.131353                | 0.000114  | -3.478046 |
| 48               | 6                | 0              | 2.269300                | 1.162749  | -3.474969 |
| 49               | 6                | 0              | 0.890886                | 0.713599  | -3.490757 |
| 50               | 6                | 0              | -0.129215               | 1.449017  | -2.841256 |
| 51               | 6                | 0              | -1.272254               | 0.712775  | -2.433616 |
| 52               | 6                | 0              | -2.140465               | 1.159051  | -1.377729 |
| 53               | 6                | 0              | -2.971107               | -0.000074 | -0.845568 |
| 54               | 6                | 0              | -3.175762               | -0.000056 | 0.742804  |
| 55               | 6                | 0              | -2.489899               | -1.167145 | 1.452395  |
| 56               | 6                | 0              | -1.970840               | -2.263688 | 0.809096  |
| 57               | 6                | 0              | -0.839279               | -2.964437 | 1.357612  |
| 58               | 6                | 0              | 0.010550                | -3.406620 | 0.271069  |
| 59               | 6                | 0              | 1.415315                | -3.517907 | 0.423461  |
| 60               | 6                | 0              | 2.182385                | -3.434662 | -0.763290 |
| 61               | 6                | 0              | 1.601529                | -2.995426 | -1.989680 |
| 62               | 6                | 0              | 2.616745                | -2.278266 | -2.738106 |
| 63               | 6                | 0              | 2.269348                | -1.162523 | -3.475045 |
| 64               | 6                | 0              | 0.890899                | -0.713433 | -3.490859 |
| 65               | 6                | 0              | -0.129145               | -1.448871 | -2.841315 |
| 66               | 6                | 0              | -1.272202               | -0.712629 | -2.433672 |
| 67               | 6                | 0              | -2.140266               | -1.158985 | -1.377767 |
| 68               | 6                | 0              | -1.794868               | -2.258654 | -0.652064 |
| 69               | 6                | 0              | -0.571320               | -2.970641 | -0.954731 |
| 70               | 6                | 0              | 0.235720                | -2.631696 | -2.068232 |
| 71               | 6                | 0              | -4.405873               | -0.000053 | -1.526994 |

|    |   |   |           |           |           |
|----|---|---|-----------|-----------|-----------|
| 72 | 1 | 0 | -4.285902 | 0.000122  | -2.615160 |
| 73 | 6 | 0 | -5.119912 | 1.229589  | -1.020746 |
| 74 | 6 | 0 | -5.537652 | 2.312808  | -1.783449 |
| 75 | 1 | 0 | -5.386956 | 2.315165  | -2.860502 |
| 76 | 6 | 0 | -6.148527 | 3.398033  | -1.150315 |
| 77 | 1 | 0 | -6.482609 | 4.247433  | -1.738766 |
| 78 | 6 | 0 | -6.324042 | 3.398934  | 0.232767  |
| 79 | 1 | 0 | -6.795807 | 4.248307  | 0.717831  |
| 80 | 6 | 0 | -5.890698 | 2.314893  | 0.999987  |
| 81 | 1 | 0 | -6.014214 | 2.318423  | 2.080487  |
| 82 | 6 | 0 | -5.296590 | 1.230084  | 0.367473  |
| 83 | 6 | 0 | -4.732500 | 0.000030  | 1.036884  |
| 84 | 1 | 0 | -4.891450 | -0.000064 | 2.119957  |
| 85 | 6 | 0 | -5.296922 | -1.229819 | 0.367374  |
| 86 | 6 | 0 | -5.891558 | -2.314377 | 0.999860  |
| 87 | 1 | 0 | -6.015239 | -2.317804 | 2.080344  |
| 88 | 6 | 0 | -6.324865 | -3.398464 | 0.232723  |
| 89 | 1 | 0 | -6.796903 | -4.247666 | 0.717821  |
| 90 | 6 | 0 | -6.149090 | -3.397801 | -1.150339 |
| 91 | 1 | 0 | -6.483291 | -4.247222 | -1.738692 |
| 92 | 6 | 0 | -5.537828 | -2.312825 | -1.783470 |
| 93 | 1 | 0 | -5.386931 | -2.315268 | -2.860493 |
| 94 | 6 | 0 | -5.119945 | -1.229610 | -1.020822 |

AC<sub>70</sub>MA isomer b

| Center<br>Number | Atomic<br>Number | Atomic<br>Type | Coordinates (Angstroms) |           |           |
|------------------|------------------|----------------|-------------------------|-----------|-----------|
|                  |                  |                | X                       | Y         | Z         |
| 1                | 6                | 0              | 2.302069                | 0.486928  | 3.439516  |
| 2                | 6                | 0              | 0.942505                | 0.107683  | 3.529681  |
| 3                | 6                | 0              | 0.671887                | -1.279216 | 3.436912  |
| 4                | 6                | 0              | 1.666218                | -2.199079 | 3.003312  |
| 5                | 6                | 0              | 2.965520                | -1.760595 | 2.640889  |
| 6                | 6                | 0              | 3.300763                | -0.434662 | 3.001802  |
| 7                | 6                | 0              | 4.311148                | 0.316229  | 2.278551  |
| 8                | 6                | 0              | 3.944538                | 1.715702  | 2.288432  |
| 9                | 6                | 0              | 2.688166                | 1.814717  | 2.996917  |
| 10               | 6                | 0              | 1.722720                | 2.704404  | 2.570355  |
| 11               | 6                | 0              | 0.326456                | 2.304733  | 2.567301  |
| 12               | 6                | 0              | -0.078610               | 1.054638  | 3.065289  |
| 13               | 6                | 0              | -1.289059               | 0.538794  | 2.523648  |
| 14               | 6                | 0              | -1.575224               | -0.885048 | 2.537213  |
| 15               | 6                | 0              | -0.622641               | -1.776908 | 2.996390  |
| 16               | 6                | 0              | -0.428015               | -3.012746 | 2.297533  |
| 17               | 6                | 0              | 0.995334                | -3.267646 | 2.283067  |
| 18               | 6                | 0              | 1.587042                | -3.812432 | 1.161466  |
| 19               | 6                | 0              | 2.876318                | -3.317889 | 0.712636  |
| 20               | 6                | 0              | 3.595671                | -2.344972 | 1.449967  |
| 21               | 6                | 0              | 4.512973                | -1.557232 | 0.713363  |
| 22               | 6                | 0              | 4.907220                | -0.233907 | 1.161905  |
| 23               | 6                | 0              | 5.163500                | 0.588959  | 0.000009  |
| 24               | 6                | 0              | 4.810398                | 1.933044  | 0.000019  |
| 25               | 6                | 0              | 4.184898                | 2.511662  | 1.174004  |
| 26               | 6                | 0              | 3.169908                | 3.444599  | 0.725462  |
| 27               | 6                | 0              | 1.964661                | 3.535875  | 1.413415  |
| 28               | 6                | 0              | 0.714999                | 3.620756  | 0.689533  |
| 29               | 6                | 0              | -0.294683               | 2.865999  | 1.408653  |
| 30               | 6                | 0              | -1.354489               | 2.210349  | 0.740826  |
| 31               | 6                | 0              | -1.924187               | 1.107332  | 1.406150  |
| 32               | 6                | 0              | -2.899565               | 0.107909  | 0.791314  |
| 33               | 6                | 0              | -2.407264               | -1.191204 | 1.415967  |
| 34               | 6                | 0              | -2.223495               | -2.370920 | 0.740560  |
| 35               | 6                | 0              | -1.206006               | -3.297835 | 1.174520  |
| 36               | 6                | 0              | -0.580317               | -3.869761 | -0.000021 |
| 37               | 6                | 0              | 0.786765                | -4.130199 | -0.000016 |
| 38               | 6                | 0              | 1.587051                | -3.812431 | -1.161505 |
| 39               | 6                | 0              | 2.876321                | -3.317877 | -0.712655 |
| 40               | 6                | 0              | 3.595681                | -2.344973 | -1.449980 |
| 41               | 6                | 0              | 4.512978                | -1.557223 | -0.713372 |
| 42               | 6                | 0              | 4.907216                | -0.233898 | -1.161892 |
| 43               | 6                | 0              | 4.311160                | 0.316244  | -2.278541 |
| 44               | 6                | 0              | 3.944538                | 1.715722  | -2.288394 |
| 45               | 6                | 0              | 4.184901                | 2.511680  | -1.173975 |
| 46               | 6                | 0              | 3.169911                | 3.444614  | -0.725416 |
| 47               | 6                | 0              | 1.964667                | 3.535876  | -1.413371 |
| 48               | 6                | 0              | 0.714982                | 3.620768  | -0.689496 |
| 49               | 6                | 0              | -0.294678               | 2.866011  | -1.408619 |
| 50               | 6                | 0              | -1.354501               | 2.210363  | -0.740810 |
| 51               | 6                | 0              | -1.924203               | 1.107363  | -1.406157 |
| 52               | 6                | 0              | -2.899561               | 0.107910  | -0.791342 |
| 53               | 6                | 0              | -2.407237               | -1.191187 | -1.415981 |
| 54               | 6                | 0              | -2.223489               | -2.370919 | -0.740605 |
| 55               | 6                | 0              | -1.205999               | -3.297825 | -1.174560 |
| 56               | 6                | 0              | -0.428004               | -3.012734 | -2.297572 |
| 57               | 6                | 0              | 0.995346                | -3.267630 | -2.283092 |
| 58               | 6                | 0              | 1.666235                | -2.199057 | -3.003338 |
| 59               | 6                | 0              | 2.965525                | -1.760577 | -2.640899 |
| 60               | 6                | 0              | 3.300776                | -0.434637 | -3.001788 |
| 61               | 6                | 0              | 2.302079                | 0.486955  | -3.439498 |
| 62               | 6                | 0              | 2.688178                | 1.814743  | -2.996893 |

|    |   |   |           |           |           |
|----|---|---|-----------|-----------|-----------|
| 63 | 6 | 0 | 1.722727  | 2.704422  | -2.570315 |
| 64 | 6 | 0 | 0.326462  | 2.304753  | -2.567284 |
| 65 | 6 | 0 | -0.078602 | 1.054662  | -3.065267 |
| 66 | 6 | 0 | -1.289057 | 0.538816  | -2.523652 |
| 67 | 6 | 0 | -1.575208 | -0.885021 | -2.537229 |
| 68 | 6 | 0 | -0.622623 | -1.776883 | -2.996399 |
| 69 | 6 | 0 | 0.671896  | -1.279189 | -3.436919 |
| 70 | 6 | 0 | 0.942521  | 0.107710  | -3.529678 |
| 71 | 6 | 0 | -4.374638 | 0.426879  | -1.290899 |
| 72 | 1 | 0 | -4.387619 | 0.429866  | -2.385410 |
| 73 | 6 | 0 | -4.748865 | 1.764144  | -0.699815 |
| 74 | 6 | 0 | -5.019554 | 2.931108  | -1.403155 |
| 75 | 1 | 0 | -5.004892 | 2.930721  | -2.490610 |
| 76 | 6 | 0 | -5.306526 | 4.102007  | -0.697197 |
| 77 | 1 | 0 | -5.526740 | 5.017560  | -1.238070 |
| 78 | 6 | 0 | -5.306611 | 4.102017  | 0.697083  |
| 79 | 1 | 0 | -5.526838 | 5.017589  | 1.237918  |
| 80 | 6 | 0 | -5.019603 | 2.931155  | 1.403083  |
| 81 | 1 | 0 | -5.004959 | 2.930802  | 2.490538  |
| 82 | 6 | 0 | -4.748862 | 1.764175  | 0.699782  |
| 83 | 6 | 0 | -4.374632 | 0.426938  | 1.290903  |
| 84 | 1 | 0 | -4.387580 | 0.429952  | 2.385412  |
| 85 | 6 | 0 | -5.263685 | -0.639866 | 0.699552  |
| 86 | 6 | 0 | -5.990300 | -1.592336 | 1.402937  |
| 87 | 1 | 0 | -5.976642 | -1.598684 | 2.490353  |
| 88 | 6 | 0 | -6.733693 | -2.541295 | 0.697180  |
| 89 | 1 | 0 | -7.309075 | -3.286760 | 1.238140  |
| 90 | 6 | 0 | -6.733642 | -2.541363 | -0.697090 |
| 91 | 1 | 0 | -7.308988 | -3.286873 | -1.238026 |
| 92 | 6 | 0 | -5.990208 | -1.592463 | -1.402877 |
| 93 | 1 | 0 | -5.976495 | -1.598897 | -2.490292 |
| 94 | 6 | 0 | -5.263655 | -0.639922 | -0.699521 |

#### AC<sub>70</sub>MA isomer c

| Center<br>Number | Atomic<br>Number | Atomic<br>Type | Coordinates (Angstroms) |           |           |
|------------------|------------------|----------------|-------------------------|-----------|-----------|
|                  |                  |                | X                       | Y         | Z         |
| 1                | 6                | 0              | 2.302069                | 0.486928  | 3.439516  |
| 2                | 6                | 0              | 0.942505                | 0.107683  | 3.529681  |
| 3                | 6                | 0              | 0.671887                | -1.279216 | 3.436912  |
| 4                | 6                | 0              | 1.666218                | -2.199079 | 3.003312  |
| 5                | 6                | 0              | 2.965520                | -1.760595 | 2.640889  |
| 6                | 6                | 0              | 3.300763                | -0.434662 | 3.001802  |
| 7                | 6                | 0              | 4.311148                | 0.316229  | 2.278551  |
| 8                | 6                | 0              | 3.944538                | 1.715702  | 2.288432  |
| 9                | 6                | 0              | 2.688166                | 1.814717  | 2.996917  |
| 10               | 6                | 0              | 1.722720                | 2.704404  | 2.570355  |
| 11               | 6                | 0              | 0.326456                | 2.304733  | 2.567301  |
| 12               | 6                | 0              | -0.078610               | 1.054638  | 3.065289  |
| 13               | 6                | 0              | -1.289059               | 0.538794  | 2.523648  |
| 14               | 6                | 0              | -1.575224               | -0.885048 | 2.537213  |
| 15               | 6                | 0              | -0.622641               | -1.776908 | 2.996390  |
| 16               | 6                | 0              | -0.428015               | -3.012746 | 2.297533  |
| 17               | 6                | 0              | 0.995334                | -3.267646 | 2.283067  |
| 18               | 6                | 0              | 1.587042                | -3.812432 | 1.161466  |
| 19               | 6                | 0              | 2.876318                | -3.317889 | 0.712636  |
| 20               | 6                | 0              | 3.595671                | -2.344972 | 1.449967  |
| 21               | 6                | 0              | 4.512973                | -1.557232 | 0.713363  |
| 22               | 6                | 0              | 4.907220                | -0.233907 | 1.161905  |
| 23               | 6                | 0              | 5.163500                | 0.588959  | 0.000009  |
| 24               | 6                | 0              | 4.810398                | 1.933044  | 0.000019  |
| 25               | 6                | 0              | 4.184898                | 2.511662  | 1.174004  |
| 26               | 6                | 0              | 3.169908                | 3.444599  | 0.725462  |
| 27               | 6                | 0              | 1.964661                | 3.535875  | 1.413415  |
| 28               | 6                | 0              | 0.714999                | 3.620756  | 0.689533  |
| 29               | 6                | 0              | -0.294683               | 2.865999  | 1.408653  |
| 30               | 6                | 0              | -1.354489               | 2.210349  | 0.740826  |
| 31               | 6                | 0              | -1.924187               | 1.107332  | 1.406150  |
| 32               | 6                | 0              | -2.899565               | 0.107909  | 0.791314  |
| 33               | 6                | 0              | -2.407264               | -1.191204 | 1.415967  |
| 34               | 6                | 0              | -2.223495               | -2.370920 | 0.740560  |
| 35               | 6                | 0              | -1.206006               | -3.297835 | 1.174520  |
| 36               | 6                | 0              | -0.580317               | -3.869761 | -0.000021 |
| 37               | 6                | 0              | 0.786765                | -4.130199 | -0.000016 |
| 38               | 6                | 0              | 1.587051                | -3.812431 | -1.161505 |
| 39               | 6                | 0              | 2.876321                | -3.317877 | -0.712655 |
| 40               | 6                | 0              | 3.595681                | -2.344973 | -1.449980 |
| 41               | 6                | 0              | 4.512978                | -1.557223 | -0.713372 |
| 42               | 6                | 0              | 4.907216                | -0.233898 | -1.161892 |
| 43               | 6                | 0              | 4.311160                | 0.316244  | -2.278541 |
| 44               | 6                | 0              | 3.944538                | 1.715722  | -2.288394 |
| 45               | 6                | 0              | 4.184901                | 2.511680  | -1.173975 |
| 46               | 6                | 0              | 3.169911                | 3.444614  | -0.725416 |
| 47               | 6                | 0              | 1.964667                | 3.535876  | -1.413371 |
| 48               | 6                | 0              | 0.714982                | 3.620768  | -0.689496 |
| 49               | 6                | 0              | -0.294678               | 2.866011  | -1.408619 |
| 50               | 6                | 0              | -1.354501               | 2.210363  | -0.740810 |
| 51               | 6                | 0              | -1.924203               | 1.107363  | -1.406157 |
| 52               | 6                | 0              | -2.899561               | 0.107910  | -0.791342 |
| 53               | 6                | 0              | -2.407237               | -1.191187 | -1.415981 |

|    |   |   |           |           |           |
|----|---|---|-----------|-----------|-----------|
| 54 | 6 | 0 | -2.223489 | -2.370919 | -0.740605 |
| 55 | 6 | 0 | -1.205999 | -3.297825 | -1.174560 |
| 56 | 6 | 0 | -0.428004 | -3.012734 | -2.297572 |
| 57 | 6 | 0 | 0.995346  | -3.267630 | -2.283092 |
| 58 | 6 | 0 | 1.666235  | -2.199057 | -3.003338 |
| 59 | 6 | 0 | 2.965525  | -1.760577 | -2.640899 |
| 60 | 6 | 0 | 3.300776  | -0.434637 | -3.001788 |
| 61 | 6 | 0 | 2.302079  | 0.486955  | -3.439498 |
| 62 | 6 | 0 | 2.688178  | 1.814743  | -2.996893 |
| 63 | 6 | 0 | 1.722727  | 2.704422  | -2.570315 |
| 64 | 6 | 0 | 0.326462  | 2.304753  | -2.567284 |
| 65 | 6 | 0 | -0.078602 | 1.054662  | -3.065267 |
| 66 | 6 | 0 | -1.289057 | 0.538816  | -2.523652 |
| 67 | 6 | 0 | -1.575208 | -0.885021 | -2.537229 |
| 68 | 6 | 0 | -0.622623 | -1.776883 | -2.996399 |
| 69 | 6 | 0 | 0.671896  | -1.279189 | -3.436919 |
| 70 | 6 | 0 | 0.942521  | 0.107710  | -3.529678 |
| 71 | 6 | 0 | -4.374638 | 0.426879  | -1.290899 |
| 72 | 1 | 0 | -4.387619 | 0.429866  | -2.385410 |
| 73 | 6 | 0 | -4.748865 | 1.764144  | -0.699815 |
| 74 | 6 | 0 | -5.019554 | 2.931108  | -1.403155 |
| 75 | 1 | 0 | -5.004892 | 2.930721  | -2.490610 |
| 76 | 6 | 0 | -5.306526 | 4.102007  | -0.697197 |
| 77 | 1 | 0 | -5.526740 | 5.017560  | -1.238070 |
| 78 | 6 | 0 | -5.306611 | 4.102017  | 0.697083  |
| 79 | 1 | 0 | -5.526838 | 5.017589  | 1.237918  |
| 80 | 6 | 0 | -5.019603 | 2.931155  | 1.403083  |
| 81 | 1 | 0 | -5.004959 | 2.930802  | 2.490538  |
| 82 | 6 | 0 | -4.748862 | 1.764175  | 0.699782  |
| 83 | 6 | 0 | -4.374632 | 0.426938  | 1.290903  |
| 84 | 1 | 0 | -4.387580 | 0.429952  | 2.385412  |
| 85 | 6 | 0 | -5.263685 | -0.639866 | 0.699552  |
| 86 | 6 | 0 | -5.990300 | -1.592336 | 1.402937  |
| 87 | 1 | 0 | -5.976642 | -1.598684 | 2.490353  |
| 88 | 6 | 0 | -6.733693 | -2.541295 | 0.697180  |
| 89 | 1 | 0 | -7.309075 | -3.286760 | 1.238140  |
| 90 | 6 | 0 | -6.733642 | -2.541363 | -0.697090 |
| 91 | 1 | 0 | -7.308988 | -3.286873 | -1.238026 |
| 92 | 6 | 0 | -5.990208 | -1.592463 | -1.402877 |
| 93 | 1 | 0 | -5.976495 | -1.598897 | -2.490292 |
| 94 | 6 | 0 | -5.263655 | -0.639922 | -0.699521 |

#### AC<sub>70</sub>MA isomer d

| Center<br>Number | Atomic<br>Number | Atomic<br>Type | Coordinates (Angstroms) |           |           |
|------------------|------------------|----------------|-------------------------|-----------|-----------|
|                  |                  |                | X                       | Y         | Z         |
| 1                | 6                | 0              | 3.338292                | 2.559794  | 1.660906  |
| 2                | 6                | 0              | 2.018900                | 3.070936  | 1.687297  |
| 3                | 6                | 0              | 1.171860                | 2.559010  | 2.700050  |
| 4                | 6                | 0              | 1.537865                | 1.410561  | 3.462159  |
| 5                | 6                | 0              | 2.762557                | 0.734992  | 3.231494  |
| 6                | 6                | 0              | 3.705115                | 1.410515  | 2.421362  |
| 7                | 6                | 0              | 4.722504                | 0.689810  | 1.674819  |
| 8                | 6                | 0              | 5.001278                | 1.412649  | 0.454390  |
| 9                | 6                | 0              | 4.129827                | 2.565257  | 0.442690  |
| 10               | 6                | 0              | 3.565420                | 2.994505  | -0.741258 |
| 11               | 6                | 0              | 2.182324                | 3.434704  | -0.763041 |
| 12               | 6                | 0              | 1.415253                | 3.517859  | 0.423730  |
| 13               | 6                | 0              | 0.010494                | 3.406534  | 0.271315  |
| 14               | 6                | 0              | -0.839369               | 2.964298  | 1.357854  |
| 15               | 6                | 0              | -0.273356               | 2.561145  | 2.556362  |
| 16               | 6                | 0              | -0.804086               | 1.416910  | 3.233025  |
| 17               | 6                | 0              | 0.320664                | 0.689604  | 3.783756  |
| 18               | 6                | 0              | 0.320650                | -0.689961 | 3.783667  |
| 19               | 6                | 0              | 1.537898                | -1.410858 | 3.462082  |
| 20               | 6                | 0              | 2.762547                | -0.735233 | 3.231410  |
| 21               | 6                | 0              | 3.705134                | -1.410678 | 2.421258  |
| 22               | 6                | 0              | 4.722502                | -0.689896 | 1.674762  |
| 23               | 6                | 0              | 5.001265                | -1.412613 | 0.454280  |
| 24               | 6                | 0              | 5.269675                | -0.724174 | -0.724996 |
| 25               | 6                | 0              | 5.269620                | 0.724262  | -0.724929 |
| 26               | 6                | 0              | 4.674077                | 1.173209  | -1.968252 |
| 27               | 6                | 0              | 3.843588                | 2.287877  | -1.972527 |
| 28               | 6                | 0              | 2.616706                | 2.278407  | -2.737897 |
| 29               | 6                | 0              | 1.601474                | 2.995565  | -1.989458 |
| 30               | 6                | 0              | 0.235711                | 2.631741  | -2.068054 |
| 31               | 6                | 0              | -0.571324               | 2.970622  | -0.954512 |
| 32               | 6                | 0              | -1.794813               | 2.258546  | -0.651901 |
| 33               | 6                | 0              | -1.970925               | 2.263611  | 0.809251  |
| 34               | 6                | 0              | -2.489810               | 1.166867  | 1.452389  |
| 35               | 6                | 0              | -1.878928               | 0.722773  | 2.671139  |
| 36               | 6                | 0              | -1.878891               | -0.723092 | 2.671107  |
| 37               | 6                | 0              | -0.804091               | -1.417286 | 3.232982  |
| 38               | 6                | 0              | -0.273316               | -2.561451 | 2.556199  |
| 39               | 6                | 0              | 1.171903                | -2.559241 | 2.699854  |
| 40               | 6                | 0              | 2.018953                | -3.071096 | 1.687088  |
| 41               | 6                | 0              | 3.338323                | -2.559898 | 1.660695  |
| 42               | 6                | 0              | 4.129878                | -2.565271 | 0.442498  |
| 43               | 6                | 0              | 3.565464                | -2.994421 | -0.741476 |
| 44               | 6                | 0              | 3.843643                | -2.287714 | -1.972697 |

|    |   |   |           |           |           |
|----|---|---|-----------|-----------|-----------|
| 45 | 6 | 0 | 4.674117  | -1.173054 | -1.968343 |
| 46 | 6 | 0 | 4.308574  | 0.000121  | -2.740328 |
| 47 | 6 | 0 | 3.131353  | 0.000114  | -3.478046 |
| 48 | 6 | 0 | 2.269300  | 1.162749  | -3.474969 |
| 49 | 6 | 0 | 0.890886  | 0.713599  | -3.490757 |
| 50 | 6 | 0 | -0.129215 | 1.449017  | -2.841256 |
| 51 | 6 | 0 | -1.272254 | 0.712775  | -2.433616 |
| 52 | 6 | 0 | -2.140465 | 1.159051  | -1.377729 |
| 53 | 6 | 0 | -2.971107 | -0.000074 | -0.845568 |
| 54 | 6 | 0 | -3.175762 | -0.000056 | 0.742804  |
| 55 | 6 | 0 | -2.489899 | -1.167145 | 1.452395  |
| 56 | 6 | 0 | -1.970840 | -2.263688 | 0.809096  |
| 57 | 6 | 0 | -0.839279 | -2.964437 | 1.357612  |
| 58 | 6 | 0 | 0.010550  | -3.406620 | 0.271069  |
| 59 | 6 | 0 | 1.415315  | -3.517907 | 0.423461  |
| 60 | 6 | 0 | 2.182385  | -3.434662 | -0.763290 |
| 61 | 6 | 0 | 1.601529  | -2.995426 | -1.989680 |
| 62 | 6 | 0 | 2.616745  | -2.278266 | -2.738106 |
| 63 | 6 | 0 | 2.269348  | -1.162523 | -3.475045 |
| 64 | 6 | 0 | 0.890899  | -0.713433 | -3.490859 |
| 65 | 6 | 0 | -0.129145 | -1.448871 | -2.841315 |
| 66 | 6 | 0 | -1.272202 | -0.712629 | -2.433672 |
| 67 | 6 | 0 | -2.140266 | -1.158985 | -1.377767 |
| 68 | 6 | 0 | -1.794868 | -2.258654 | -0.652064 |
| 69 | 6 | 0 | -0.571320 | -2.970641 | -0.954731 |
| 70 | 6 | 0 | 0.235720  | -2.631696 | -2.068232 |
| 71 | 6 | 0 | -4.405873 | -0.000053 | -1.526994 |
| 72 | 1 | 0 | -4.285902 | 0.000122  | -2.615160 |
| 73 | 6 | 0 | -5.119912 | 1.229589  | -1.020746 |
| 74 | 6 | 0 | -5.537652 | 2.312808  | -1.783449 |
| 75 | 1 | 0 | -5.386956 | 2.315165  | -2.860502 |
| 76 | 6 | 0 | -6.148527 | 3.398033  | -1.150315 |
| 77 | 1 | 0 | -6.482609 | 4.247433  | -1.738766 |
| 78 | 6 | 0 | -6.324042 | 3.398934  | 0.232767  |
| 79 | 1 | 0 | -6.795807 | 4.248307  | 0.717831  |
| 80 | 6 | 0 | -5.890698 | 2.314893  | 0.999987  |
| 81 | 1 | 0 | -6.014214 | 2.318423  | 2.080487  |
| 82 | 6 | 0 | -5.296590 | 1.230084  | 0.367473  |
| 83 | 6 | 0 | -4.732500 | 0.000030  | 1.036884  |
| 84 | 1 | 0 | -4.891450 | -0.000064 | 2.119957  |
| 85 | 6 | 0 | -5.296922 | -1.229819 | 0.367374  |
| 86 | 6 | 0 | -5.891558 | -2.314377 | 0.999860  |
| 87 | 1 | 0 | -6.015239 | -2.317804 | 2.080344  |
| 88 | 6 | 0 | -6.324865 | -3.398464 | 0.232723  |
| 89 | 1 | 0 | -6.796903 | -4.247666 | 0.717821  |
| 90 | 6 | 0 | -6.149090 | -3.397801 | -1.150339 |
| 91 | 1 | 0 | -6.483291 | -4.247222 | -1.738692 |
| 92 | 6 | 0 | -5.537828 | -2.312825 | -1.783470 |
| 93 | 1 | 0 | -5.386931 | -2.315268 | -2.860493 |
| 94 | 6 | 0 | -5.119945 | -1.229610 | -1.020822 |

## ICMA

| Center<br>Number | Atomic<br>Number | Atomic<br>Type | Coordinates (Angstroms) |           |           |
|------------------|------------------|----------------|-------------------------|-----------|-----------|
|                  |                  |                | X                       | Y         | Z         |
| 1                | 6                | 0              | 4.194329                | -1.418024 | 1.131578  |
| 2                | 1                | 0              | 4.303092                | -1.763086 | 2.162095  |
| 3                | 6                | 0              | 5.102585                | -0.290164 | 0.700824  |
| 4                | 6                | 0              | 5.798218                | 0.673012  | 1.414833  |
| 5                | 1                | 0              | 5.786340                | 0.685682  | 2.501864  |
| 6                | 6                | 0              | 6.525270                | 1.630075  | 0.697353  |
| 7                | 1                | 0              | 7.093735                | 2.384852  | 1.232949  |
| 8                | 6                | 0              | 6.525434                | 1.629740  | -0.697852 |
| 9                | 1                | 0              | 7.094019                | 2.384271  | -1.233663 |
| 10               | 6                | 0              | 5.798495                | 0.672350  | -1.415015 |
| 11               | 1                | 0              | 5.786779                | 0.684481  | -2.502056 |
| 12               | 6                | 0              | 5.102657                | -0.290414 | -0.700661 |
| 13               | 6                | 0              | 4.194320                | -1.418350 | -1.131124 |
| 14               | 1                | 0              | 4.303166                | -1.763779 | -2.161502 |
| 15               | 6                | 0              | 4.440727                | -2.436254 | 0.000393  |
| 16               | 1                | 0              | 5.464576                | -2.819420 | 0.000381  |
| 17               | 1                | 0              | 3.731930                | -3.271332 | 0.000516  |
| 18               | 6                | 0              | -0.351861               | -3.233664 | 1.176208  |
| 19               | 6                | 0              | 0.971423                | -2.853007 | 0.741621  |
| 20               | 6                | 0              | 1.681636                | -1.903050 | 1.431801  |
| 21               | 6                | 0              | 1.081937                | -1.275503 | 2.577748  |
| 22               | 6                | 0              | -0.181954               | -1.647842 | 3.027543  |
| 23               | 6                | 0              | -0.919261               | -2.654689 | 2.308508  |
| 24               | 6                | 0              | -1.168546               | -3.470324 | 0.000349  |
| 25               | 6                | 0              | -0.351840               | -3.233936 | -1.175544 |
| 26               | 6                | 0              | 0.971440                | -2.853170 | -0.741002 |
| 27               | 6                | 0              | 1.681662                | -1.903383 | -1.431389 |
| 28               | 6                | 0              | 2.715506                | -0.971787 | 0.803275  |
| 29               | 6                | 0              | 1.470139                | 0.122323  | 2.578937  |
| 30               | 6                | 0              | 0.578304                | 1.092248  | 3.029096  |
| 31               | 6                | 0              | -0.747455               | 0.703576  | 3.480654  |
| 32               | 6                | 0              | -1.118370               | -0.632605 | 3.480753  |
| 33               | 6                | 0              | -2.442516               | -1.020038 | 3.031474  |
| 34               | 6                | 0              | -2.318327               | -2.271502 | 2.304452  |
| 35               | 6                | 0              | -3.096862               | -2.497527 | 1.176683  |
| 36               | 6                | 0              | -2.510041               | -3.116291 | 0.000297  |

|    |   |   |           |           |           |
|----|---|---|-----------|-----------|-----------|
| 37 | 6 | 0 | -0.919194 | -2.655174 | -2.307978 |
| 38 | 6 | 0 | -2.318258 | -2.271979 | -2.304032 |
| 39 | 6 | 0 | -3.096822 | -2.497776 | -1.176236 |
| 40 | 6 | 0 | -4.034559 | -1.488835 | -0.727037 |
| 41 | 6 | 0 | -4.034584 | -1.488687 | 0.727248  |
| 42 | 6 | 0 | -4.152737 | -0.291034 | 1.420985  |
| 43 | 6 | 0 | -3.338936 | -0.051159 | 2.598239  |
| 44 | 6 | 0 | -2.950161 | 1.348326  | 2.597861  |
| 45 | 6 | 0 | -1.682687 | 1.717473  | 3.031088  |
| 46 | 6 | 0 | 2.308319  | 0.352138  | 1.435303  |
| 47 | 6 | 0 | -0.660977 | 3.548335  | -0.000363 |
| 48 | 6 | 0 | 0.670522  | 3.158682  | -0.000301 |
| 49 | 6 | 0 | 1.250119  | 2.536374  | -1.176109 |
| 50 | 6 | 0 | 0.465598  | 2.333348  | -2.309085 |
| 51 | 6 | 0 | -0.931362 | 2.725039  | -2.304326 |
| 52 | 6 | 0 | -2.805935 | 2.936698  | -0.727456 |
| 53 | 6 | 0 | -2.805955 | 2.936848  | 0.726792  |
| 54 | 6 | 0 | -1.483071 | 3.319441  | 1.175848  |
| 55 | 6 | 0 | -0.931423 | 2.725522  | 2.303763  |
| 56 | 6 | 0 | 0.465534  | 2.333836  | 2.308643  |
| 57 | 6 | 0 | 1.250087  | 2.536629  | 1.175651  |
| 58 | 6 | 0 | 2.190466  | 1.530332  | -0.741481 |
| 59 | 6 | 0 | 2.308370  | 0.351832  | -1.435293 |
| 60 | 6 | 0 | 1.470223  | 0.121783  | -2.578900 |
| 61 | 6 | 0 | 0.578381  | 1.091620  | -3.029262 |
| 62 | 6 | 0 | -0.747362 | 0.702858  | -3.480802 |
| 63 | 6 | 0 | -1.682605 | 1.716842  | -3.031467 |
| 64 | 6 | 0 | -2.950097 | 1.347792  | -2.598201 |
| 65 | 6 | 0 | -3.524966 | 1.972131  | -1.422000 |
| 66 | 6 | 0 | -3.525003 | 1.972423  | 1.421518  |
| 67 | 6 | 0 | -4.269710 | 0.960093  | 0.693982  |
| 68 | 6 | 0 | -4.269691 | 0.959950  | -0.694274 |
| 69 | 6 | 0 | -4.152697 | -0.291328 | -1.421020 |
| 70 | 6 | 0 | -3.338861 | -0.051690 | -2.598302 |
| 71 | 6 | 0 | -2.442434 | -1.020657 | -3.031313 |
| 72 | 6 | 0 | -1.118270 | -0.633326 | -3.480634 |
| 73 | 6 | 0 | -0.181868 | -1.648485 | -3.027222 |
| 74 | 6 | 0 | 1.082000  | -1.276037 | -2.577452 |
| 75 | 6 | 0 | 2.190454  | 1.530485  | 0.741246  |
| 76 | 6 | 0 | 2.715536  | -0.971935 | -0.802955 |
| 77 | 6 | 0 | -1.483041 | 3.319199  | -1.176558 |

## AICBA trans-1

| Center Number | Atomic Number | Atomic Type | Coordinates (Angstroms) |           |           |
|---------------|---------------|-------------|-------------------------|-----------|-----------|
|               |               |             | X                       | Y         | Z         |
| 1             | 6             | 0           | -5.680698               | 0.887427  | 1.131000  |
| 2             | 1             | 0           | -5.840507               | 1.211652  | 2.161654  |
| 3             | 6             | 0           | -6.405875               | -0.366476 | 0.700881  |
| 4             | 6             | 0           | -6.937223               | -1.429328 | 1.414911  |
| 5             | 1             | 0           | -6.921806               | -1.440718 | 2.501945  |
| 6             | 6             | 0           | -7.499669               | -2.491472 | 0.697766  |
| 7             | 1             | 0           | -7.940204               | -3.327753 | 1.233038  |
| 8             | 6             | 0           | -7.499659               | -2.491557 | -0.697456 |
| 9             | 1             | 0           | -7.940196               | -3.327894 | -1.232634 |
| 10            | 6             | 0           | -6.937160               | -1.429503 | -1.414695 |
| 11            | 1             | 0           | -6.921705               | -1.440986 | -2.501731 |
| 12            | 6             | 0           | -6.405802               | -0.366606 | -0.700742 |
| 13            | 6             | 0           | -5.680645               | 0.887252  | -1.131077 |
| 14            | 1             | 0           | -5.840633               | 1.211288  | -2.161761 |
| 15            | 6             | 0           | -6.078811               | 1.855493  | -0.000108 |
| 16            | 1             | 0           | -7.148776               | 2.079987  | -0.000193 |
| 17            | 1             | 0           | -5.502991               | 2.787198  | -0.000132 |
| 18            | 6             | 0           | -1.454740               | 3.363047  | 1.177086  |
| 19            | 6             | 0           | -2.705986               | 2.791218  | 0.741272  |
| 20            | 6             | 0           | -3.269991               | 1.747378  | 1.432654  |
| 21            | 6             | 0           | -2.587188               | 1.217872  | 2.580551  |
| 22            | 6             | 0           | -1.393587               | 1.775967  | 3.034075  |
| 23            | 6             | 0           | -0.811059               | 2.879183  | 2.312987  |
| 24            | 6             | 0           | -0.680042               | 3.710985  | -0.000247 |
| 25            | 6             | 0           | -1.454726               | 3.362908  | -1.177547 |
| 26            | 6             | 0           | -2.705958               | 2.791095  | -0.741666 |
| 27            | 6             | 0           | -3.270047               | 1.747275  | -1.432968 |
| 28            | 6             | 0           | -4.150961               | 0.670264  | 0.803198  |
| 29            | 6             | 0           | -2.758599               | -0.223008 | 2.581553  |
| 30            | 6             | 0           | -1.731054               | -1.047767 | 3.035703  |
| 31            | 6             | 0           | -0.480455               | -0.463168 | 3.486716  |
| 32            | 6             | 0           | -0.316339               | 0.913287  | 3.486604  |
| 33            | 6             | 0           | 0.933688                | 1.497985  | 3.032879  |
| 34            | 6             | 0           | 0.629006                | 2.707324  | 2.312812  |
| 35            | 6             | 0           | 1.368963                | 3.025620  | 1.176537  |
| 36            | 6             | 0           | 0.698054                | 3.547240  | -0.000229 |
| 37            | 6             | 0           | -0.811049               | 2.878871  | -2.313380 |
| 38            | 6             | 0           | 0.629017                | 2.707016  | -2.313162 |
| 39            | 6             | 0           | 1.368964                | 3.025466  | -1.176924 |
| 40            | 6             | 0           | 2.450151                | 2.176666  | -0.741278 |
| 41            | 6             | 0           | 2.450124                | 2.176736  | 0.741005  |
| 42            | 6             | 0           | 2.745711                | 1.026895  | 1.428767  |
| 43            | 6             | 0           | 1.959649                | 0.672796  | 2.575699  |
| 44            | 6             | 0           | 1.788276                | -0.768164 | 2.575898  |
| 45            | 6             | 0           | 0.596030                | -1.326723 | 3.033429  |

|     |   |   |           |           |           |
|-----|---|---|-----------|-----------|-----------|
| 46  | 6 | 0 | -3.549275 | -0.576490 | 1.437622  |
| 47  | 6 | 0 | -0.119299 | -3.261049 | 0.000218  |
| 48  | 6 | 0 | -1.496940 | -3.094430 | 0.000206  |
| 49  | 6 | 0 | -2.167828 | -2.572127 | -1.176301 |
| 50  | 6 | 0 | -1.427366 | -2.256384 | -2.313131 |
| 51  | 6 | 0 | 0.012779  | -2.429881 | -2.313262 |
| 52  | 6 | 0 | 1.907886  | -2.345363 | -0.740872 |
| 53  | 6 | 0 | 1.907897  | -2.345308 | 0.741183  |
| 54  | 6 | 0 | 0.656324  | -2.914371 | 1.177576  |
| 55  | 6 | 0 | 0.012778  | -2.429584 | 2.313585  |
| 56  | 6 | 0 | -1.427368 | -2.256103 | 2.313426  |
| 57  | 6 | 0 | -2.167836 | -2.571985 | 1.176639  |
| 58  | 6 | 0 | -3.249696 | -1.722897 | -0.741619 |
| 59  | 6 | 0 | -3.549235 | -0.576668 | -1.437555 |
| 60  | 6 | 0 | -2.758593 | -0.223312 | -2.581533 |
| 61  | 6 | 0 | -1.731028 | -1.048140 | -3.035545 |
| 62  | 6 | 0 | -0.480419 | -0.463625 | -3.486658 |
| 63  | 6 | 0 | 0.596057  | -1.327138 | -3.033271 |
| 64  | 6 | 0 | 1.788314  | -0.768554 | -2.575810 |
| 65  | 6 | 0 | 2.468102  | -1.298697 | -1.428333 |
| 66  | 6 | 0 | 2.467994  | -1.298453 | 1.428462  |
| 67  | 6 | 0 | 3.358513  | -0.225147 | 0.800511  |
| 68  | 6 | 0 | 3.358532  | -0.225196 | -0.800474 |
| 69  | 6 | 0 | 2.745614  | 1.026683  | -1.428868 |
| 70  | 6 | 0 | 1.959627  | 0.672418  | -2.575779 |
| 71  | 6 | 0 | 0.933679  | 1.497576  | -3.033052 |
| 72  | 6 | 0 | -0.316349 | 0.912834  | -3.486732 |
| 73  | 6 | 0 | -1.393599 | 1.775587  | -3.034362 |
| 74  | 6 | 0 | -2.587199 | 1.217572  | -2.580743 |
| 75  | 6 | 0 | -3.249701 | -1.722788 | 0.741839  |
| 76  | 6 | 0 | -4.150979 | 0.670106  | -0.803275 |
| 77  | 6 | 0 | 0.656326  | -2.914506 | -1.177184 |
| 78  | 6 | 0 | 4.857025  | -0.402304 | 1.292031  |
| 79  | 1 | 0 | 4.875729  | -0.404216 | 2.386668  |
| 80  | 6 | 0 | 5.642010  | 0.742979  | 0.699750  |
| 81  | 6 | 0 | 6.274232  | 1.760679  | 1.402949  |
| 82  | 1 | 0 | 6.259387  | 1.765644  | 2.490370  |
| 83  | 6 | 0 | 6.922828  | 2.777109  | 0.697181  |
| 84  | 1 | 0 | 7.425056  | 3.574010  | 1.237674  |
| 85  | 6 | 0 | 6.922831  | 2.777157  | -0.696925 |
| 86  | 1 | 0 | 7.425067  | 3.574096  | -1.237356 |
| 87  | 6 | 0 | 6.274214  | 1.760789  | -1.402764 |
| 88  | 1 | 0 | 6.259361  | 1.765820  | -2.490183 |
| 89  | 6 | 0 | 5.641991  | 0.743041  | -0.699631 |
| 90  | 6 | 0 | 4.857030  | -0.402210 | -1.291959 |
| 91  | 1 | 0 | 4.875704  | -0.404178 | -2.386600 |
| 92  | 6 | 0 | 5.354425  | -1.698225 | -0.699679 |
| 93  | 6 | 0 | 5.737672  | -2.833496 | -1.402627 |
| 94  | 1 | 0 | 5.723475  | -2.834770 | -2.490095 |
| 95  | 6 | 0 | 6.136578  | -3.971409 | -0.697081 |
| 96  | 1 | 0 | 6.442586  | -4.861611 | -1.238713 |
| 97  | 6 | 0 | 6.136532  | -3.971469 | 0.696975  |
| 98  | 1 | 0 | 6.442491  | -4.861722 | 1.238552  |
| 99  | 6 | 0 | 5.737620  | -2.833597 | 1.402583  |
| 100 | 1 | 0 | 5.723352  | -2.834933 | 2.490050  |
| 101 | 6 | 0 | 5.354422  | -1.698271 | 0.699695  |

#### AICBA trans-2 a

| Center<br>Number | Atomic<br>Number | Atomic<br>Type | Coordinates (Angstroms) |           |           |
|------------------|------------------|----------------|-------------------------|-----------|-----------|
|                  |                  |                | X                       | Y         | Z         |
| 1                | 6                | 0              | -5.747329               | 0.037750  | -0.575875 |
| 2                | 1                | 0              | -6.185779               | -0.701316 | -1.249888 |
| 3                | 6                | 0              | -5.954768               | 1.489207  | -0.943666 |
| 4                | 6                | 0              | -6.253710               | 2.115370  | -2.143796 |
| 5                | 1                | 0              | -6.437790               | 1.540907  | -3.048316 |
| 6                | 6                | 0              | -6.317206               | 3.513586  | -2.161697 |
| 7                | 1                | 0              | -6.566757               | 4.028198  | -3.085100 |
| 8                | 6                | 0              | -6.058486               | 4.256023  | -1.008993 |
| 9                | 1                | 0              | -6.109252               | 5.340383  | -1.047538 |
| 10               | 6                | 0              | -5.730637               | 3.620960  | 0.194313  |
| 11               | 1                | 0              | -5.510277               | 4.201596  | 1.086652  |
| 12               | 6                | 0              | -5.697106               | 2.235313  | 0.214631  |
| 13               | 6                | 0              | -5.333340               | 1.242743  | 1.293317  |
| 14               | 1                | 0              | -5.394861               | 1.600501  | 2.323423  |
| 15               | 6                | 0              | -6.213708               | 0.042439  | 0.892736  |
| 16               | 1                | 0              | -7.281198               | 0.257575  | 0.990750  |
| 17               | 1                | 0              | -5.969287               | -0.878503 | 1.432890  |
| 18               | 6                | 0              | -2.586233               | -3.403149 | 0.899620  |
| 19               | 6                | 0              | -3.497239               | -2.282399 | 0.897761  |
| 20               | 6                | 0              | -3.816933               | -1.648405 | -0.277313 |
| 21               | 6                | 0              | -3.214842               | -2.097862 | -1.503068 |
| 22               | 6                | 0              | -2.349900               | -3.190195 | -1.525226 |
| 23               | 6                | 0              | -2.027558               | -3.863160 | -0.290799 |
| 24               | 6                | 0              | -1.771168               | -3.328459 | 2.096420  |
| 25               | 6                | 0              | -2.171642               | -2.152676 | 2.846517  |
| 26               | 6                | 0              | -3.233538               | -1.494228 | 2.124848  |
| 27               | 6                | 0              | -3.300495               | -0.122470 | 2.090200  |
| 28               | 6                | 0              | -4.192654               | -0.172620 | -0.387777 |
| 29               | 6                | 0              | -2.931970               | -0.934535 | -2.320667 |

|     |   |   |           |           |           |
|-----|---|---|-----------|-----------|-----------|
| 30  | 6 | 0 | -1.796788 | -0.909057 | -3.129506 |
| 31  | 6 | 0 | -0.886071 | -2.042941 | -3.135852 |
| 32  | 6 | 0 | -1.158509 | -3.154681 | -2.350593 |
| 33  | 6 | 0 | -0.090209 | -3.803108 | -1.611084 |
| 34  | 6 | 0 | -0.632002 | -4.246281 | -0.337089 |
| 35  | 6 | 0 | 0.148637  | -4.175255 | 0.810368  |
| 36  | 6 | 0 | -0.437130 | -3.711811 | 2.057327  |
| 37  | 6 | 0 | -1.211641 | -1.408411 | 3.530703  |
| 38  | 6 | 0 | 0.182606  | -1.798457 | 3.475611  |
| 39  | 6 | 0 | 0.562193  | -2.923227 | 2.755818  |
| 40  | 6 | 0 | 1.753835  | -2.893801 | 1.930417  |
| 41  | 6 | 0 | 1.501251  | -3.664534 | 0.738060  |
| 42  | 6 | 0 | 2.016619  | -3.223136 | -0.479057 |
| 43  | 6 | 0 | 1.201280  | -3.296648 | -1.675689 |
| 44  | 6 | 0 | 1.489685  | -2.132877 | -2.493995 |
| 45  | 6 | 0 | 0.464330  | -1.524965 | -3.217803 |
| 46  | 6 | 0 | -3.358793 | 0.230182  | -1.596684 |
| 47  | 6 | 0 | 0.928636  | 1.834633  | -1.810378 |
| 48  | 6 | 0 | -0.413322 | 2.202153  | -1.767142 |
| 49  | 6 | 0 | -0.982490 | 2.664080  | -0.529001 |
| 50  | 6 | 0 | -0.169670 | 2.737940  | 0.603739  |
| 51  | 6 | 0 | 1.225529  | 2.368763  | 0.534492  |
| 52  | 6 | 0 | 2.939007  | 0.961605  | -0.758163 |
| 53  | 6 | 0 | 2.413412  | 0.034358  | -1.855591 |
| 54  | 6 | 0 | 1.336370  | 0.663302  | -2.564100 |
| 55  | 6 | 0 | 0.385960  | -0.086885 | -3.252669 |
| 56  | 6 | 0 | -1.015203 | 0.295761  | -3.203868 |
| 57  | 6 | 0 | -1.408526 | 1.409741  | -2.467677 |
| 58  | 6 | 0 | -2.335980 | 2.167213  | -0.434610 |
| 59  | 6 | 0 | -2.835943 | 1.759641  | 0.775776  |
| 60  | 6 | 0 | -1.993799 | 1.806689  | 1.938342  |
| 61  | 6 | 0 | -0.693095 | 2.298279  | 1.869912  |
| 62  | 6 | 0 | 0.371235  | 1.645232  | 2.610543  |
| 63  | 6 | 0 | 1.566110  | 1.679243  | 1.802292  |
| 64  | 6 | 0 | 2.424344  | 0.609497  | 1.795060  |
| 65  | 6 | 0 | 3.307099  | 0.216338  | 0.610430  |
| 66  | 6 | 0 | 2.481366  | -1.336154 | -1.815405 |
| 67  | 6 | 0 | 2.815596  | -2.022451 | -0.546398 |
| 68  | 6 | 0 | 3.061926  | -1.291797 | 0.587145  |
| 69  | 6 | 0 | 2.505256  | -1.723643 | 1.838325  |
| 70  | 6 | 0 | 2.112537  | -0.547039 | 2.588303  |
| 71  | 6 | 0 | 0.979590  | -0.583848 | 3.400030  |
| 72  | 6 | 0 | 0.085466  | 0.542342  | 3.409830  |
| 73  | 6 | 0 | -1.272234 | 0.030690  | 3.484488  |
| 74  | 6 | 0 | -2.288773 | 0.646127  | 2.758612  |
| 75  | 6 | 0 | -2.604749 | 1.376232  | -1.660764 |
| 76  | 6 | 0 | -3.899500 | 0.683295  | 0.939733  |
| 77  | 6 | 0 | 1.765815  | 1.934436  | -0.646725 |
| 78  | 6 | 0 | 4.829490  | 0.516765  | 0.940155  |
| 79  | 1 | 0 | 5.098550  | 0.010497  | 1.872866  |
| 80  | 6 | 0 | 4.961167  | 2.017322  | 1.034097  |
| 81  | 6 | 0 | 5.305800  | 2.746709  | 2.165114  |
| 82  | 1 | 0 | 5.540884  | 2.235031  | 3.095553  |
| 83  | 6 | 0 | 5.342077  | 4.141377  | 2.092762  |
| 84  | 1 | 0 | 5.616353  | 4.719830  | 2.969986  |
| 85  | 6 | 0 | 5.021826  | 4.793491  | 0.902952  |
| 86  | 1 | 0 | 5.047901  | 5.878223  | 0.856638  |
| 87  | 6 | 0 | 4.660527  | 4.059150  | -0.229387 |
| 88  | 1 | 0 | 4.396292  | 4.565706  | -1.154771 |
| 89  | 6 | 0 | 4.638401  | 2.672060  | -0.159973 |
| 90  | 6 | 0 | 4.234985  | 1.725694  | -1.264835 |
| 91  | 1 | 0 | 4.001132  | 2.245329  | -2.199706 |
| 92  | 6 | 0 | 5.311871  | 0.681935  | -1.433747 |
| 93  | 6 | 0 | 5.928010  | 0.317454  | -2.624155 |
| 94  | 1 | 0 | 5.666053  | 0.820332  | -3.552200 |
| 95  | 6 | 0 | 6.882161  | -0.702815 | -2.614187 |
| 96  | 1 | 0 | 7.373753  | -0.990960 | -3.538764 |
| 97  | 6 | 0 | 7.200980  | -1.357052 | -1.425079 |
| 98  | 1 | 0 | 7.939440  | -2.153556 | -1.427044 |
| 99  | 6 | 0 | 6.570415  | -0.998738 | -0.231108 |
| 100 | 1 | 0 | 6.807369  | -1.516521 | 0.695445  |
| 101 | 6 | 0 | 5.632737  | 0.026109  | -0.239759 |

#### AICBA trans-2 b

| Center<br>Number | Atomic<br>Number | Atomic<br>Type | Coordinates (Angstroms) |           |           |
|------------------|------------------|----------------|-------------------------|-----------|-----------|
|                  |                  |                | X                       | Y         | Z         |
| 1                | 6                | 0              | -5.283707               | -0.474739 | -1.758655 |
| 2                | 1                | 0              | -5.300297               | 0.018620  | -2.750694 |
| 3                | 6                | 0              | -6.547567               | -0.491625 | -0.810619 |
| 4                | 6                | 0              | -7.701566               | 0.218196  | -0.549483 |
| 5                | 1                | 0              | -7.927244               | 0.969356  | -1.049972 |
| 6                | 6                | 0              | -8.517549               | -0.223028 | 0.482953  |
| 7                | 1                | 0              | -9.310746               | 0.225558  | 0.663891  |
| 8                | 6                | 0              | -8.270478               | -1.424946 | 1.190924  |
| 9                | 1                | 0              | -8.914206               | -1.703474 | 1.800158  |
| 10               | 6                | 0              | -7.193584               | -2.252965 | 0.906117  |
| 11               | 1                | 0              | -7.095987               | -3.074425 | 1.331955  |
| 12               | 6                | 0              | -6.274333               | -1.820815 | -0.027680 |

|     |   |   |           |           |           |
|-----|---|---|-----------|-----------|-----------|
| 13  | 6 | 0 | -4.917101 | -2.258152 | -0.708162 |
| 14  | 1 | 0 | -4.613744 | -3.321229 | -0.783406 |
| 15  | 6 | 0 | -5.010112 | -1.878655 | -2.134493 |
| 16  | 1 | 0 | -5.734390 | -2.250962 | -2.513795 |
| 17  | 1 | 0 | -4.183705 | -1.931653 | -2.512872 |
| 18  | 6 | 0 | -0.718417 | -0.717745 | -3.218004 |
| 19  | 6 | 0 | -2.042527 | -0.962715 | -2.643814 |
| 20  | 6 | 0 | -2.861926 | 0.103508  | -2.313520 |
| 21  | 6 | 0 | -2.404089 | 1.475651  | -2.538498 |
| 22  | 6 | 0 | -1.151639 | 1.707332  | -3.081637 |
| 23  | 6 | 0 | -0.285360 | 0.580121  | -3.430847 |
| 24  | 6 | 0 | 0.202717  | -1.716671 | -2.673336 |
| 25  | 6 | 0 | -0.552074 | -2.578976 | -1.762490 |
| 26  | 6 | 0 | -1.939749 | -2.113003 | -1.744227 |
| 27  | 6 | 0 | -2.661899 | -2.134840 | -0.562996 |
| 28  | 6 | 0 | -3.787984 | -0.015290 | -1.094034 |
| 29  | 6 | 0 | -2.884605 | 2.300563  | -1.428721 |
| 30  | 6 | 0 | -2.086676 | 3.312538  | -0.922186 |
| 31  | 6 | 0 | -0.762580 | 3.557484  | -1.496427 |
| 32  | 6 | 0 | -0.308073 | 2.777196  | -2.546133 |
| 33  | 6 | 0 | 1.079560  | 2.311202  | -2.564406 |
| 34  | 6 | 0 | 1.093594  | 0.953344  | -3.111194 |
| 35  | 6 | 0 | 1.964884  | 0.008489  | -2.596006 |
| 36  | 6 | 0 | 1.507044  | -1.363658 | -2.370984 |
| 37  | 6 | 0 | 0.038301  | -3.041594 | -0.598557 |
| 38  | 6 | 0 | 1.417225  | -2.668388 | -0.278888 |
| 39  | 6 | 0 | 2.131181  | -1.852737 | -1.140456 |
| 40  | 6 | 0 | 2.974757  | -0.782871 | -0.604946 |
| 41  | 6 | 0 | 2.871969  | 0.367424  | -1.504536 |
| 42  | 6 | 0 | 2.858692  | 1.651805  | -0.987322 |
| 43  | 6 | 0 | 1.937569  | 2.650723  | -1.532003 |
| 44  | 6 | 0 | 1.457043  | 3.475673  | -0.422236 |
| 45  | 6 | 0 | 0.144514  | 3.916451  | -0.404938 |
| 46  | 6 | 0 | -3.639403 | 1.438284  | -0.517870 |
| 47  | 6 | 0 | -0.783449 | 2.568384  | 2.918666  |
| 48  | 6 | 0 | -2.087778 | 2.215382  | 2.616327  |
| 49  | 6 | 0 | -2.545603 | 0.843247  | 2.841314  |
| 50  | 6 | 0 | -1.674310 | -0.101603 | 3.356523  |
| 51  | 6 | 0 | -0.295382 | 0.271615  | 3.676196  |
| 52  | 6 | 0 | 1.461786  | 1.814429  | 2.889116  |
| 53  | 6 | 0 | 1.358999  | 2.964730  | 1.989534  |
| 54  | 6 | 0 | -0.028621 | 3.430720  | 2.007800  |
| 55  | 6 | 0 | -0.618982 | 3.893334  | 0.843860  |
| 56  | 6 | 0 | -1.997948 | 3.520095  | 0.524166  |
| 57  | 6 | 0 | -2.711916 | 2.704463  | 1.385744  |
| 58  | 6 | 0 | -3.452662 | 0.484304  | 1.749829  |
| 59  | 6 | 0 | -3.439399 | -0.800051 | 1.232607  |
| 60  | 6 | 0 | -2.518252 | -1.798990 | 1.777265  |
| 61  | 6 | 0 | -1.660261 | -1.459466 | 2.809694  |
| 62  | 6 | 0 | -0.272661 | -1.925455 | 2.791444  |
| 63  | 6 | 0 | 0.570899  | -0.855599 | 3.326945  |
| 64  | 6 | 0 | 1.823335  | -0.623903 | 2.783776  |
| 65  | 6 | 0 | 2.281172  | 0.748233  | 2.558782  |
| 66  | 6 | 0 | 2.081178  | 2.986580  | 0.808298  |
| 67  | 6 | 0 | 2.947439  | 1.859370  | 0.459064  |
| 68  | 6 | 0 | 3.044664  | 0.771330  | 1.309961  |
| 69  | 6 | 0 | 3.058702  | -0.586539 | 0.763158  |
| 70  | 6 | 0 | 2.303879  | -1.448841 | 1.674037  |
| 71  | 6 | 0 | 1.505974  | -2.460814 | 1.167519  |
| 72  | 6 | 0 | 0.181869  | -2.705758 | 1.741741  |
| 73  | 6 | 0 | -0.725201 | -3.064686 | 0.650287  |
| 74  | 6 | 0 | -2.037733 | -2.623911 | 0.667561  |
| 75  | 6 | 0 | -3.555450 | 1.634629  | 0.850243  |
| 76  | 6 | 0 | -3.613231 | -1.138612 | -0.311723 |
| 77  | 6 | 0 | 0.137665  | 1.569494  | 3.463344  |
| 78  | 6 | 0 | 4.412186  | -0.981198 | -1.391183 |
| 79  | 1 | 0 | 4.345751  | -1.133377 | -2.484752 |
| 80  | 6 | 0 | 5.072722  | -2.139566 | -0.679843 |
| 81  | 6 | 0 | 5.497204  | -3.342048 | -1.262692 |
| 82  | 1 | 0 | 5.406629  | -3.490885 | -2.349299 |
| 83  | 6 | 0 | 6.047479  | -4.346268 | -0.446409 |
| 84  | 1 | 0 | 6.402912  | -5.284500 | -0.897540 |
| 85  | 6 | 0 | 6.160139  | -4.148851 | 0.940742  |
| 86  | 1 | 0 | 6.602470  | -4.934579 | 1.571019  |
| 87  | 6 | 0 | 5.718169  | -2.948246 | 1.528843  |
| 88  | 1 | 0 | 5.798462  | -2.795020 | 2.615785  |
| 89  | 6 | 0 | 5.179080  | -1.944459 | 0.714613  |
| 90  | 6 | 0 | 4.604620  | -0.623821 | 1.173948  |
| 91  | 1 | 0 | 4.702070  | -0.472278 | 2.265153  |
| 92  | 6 | 0 | 5.204383  | 0.508160  | 0.371584  |
| 93  | 6 | 0 | 5.755612  | 1.690167  | 0.881073  |
| 94  | 1 | 0 | 5.831421  | 1.840990  | 1.968622  |
| 95  | 6 | 0 | 6.214679  | 2.676875  | -0.012375 |
| 96  | 1 | 0 | 6.666364  | 3.600216  | 0.379548  |
| 97  | 6 | 0 | 6.107913  | 2.485432  | -1.400618 |
| 98  | 1 | 0 | 6.478440  | 3.257488  | -2.091012 |
| 99  | 6 | 0 | 5.542936  | 1.303209  | -1.911683 |
| 100 | 1 | 0 | 5.455281  | 1.148611  | -2.997768 |
| 101 | 6 | 0 | 5.099855  | 0.313851  | -1.022936 |

| Center<br>Number | Atomic<br>Number | Atomic<br>Type | Coordinates (Angstroms) |           |           |
|------------------|------------------|----------------|-------------------------|-----------|-----------|
|                  |                  |                | X                       | Y         | Z         |
| 1                | 6                | 0              | -5.446324               | -1.112061 | -0.654702 |
| 2                | 1                | 0              | -6.226730               | -0.367516 | -0.483394 |
| 3                | 6                | 0              | -5.535377               | -2.379240 | 0.162945  |
| 4                | 6                | 0              | -6.168924               | -2.674639 | 1.359820  |
| 5                | 1                | 0              | -6.778488               | -1.933797 | 1.871186  |
| 6                | 6                | 0              | -6.007104               | -3.958619 | 1.893345  |
| 7                | 1                | 0              | -6.509173               | -4.221979 | 2.819772  |
| 8                | 6                | 0              | -5.205484               | -4.903027 | 1.251557  |
| 9                | 1                | 0              | -5.090521               | -5.891784 | 1.686141  |
| 10               | 6                | 0              | -4.544598               | -4.591217 | 0.057663  |
| 11               | 1                | 0              | -3.906027               | -5.323543 | -0.430118 |
| 12               | 6                | 0              | -4.731500               | -3.328425 | -0.483359 |
| 13               | 6                | 0              | -4.151057               | -2.644207 | -1.699934 |
| 14               | 1                | 0              | -3.753243               | -3.297107 | -2.479888 |
| 15               | 6                | 0              | -5.305448               | -1.694193 | -2.075067 |
| 16               | 1                | 0              | -6.201345               | -2.232651 | -2.395495 |
| 17               | 1                | 0              | -5.030476               | -0.948121 | -2.828317 |
| 18               | 6                | 0              | -2.608538               | 2.511182  | -2.318105 |
| 19               | 6                | 0              | -2.369592               | 1.218936  | -2.158875 |
| 20               | 6                | 0              | -3.870096               | 0.896085  | -0.984626 |
| 21               | 6                | 0              | -3.874876               | 1.846279  | 0.093743  |
| 22               | 6                | 0              | -3.299075               | 3.106688  | -0.050123 |
| 23               | 6                | 0              | -2.651044               | 3.450211  | -1.288880 |
| 24               | 6                | 0              | -1.394379               | 2.336988  | -3.086313 |
| 25               | 6                | 0              | -1.257355               | 0.926312  | -3.403078 |
| 26               | 6                | 0              | -2.389061               | 0.220422  | -2.847078 |
| 27               | 6                | 0              | -2.232064               | -1.037186 | -2.320012 |
| 28               | 6                | 0              | -3.998256               | -0.521974 | -0.435387 |
| 29               | 6                | 0              | -3.723692               | 1.115808  | 1.337338  |
| 30               | 6                | 0              | -2.995229               | 1.671718  | 2.387301  |
| 31               | 6                | 0              | -2.377873               | 2.980526  | 2.228748  |
| 32               | 6                | 0              | -2.529978               | 3.682609  | 1.041180  |
| 33               | 6                | 0              | -1.399957               | 4.384307  | 0.464319  |
| 34               | 6                | 0              | -1.475118               | 4.239077  | -0.979207 |
| 35               | 6                | 0              | -0.311007               | 4.070325  | -1.719548 |
| 36               | 6                | 0              | -0.270777               | 3.101911  | -2.803479 |
| 37               | 6                | 0              | 0.005422                | 0.340974  | -3.412991 |
| 38               | 6                | 0              | 1.179537                | 1.131456  | -3.102436 |
| 39               | 6                | 0              | 1.044685                | 2.488996  | -2.813127 |
| 40               | 6                | 0              | 1.804742                | 3.056911  | -1.734733 |
| 41               | 6                | 0              | 0.974056                | 4.040048  | -1.053860 |
| 42               | 6                | 0              | 1.047051                | 4.177256  | 0.324958  |
| 43               | 6                | 0              | -0.164648               | 4.353460  | 1.101840  |
| 44               | 6                | 0              | -0.006827               | 3.618075  | 2.344707  |
| 45               | 6                | 0              | -1.092538               | 2.946314  | 2.894050  |
| 46               | 6                | 0              | -3.633615               | -0.281950 | 1.024566  |
| 47               | 6                | 0              | 0.458903                | -0.394534 | 3.098431  |
| 48               | 6                | 0              | -0.679946               | -1.139226 | 2.802313  |
| 49               | 6                | 0              | -0.642373               | -2.087406 | 1.720370  |
| 50               | 6                | 0              | 0.539423                | -2.242869 | 0.993734  |
| 51               | 6                | 0              | 1.717390                | -1.489130 | 1.316736  |
| 52               | 6                | 0              | 2.306224                | 0.747210  | 2.185208  |
| 53               | 6                | 0              | 1.467055                | 1.713156  | 2.856780  |
| 54               | 6                | 0              | 0.333300                | 1.014926  | 3.426152  |
| 55               | 6                | 0              | -0.917857               | 1.615408  | 3.453280  |
| 56               | 6                | 0              | -2.103714               | 0.837505  | 3.144318  |
| 57               | 6                | 0              | -1.986168               | -0.512380 | 2.813921  |
| 58               | 6                | 0              | -1.923764               | -2.075460 | 1.048527  |
| 59               | 6                | 0              | -1.989225               | -2.218689 | -0.312827 |
| 60               | 6                | 0              | -0.773251               | -2.352932 | -1.068883 |
| 61               | 6                | 0              | 0.472015                | -2.377540 | -0.438484 |
| 62               | 6                | 0              | 1.610921                | -1.714411 | -1.012903 |
| 63               | 6                | 0              | 2.615255                | -1.362680 | 0.085078  |
| 64               | 6                | 0              | 3.295309                | 0.075341  | -0.087430 |
| 65               | 6                | 0              | 2.933279                | 1.075497  | 1.010734  |
| 66               | 6                | 0              | 1.302152                | 2.995220  | 2.333336  |
| 67               | 6                | 0              | 1.949253                | 3.335274  | 1.093864  |
| 68               | 6                | 0              | 2.729825                | 2.380353  | 0.446001  |
| 69               | 6                | 0              | 2.659014                | 2.239731  | -0.996216 |
| 70               | 6                | 0              | 2.822392                | 0.850648  | -1.317480 |
| 71               | 6                | 0              | 2.092800                | 0.308034  | -2.345174 |
| 72               | 6                | 0              | 1.465093                | -1.022676 | -2.185277 |
| 73               | 6                | 0              | 0.180160                | -0.971732 | -2.847525 |
| 74               | 6                | 0              | -0.924050               | -1.631551 | -2.305733 |
| 75               | 6                | 0              | -2.770491               | -1.076641 | 1.739937  |
| 76               | 6                | 0              | -3.078707               | -1.606913 | -1.182415 |
| 77               | 6                | 0              | 1.674629                | -0.580682 | 2.342554  |
| 78               | 6                | 0              | 3.769666                | -2.450750 | 0.140928  |
| 79               | 1                | 0              | 3.320243                | -3.441745 | 0.261270  |
| 80               | 6                | 0              | 4.661303                | -2.072262 | 1.299547  |
| 81               | 6                | 0              | 4.875563                | -2.812881 | 2.455028  |
| 82               | 1                | 0              | 4.401897                | -3.783974 | 2.579135  |
| 83               | 6                | 0              | 5.702493                | -2.294831 | 3.454848  |
| 84               | 1                | 0              | 5.881329                | -2.869250 | 4.359072  |
| 85               | 6                | 0              | 6.294375                | -1.041767 | 3.300738  |
| 86               | 1                | 0              | 6.932163                | -0.644348 | 4.084789  |
| 87               | 6                | 0              | 6.066945                | -0.292024 | 2.144622  |
| 88               | 1                | 0              | 6.515764                | 0.691540  | 2.026807  |
| 89               | 6                | 0              | 5.256511                | -0.814628 | 1.145054  |
| 90               | 6                | 0              | 4.867759                | -0.128797 | -0.141693 |

AICBA *trans*-3 a

|     |   |   |          |           |           |
|-----|---|---|----------|-----------|-----------|
| 91  | 1 | 0 | 5.349830 | 0.846698  | -0.262166 |
| 92  | 6 | 0 | 5.143475 | -1.059211 | -1.297628 |
| 93  | 6 | 0 | 5.854612 | -0.752924 | -2.450748 |
| 94  | 1 | 0 | 6.301816 | 0.230823  | -2.573190 |
| 95  | 6 | 0 | 5.985263 | -1.720606 | -3.449856 |
| 96  | 1 | 0 | 6.545666 | -1.492021 | -4.351535 |
| 97  | 6 | 0 | 5.395165 | -2.974546 | -3.297024 |
| 98  | 1 | 0 | 5.498821 | -3.720280 | -4.079647 |
| 99  | 6 | 0 | 4.667194 | -3.276025 | -2.143277 |
| 100 | 1 | 0 | 4.194548 | -4.248567 | -2.026654 |
| 101 | 6 | 0 | 4.550428 | -2.317800 | -1.144253 |

### AICBA *trans*-3 b

| Center Number | Atomic Number | Atomic Type | Coordinates (Angstroms) |           |           |
|---------------|---------------|-------------|-------------------------|-----------|-----------|
|               |               |             | X                       | Y         | Z         |
| 1             | 6             | 0           | -5.179444               | -0.773473 | -1.906577 |
| 2             | 1             | 0           | -5.770374               | 0.068267  | -2.274453 |
| 3             | 6             | 0           | -5.848714               | -1.673386 | -0.892723 |
| 4             | 6             | 0           | -6.908736               | -1.476057 | -0.021055 |
| 5             | 1             | 0           | -7.465386               | -0.542242 | -0.014099 |
| 6             | 6             | 0           | -7.248654               | -2.515625 | 0.852388  |
| 7             | 1             | 0           | -8.085979               | -2.392746 | 1.533312  |
| 8             | 6             | 0           | -6.522593               | -3.707255 | 0.863713  |
| 9             | 1             | 0           | -6.803014               | -4.499180 | 1.552279  |
| 10            | 6             | 0           | -5.435385               | -3.891632 | 0.002308  |
| 11            | 1             | 0           | -4.857653               | -4.812308 | 0.025996  |
| 12            | 6             | 0           | -5.119163               | -2.870266 | -0.879550 |
| 13            | 6             | 0           | -4.000143               | -2.703836 | -1.880414 |
| 14            | 1             | 0           | -3.515733               | -3.620423 | -2.224209 |
| 15            | 6             | 0           | -4.683654               | -1.810366 | -2.933498 |
| 16            | 1             | 0           | -5.505909               | -2.320210 | -3.442712 |
| 17            | 1             | 0           | -3.989396               | -1.395566 | -3.672088 |
| 18            | 6             | 0           | -1.133851               | 1.711062  | -3.131874 |
| 19            | 6             | 0           | -2.076456               | 0.636557  | -2.919593 |
| 20            | 6             | 0           | -3.149321               | 0.810456  | -2.080047 |
| 21            | 6             | 0           | -3.309817               | 2.066109  | -1.400352 |
| 22            | 6             | 0           | -2.426077               | 3.122233  | -1.613329 |
| 23            | 6             | 0           | -1.310226               | 2.941155  | -2.500099 |
| 24            | 6             | 0           | 0.193197                | 1.139379  | -3.237342 |
| 25            | 6             | 0           | 0.085589                | -0.287534 | -3.086229 |
| 26            | 6             | 0           | -1.307512               | -0.629203 | -2.893398 |
| 27            | 6             | 0           | -1.660846               | -1.634216 | -2.031910 |
| 28            | 6             | 0           | -3.807167               | -0.310338 | -1.277436 |
| 29            | 6             | 0           | -3.804172               | 1.794586  | -0.064255 |
| 30            | 6             | 0           | -3.405077               | 2.591927  | 1.005901  |
| 31            | 6             | 0           | -2.473711               | 3.685972  | 0.785253  |
| 32            | 6             | 0           | -1.993781               | 3.943655  | -0.491455 |
| 33            | 6             | 0           | -0.596404               | 4.264567  | -0.691303 |
| 34            | 6             | 0           | -0.169665               | 3.635954  | -1.931299 |
| 35            | 6             | 0           | 1.098270                | 3.077228  | -2.020810 |
| 36            | 6             | 0           | 1.289103                | 1.803452  | -2.692059 |
| 37            | 6             | 0           | 1.085999                | -0.976052 | -2.397747 |
| 38            | 6             | 0           | 2.226644                | -0.291252 | -1.858070 |
| 39            | 6             | 0           | 2.319408                | 1.069841  | -1.996023 |
| 40            | 6             | 0           | 2.764404                | 1.904179  | -0.858711 |
| 41            | 6             | 0           | 2.002243                | 3.131645  | -0.891346 |
| 42            | 6             | 0           | 1.597470                | 3.746951  | 0.292722  |
| 43            | 6             | 0           | 0.268584                | 4.316175  | 0.395630  |
| 44            | 6             | 0           | -0.233172               | 4.046781  | 1.732514  |
| 45            | 6             | 0           | -1.575872               | 3.738529  | 1.922110  |
| 46            | 6             | 0           | -3.945711               | 0.372850  | 0.075750  |
| 47            | 6             | 0           | -1.076330               | 0.525201  | 3.661309  |
| 48            | 6             | 0           | -2.152459               | -0.146420 | 3.096873  |
| 49            | 6             | 0           | -1.948913               | -1.415029 | 2.419162  |
| 50            | 6             | 0           | -0.666934               | -1.951976 | 2.331339  |
| 51            | 6             | 0           | 0.461249                | -1.245523 | 2.904811  |
| 52            | 6             | 0           | 1.178835                | 1.047149  | 3.349143  |
| 53            | 6             | 0           | 0.425324                | 2.293184  | 3.324240  |
| 54            | 6             | 0           | -0.971608               | 1.968817  | 3.521896  |
| 55            | 6             | 0           | -1.953877               | 2.675372  | 2.837663  |
| 56            | 6             | 0           | -3.085554               | 1.972457  | 2.265021  |
| 57            | 6             | 0           | -3.177631               | 0.585805  | 2.384216  |
| 58            | 6             | 0           | -2.854215               | -1.484741 | 1.295608  |
| 59            | 6             | 0           | -2.455973               | -2.081364 | 0.124874  |
| 60            | 6             | 0           | -1.125465               | -2.609282 | 0.022130  |
| 61            | 6             | 0           | -0.239856               | -2.563703 | 1.100070  |
| 62            | 6             | 0           | 1.157203                | -2.255812 | 0.890307  |
| 63            | 6             | 0           | 1.596928                | -1.421918 | 2.030795  |
| 64            | 6             | 0           | 2.476293                | -0.389289 | 1.824489  |
| 65            | 6             | 0           | 2.251142                | 0.867985  | 2.477701  |
| 66            | 6             | 0           | 0.787348                | 3.308164  | 2.449695  |
| 67            | 6             | 0           | 1.916465                | 3.126674  | 1.551429  |
| 68            | 6             | 0           | 2.624386                | 1.926932  | 1.559901  |
| 69            | 6             | 0           | 3.077954                | 1.318937  | 0.340711  |
| 70            | 6             | 0           | 3.286436                | -0.181927 | 0.544464  |
| 71            | 6             | 0           | 2.811587                | -1.084658 | -0.688120 |
| 72            | 6             | 0           | 1.627888                | -1.999970 | -0.369936 |

|     |   |   |           |           |           |
|-----|---|---|-----------|-----------|-----------|
| 73  | 6 | 0 | 0.715709  | -2.023757 | -1.481002 |
| 74  | 6 | 0 | -0.634250 | -2.331930 | -1.302815 |
| 75  | 6 | 0 | -3.623745 | -0.220725 | 1.270783  |
| 76  | 6 | 0 | -2.971877 | -1.682397 | -1.251837 |
| 77  | 6 | 0 | 0.258972  | -0.034873 | 3.566551  |
| 78  | 6 | 0 | 4.819215  | -0.487294 | 0.815589  |
| 79  | 1 | 0 | 5.160860  | 0.121855  | 1.658712  |
| 80  | 6 | 0 | 5.553189  | -0.171042 | -0.464722 |
| 81  | 6 | 0 | 6.508682  | 0.821442  | -0.642805 |
| 82  | 1 | 0 | 6.814976  | 1.442167  | 0.195984  |
| 83  | 6 | 0 | 7.066095  | 1.012762  | -1.909448 |
| 84  | 1 | 0 | 7.818956  | 1.781305  | -2.057070 |
| 85  | 6 | 0 | 6.656382  | 0.225597  | -2.984743 |
| 86  | 1 | 0 | 7.091839  | 0.382707  | -3.967172 |
| 87  | 6 | 0 | 5.682881  | -0.760939 | -2.807485 |
| 88  | 1 | 0 | 5.351492  | -1.366098 | -3.648173 |
| 89  | 6 | 0 | 5.139394  | -0.959335 | -1.544447 |
| 90  | 6 | 0 | 4.054123  | -1.943248 | -1.177404 |
| 91  | 1 | 0 | 3.746985  | -2.566443 | -2.023461 |
| 92  | 6 | 0 | 4.510576  | -2.756596 | 0.009353  |
| 93  | 6 | 0 | 4.498390  | -4.141703 | 0.114619  |
| 94  | 1 | 0 | 4.167858  | -4.751370 | -0.723164 |
| 95  | 6 | 0 | 4.911685  | -4.739460 | 1.307660  |
| 96  | 1 | 0 | 4.911100  | -5.821773 | 1.397473  |
| 97  | 6 | 0 | 5.318015  | -3.953556 | 2.385125  |
| 98  | 1 | 0 | 5.632230  | -4.425806 | 3.311343  |
| 99  | 6 | 0 | 5.318294  | -2.560464 | 2.281980  |
| 100 | 1 | 0 | 5.621390  | -1.944454 | 3.125369  |
| 101 | 6 | 0 | 4.921753  | -1.967916 | 1.089830  |

### AICBA *trans*-4 a

| Center Number | Atomic Number | Atomic Type | Coordinates (Angstroms) |           |           |
|---------------|---------------|-------------|-------------------------|-----------|-----------|
|               |               |             | X                       | Y         | Z         |
| 1             | 6             | 0           | -4.008165               | 2.510058  | -1.926050 |
| 2             | 1             | 0           | -3.879308               | 2.655190  | -3.000911 |
| 3             | 6             | 0           | -3.903697               | 3.747418  | -1.064093 |
| 4             | 6             | 0           | -3.302186               | 4.979862  | -1.267925 |
| 5             | 1             | 0           | -2.820823               | 5.220798  | -2.212540 |
| 6             | 6             | 0           | -3.332431               | 5.910851  | -0.223290 |
| 7             | 1             | 0           | -2.884485               | 6.890425  | -0.363645 |
| 8             | 6             | 0           | -3.928451               | 5.595824  | 0.998171  |
| 9             | 1             | 0           | -3.938800               | 6.333432  | 1.795625  |
| 10            | 6             | 0           | -4.509188               | 4.340052  | 1.210033  |
| 11            | 1             | 0           | -4.955683               | 4.090359  | 2.169437  |
| 12            | 6             | 0           | -4.499752               | 3.430147  | 0.164329  |
| 13            | 6             | 0           | -4.964071               | 1.996465  | 0.058765  |
| 14            | 1             | 0           | -5.704027               | 1.669100  | 0.792388  |
| 15            | 6             | 0           | -5.345626               | 1.924235  | -1.432461 |
| 16            | 1             | 0           | -6.198112               | 2.563616  | -1.676984 |
| 17            | 1             | 0           | -5.532430               | 0.904847  | -1.786929 |
| 18            | 6             | 0           | -2.690777               | -2.170351 | -2.541314 |
| 19            | 6             | 0           | -3.359477               | -0.981752 | -2.066244 |
| 20            | 6             | 0           | -2.801301               | 0.256014  | -2.268584 |
| 21            | 6             | 0           | -1.531326               | 0.348443  | -2.935889 |
| 22            | 6             | 0           | -0.886068               | -0.780810 | -3.425985 |
| 23            | 6             | 0           | -1.479253               | -2.076017 | -3.224677 |
| 24            | 6             | 0           | -2.886455               | -3.224897 | -1.566667 |
| 25            | 6             | 0           | -3.682203               | -2.697219 | -0.475485 |
| 26            | 6             | 0           | -3.984682               | -1.313014 | -0.762872 |
| 27            | 6             | 0           | -4.006196               | -0.386220 | 0.247153  |
| 28            | 6             | 0           | -2.992628               | 1.454048  | -1.339181 |
| 29            | 6             | 0           | -0.767914               | 1.401818  | -2.288491 |
| 30            | 6             | 0           | 0.616130                | 1.268615  | -2.141189 |
| 31            | 6             | 0           | 1.286776                | 0.079295  | -2.638721 |
| 32            | 6             | 0           | 0.557722                | -0.918319 | -3.275783 |
| 33            | 6             | 0           | 0.846350                | -2.296515 | -2.983110 |
| 34            | 6             | 0           | -0.411846               | -3.018803 | -2.945459 |
| 35            | 6             | 0           | -0.604928               | -4.026532 | -2.007204 |
| 36            | 6             | 0           | -1.871164               | -4.138215 | -1.310534 |
| 37            | 6             | 0           | -3.433135               | -3.112493 | 0.829547  |
| 38            | 6             | 0           | -2.367207               | -4.058122 | 1.101331  |
| 39            | 6             | 0           | -1.601184               | -4.558026 | 0.055331  |
| 40            | 6             | 0           | -0.168361               | -4.693697 | 0.204802  |
| 41            | 6             | 0           | 0.448874                | -4.358441 | -1.068698 |
| 42            | 6             | 0           | 1.647166                | -3.655682 | -1.094602 |
| 43            | 6             | 0           | 1.854187                | -2.601653 | -2.068602 |
| 44            | 6             | 0           | 2.620547                | -1.550494 | -1.443061 |
| 45            | 6             | 0           | 2.349589                | -0.236504 | -1.726388 |
| 46            | 6             | 0           | -1.557865               | 1.955986  | -1.244769 |
| 47            | 6             | 0           | 1.778996                | 0.877339  | 1.744960  |
| 48            | 6             | 0           | 0.760344                | 1.753958  | 1.475519  |
| 49            | 6             | 0           | -0.508020               | 1.634470  | 2.155617  |
| 50            | 6             | 0           | -0.700467               | 0.639205  | 3.115205  |
| 51            | 6             | 0           | 0.361108                | -0.294953 | 3.388653  |
| 52            | 6             | 0           | 2.236829                | -1.366575 | 2.208714  |
| 53            | 6             | 0           | 2.873892                | -1.038252 | 0.961869  |
| 54            | 6             | 0           | 2.867743                | 0.475785  | 0.749227  |
| 55            | 6             | 0           | 2.574531                | 0.926027  | -0.757867 |
| 56            | 6             | 0           | 1.258314                | 1.682402  | -0.942363 |

|     |   |   |           |           |           |
|-----|---|---|-----------|-----------|-----------|
| 57  | 6 | 0 | 0.484389  | 2.172611  | 0.085022  |
| 58  | 6 | 0 | -1.566581 | 1.973674  | 1.233123  |
| 59  | 6 | 0 | -2.766131 | 1.308276  | 1.279003  |
| 60  | 6 | 0 | -2.942951 | 0.244460  | 2.230884  |
| 61  | 6 | 0 | -1.948916 | -0.078013 | 3.150569  |
| 62  | 6 | 0 | -1.665655 | -1.471666 | 3.451566  |
| 63  | 6 | 0 | -0.229673 | -1.606760 | 3.600285  |
| 64  | 6 | 0 | 0.413105  | -2.743041 | 3.128537  |
| 65  | 6 | 0 | 1.678869  | -2.624354 | 2.426415  |
| 66  | 6 | 0 | 2.891621  | -1.965544 | -0.046244 |
| 67  | 6 | 0 | 2.285637  | -3.262615 | 0.146967  |
| 68  | 6 | 0 | 1.702127  | -3.599004 | 1.365672  |
| 69  | 6 | 0 | 0.446316  | -4.324721 | 1.395223  |
| 70  | 6 | 0 | -0.351025 | -3.797424 | 2.488381  |
| 71  | 6 | 0 | -1.727725 | -3.667310 | 2.344831  |
| 72  | 6 | 0 | -2.398178 | -2.477845 | 2.836527  |
| 73  | 6 | 0 | -3.448615 | -2.139373 | 1.892472  |
| 74  | 6 | 0 | -3.709909 | -0.804864 | 1.592313  |
| 75  | 6 | 0 | -0.939097 | 2.307848  | -0.064456 |
| 76  | 6 | 0 | -3.668450 | 1.091952  | 0.071483  |
| 77  | 6 | 0 | 1.562800  | -0.180415 | 2.695163  |
| 78  | 6 | 0 | 3.788548  | 1.819101  | -1.248941 |
| 79  | 1 | 0 | 3.603738  | 2.135770  | -2.280545 |
| 80  | 6 | 0 | 5.031044  | 0.973348  | -1.114187 |
| 81  | 6 | 0 | 5.852753  | 0.544169  | -2.148639 |
| 82  | 1 | 0 | 5.641605  | 0.839067  | -3.173977 |
| 83  | 6 | 0 | 6.948604  | -0.271648 | -1.856717 |
| 84  | 1 | 0 | 7.600211  | -0.606907 | -2.658273 |
| 85  | 6 | 0 | 7.205892  | -0.661695 | -0.543310 |
| 86  | 1 | 0 | 8.057454  | -1.299234 | -0.324462 |
| 87  | 6 | 0 | 6.370031  | -0.241573 | 0.494165  |
| 88  | 1 | 0 | 6.560168  | -0.555480 | 1.518015  |
| 89  | 6 | 0 | 5.288598  | 0.580948  | 0.204090  |
| 90  | 6 | 0 | 4.262601  | 1.094562  | 1.185286  |
| 91  | 1 | 0 | 4.479426  | 0.797252  | 2.216450  |
| 92  | 6 | 0 | 4.137453  | 2.590537  | 1.026784  |
| 93  | 6 | 0 | 4.205033  | 3.536909  | 2.041364  |
| 94  | 1 | 0 | 4.393984  | 3.227837  | 3.066882  |
| 95  | 6 | 0 | 4.025145  | 4.886510  | 1.728898  |
| 96  | 1 | 0 | 4.084137  | 5.634234  | 2.514426  |
| 97  | 6 | 0 | 3.765825  | 5.277226  | 0.415986  |
| 98  | 1 | 0 | 3.621669  | 6.328176  | 0.183017  |
| 99  | 6 | 0 | 3.684880  | 4.322985  | -0.601081 |
| 100 | 1 | 0 | 3.468521  | 4.621972  | -1.624108 |
| 101 | 6 | 0 | 3.879016  | 2.982909  | -0.291412 |

#### AICBA *trans*-4 b

| Center Number | Atomic Number | Atomic Type | Coordinates (Angstroms) |           |           |
|---------------|---------------|-------------|-------------------------|-----------|-----------|
|               |               |             | X                       | Y         | Z         |
| 1             | 6             | 0           | -3.644677               | -3.380478 | -0.776271 |
| 2             | 1             | 0           | -3.233520               | -4.045944 | -1.538401 |
| 3             | 6             | 0           | -5.047584               | -2.872740 | -1.013733 |
| 4             | 6             | 0           | -5.812722               | -2.746933 | -2.162682 |
| 5             | 1             | 0           | -5.441596               | -3.089294 | -3.125456 |
| 6             | 6             | 0           | -7.083431               | -2.170646 | -2.050805 |
| 7             | 1             | 0           | -7.710958               | -2.079344 | -2.932690 |
| 8             | 6             | 0           | -7.553355               | -1.710170 | -0.820365 |
| 9             | 1             | 0           | -8.541761               | -1.264278 | -0.756462 |
| 10            | 6             | 0           | -6.765917               | -1.812786 | 0.332230  |
| 11            | 1             | 0           | -7.127529               | -1.436226 | 1.285830  |
| 12            | 6             | 0           | -5.519845               | -2.410348 | 0.222585  |
| 13            | 6             | 0           | -4.405787               | -2.634134 | 1.218911  |
| 14            | 1             | 0           | -4.687175               | -2.618285 | 2.274154  |
| 15            | 6             | 0           | -3.772268               | -3.923688 | 0.660590  |
| 16            | 1             | 0           | -4.446679               | -4.781854 | 0.724733  |
| 17            | 1             | 0           | -2.809569               | -4.171481 | 1.120800  |
| 18            | 6             | 0           | 0.954307                | -2.286655 | 0.522491  |
| 19            | 6             | 0           | -0.454736               | -2.567239 | 0.584262  |
| 20            | 6             | 0           | -1.244631               | -2.471460 | -0.540447 |
| 21            | 6             | 0           | -0.644089               | -2.034723 | -1.754705 |
| 22            | 6             | 0           | 0.724938                | -1.759089 | -1.813494 |
| 23            | 6             | 0           | 1.545914                | -1.911014 | -0.661595 |
| 24            | 6             | 0           | 1.342791                | -1.621027 | 1.783791  |
| 25            | 6             | 0           | 0.156509                | -1.501020 | 2.598672  |
| 26            | 6             | 0           | -0.959607               | -2.079789 | 1.886385  |
| 27            | 6             | 0           | -2.209987               | -1.523784 | 1.981423  |
| 28            | 6             | 0           | -2.730367               | -2.118091 | -0.529100 |
| 29            | 6             | 0           | -1.585506               | -1.175434 | -2.453020 |
| 30            | 6             | 0           | -1.125965               | -0.091273 | -3.191974 |
| 31            | 6             | 0           | 0.301649                | 0.194829  | -3.254405 |
| 32            | 6             | 0           | 1.202712                | -0.616638 | -2.574142 |
| 33            | 6             | 0           | 2.323462                | -0.060692 | -1.869136 |
| 34            | 6             | 0           | 2.784752                | -1.021316 | -0.771476 |
| 35            | 6             | 0           | 3.199785                | -0.301401 | 0.596937  |
| 36            | 6             | 0           | 2.285056                | -0.625996 | 1.778364  |
| 37            | 6             | 0           | -0.031258               | -0.380865 | 3.407997  |
| 38            | 6             | 0           | 0.947274                | 0.675420  | 3.392690  |
| 39            | 6             | 0           | 2.066114                | 0.552714  | 2.573588  |
| 40            | 6             | 0           | 2.547316                | 1.695657  | 1.825536  |

|     |   |   |           |           |           |
|-----|---|---|-----------|-----------|-----------|
| 41  | 6 | 0 | 3.065946  | 1.220757  | 0.571030  |
| 42  | 6 | 0 | 2.867754  | 1.964164  | -0.561820 |
| 43  | 6 | 0 | 2.482276  | 1.300845  | -1.829690 |
| 44  | 6 | 0 | 1.540398  | 2.162679  | -2.502883 |
| 45  | 6 | 0 | 0.472314  | 1.622408  | -3.218692 |
| 46  | 6 | 0 | -2.771944 | -1.085930 | -1.649201 |
| 47  | 6 | 0 | -2.216267 | 3.470423  | -1.505970 |
| 48  | 6 | 0 | -3.150618 | 2.442613  | -1.482590 |
| 49  | 6 | 0 | -3.751405 | 2.034879  | -0.227333 |
| 50  | 6 | 0 | -3.400540 | 2.683944  | 0.953934  |
| 51  | 6 | 0 | -2.417355 | 3.750709  | 0.933198  |
| 52  | 6 | 0 | -0.418577 | 4.418410  | -0.333006 |
| 53  | 6 | 0 | 0.079326  | 3.931674  | -1.609764 |
| 54  | 6 | 0 | -1.034435 | 3.355865  | -2.337943 |
| 55  | 6 | 0 | -0.843794 | 2.227595  | -3.126247 |
| 56  | 6 | 0 | -1.828451 | 1.161153  | -3.114599 |
| 57  | 6 | 0 | -2.955847 | 1.260516  | -2.299619 |
| 58  | 6 | 0 | -3.934844 | 0.601528  | -0.255648 |
| 59  | 6 | 0 | -3.742984 | -0.139525 | 0.882253  |
| 60  | 6 | 0 | -3.336928 | 0.521761  | 2.093242  |
| 61  | 6 | 0 | -3.187516 | 1.905423  | 2.147526  |
| 62  | 6 | 0 | -2.076268 | 2.466466  | 2.880213  |
| 63  | 6 | 0 | -1.598984 | 3.630880  | 2.126458  |
| 64  | 6 | 0 | -0.236979 | 3.902878  | 2.065079  |
| 65  | 6 | 0 | 0.366845  | 4.307453  | 0.808261  |
| 66  | 6 | 0 | 1.335278  | 3.342028  | -1.684233 |
| 67  | 6 | 0 | 2.152350  | 3.217804  | -0.492474 |
| 68  | 6 | 0 | 1.681276  | 3.699641  | 0.725979  |
| 69  | 6 | 0 | 1.886615  | 2.918492  | 1.918777  |
| 70  | 6 | 0 | 0.705095  | 3.040853  | 2.754761  |
| 71  | 6 | 0 | 0.246700  | 1.946817  | 3.475737  |
| 72  | 6 | 0 | -1.173508 | 1.663677  | 3.540100  |
| 73  | 6 | 0 | -1.338097 | 0.219544  | 3.496184  |
| 74  | 6 | 0 | -2.391813 | -0.336941 | 2.776986  |
| 75  | 6 | 0 | -3.434143 | 0.114310  | -1.563545 |
| 76  | 6 | 0 | -3.271586 | -1.586824 | 0.886456  |
| 77  | 6 | 0 | -1.835845 | 4.134172  | -0.269164 |
| 78  | 6 | 0 | 4.027105  | -1.868369 | -1.276985 |
| 79  | 1 | 0 | 3.760671  | -2.366991 | -2.214540 |
| 80  | 6 | 0 | 4.361349  | -2.844241 | -0.174661 |
| 81  | 6 | 0 | 4.296406  | -4.229705 | -0.250656 |
| 82  | 1 | 0 | 4.006861  | -4.714345 | -1.180287 |
| 83  | 6 | 0 | 4.605131  | -4.990670 | 0.879710  |
| 84  | 1 | 0 | 4.563715  | -6.074720 | 0.827893  |
| 85  | 6 | 0 | 4.959944  | -4.365516 | 2.074191  |
| 86  | 1 | 0 | 5.194614  | -4.963731 | 2.949688  |
| 87  | 6 | 0 | 5.012807  | -2.971770 | 2.152554  |
| 88  | 1 | 0 | 5.277755  | -2.480260 | 3.085888  |
| 89  | 6 | 0 | 4.721018  | -2.216874 | 1.023470  |
| 90  | 6 | 0 | 4.694797  | -0.710350 | 0.934057  |
| 91  | 1 | 0 | 4.994503  | -0.227499 | 1.869900  |
| 92  | 6 | 0 | 5.535388  | -0.272645 | -0.241058 |
| 93  | 6 | 0 | 6.538923  | 0.687611  | -0.226190 |
| 94  | 1 | 0 | 6.807978  | 1.184456  | 0.703098  |
| 95  | 6 | 0 | 7.193537  | 1.009388  | -1.417684 |
| 96  | 1 | 0 | 7.984250  | 1.754061  | -1.414606 |
| 97  | 6 | 0 | 6.833155  | 0.384336  | -2.610537 |
| 98  | 1 | 0 | 7.343758  | 0.644166  | -3.533144 |
| 99  | 6 | 0 | 5.813568  | -0.570347 | -2.626576 |
| 100 | 1 | 0 | 5.519349  | -1.049227 | -3.557714 |
| 101 | 6 | 0 | 5.173468  | -0.899911 | -1.438604 |

#### AICBA e-face a

| Center Number | Atomic Number | Atomic Type | Coordinates (Angstroms) |           |           |
|---------------|---------------|-------------|-------------------------|-----------|-----------|
|               |               |             | X                       | Y         | Z         |
| 1             | 6             | 0           | -0.865136               | 4.704651  | -1.130755 |
| 2             | 1             | 0           | -1.143346               | 4.933967  | -2.161724 |
| 3             | 6             | 0           | 0.521179                | 5.124429  | -0.700863 |
| 4             | 6             | 0           | 1.676081                | 5.403448  | -1.414941 |
| 5             | 1             | 0           | 1.682578                | 5.387011  | -2.501968 |
| 6             | 6             | 0           | 2.837879                | 5.712990  | -0.697706 |
| 7             | 1             | 0           | 3.750566                | 5.957056  | -1.233782 |
| 8             | 6             | 0           | 2.837821                | 5.713185  | 0.697686  |
| 9             | 1             | 0           | 3.750469                | 5.957388  | 1.233766  |
| 10            | 6             | 0           | 1.675974                | 5.403797  | 1.414908  |
| 11            | 1             | 0           | 1.682390                | 5.387590  | 2.501941  |
| 12            | 6             | 0           | 0.521146                | 5.124532  | 0.700809  |
| 13            | 6             | 0           | -0.865157               | 4.704670  | 1.130695  |
| 14            | 1             | 0           | -1.143415               | 4.934025  | 2.161642  |
| 15            | 6             | 0           | -1.716719               | 5.314187  | -0.000048 |
| 16            | 1             | 0           | -1.691361               | 6.407278  | -0.000037 |
| 17            | 1             | 0           | -2.755387               | 4.966821  | -0.000050 |
| 18            | 6             | 0           | 1.448065                | -2.333277 | -1.170817 |
| 19            | 6             | 0           | 0.591160                | -3.393039 | -0.726116 |
| 20            | 6             | 0           | -0.567848               | -3.728748 | -1.423901 |
| 21            | 6             | 0           | -0.930164               | -2.972653 | -2.592750 |
| 22            | 6             | 0           | -0.111703               | -1.921790 | -3.003460 |
| 23            | 6             | 0           | 1.099307                | -1.608363 | -2.282325 |
| 24            | 6             | 0           | 2.262215                | -1.782922 | -0.000009 |

|     |   |   |           |           |           |
|-----|---|---|-----------|-----------|-----------|
| 25  | 6 | 0 | 1.448062  | -2.333251 | 1.170810  |
| 26  | 6 | 0 | 0.591158  | -3.393021 | 0.726125  |
| 27  | 6 | 0 | -0.567847 | -3.728709 | 1.423926  |
| 28  | 6 | 0 | -1.782418 | -4.052465 | -0.693585 |
| 29  | 6 | 0 | -2.372289 | -2.814204 | -2.596769 |
| 30  | 6 | 0 | -2.937374 | -1.618710 | -3.025807 |
| 31  | 6 | 0 | -2.084982 | -0.529829 | -3.468396 |
| 32  | 6 | 0 | -0.707180 | -0.677786 | -3.450666 |
| 33  | 6 | 0 | 0.141232  | 0.412834  | -3.001323 |
| 34  | 6 | 0 | 1.251838  | -0.137317 | -2.284846 |
| 35  | 6 | 0 | 1.731138  | 0.510910  | -1.169615 |
| 36  | 6 | 0 | 2.419045  | -0.189893 | -0.000017 |
| 37  | 6 | 0 | 1.099316  | -1.608336 | 2.282322  |
| 38  | 6 | 0 | 1.251848  | -0.137289 | 2.284828  |
| 39  | 6 | 0 | 1.731130  | 0.510916  | 1.169574  |
| 40  | 6 | 0 | 1.124708  | 1.731120  | 0.738197  |
| 41  | 6 | 0 | 1.124711  | 1.731119  | -0.738252 |
| 42  | 6 | 0 | 0.078292  | 2.296970  | -1.435888 |
| 43  | 6 | 0 | -0.437498 | 1.608789  | -2.570286 |
| 44  | 6 | 0 | -1.880868 | 1.760149  | -2.577037 |
| 45  | 6 | 0 | -2.687946 | 0.717947  | -3.022879 |
| 46  | 6 | 0 | -2.900895 | -3.482766 | -1.421282 |
| 47  | 6 | 0 | -4.747260 | 0.470775  | 0.000000  |
| 48  | 6 | 0 | -4.914409 | -0.908375 | 0.000006  |
| 49  | 6 | 0 | -4.556477 | -1.682022 | 1.175560  |
| 50  | 6 | 0 | -4.052415 | -1.041227 | 2.302001  |
| 51  | 6 | 0 | -3.893668 | 0.401804  | 2.305630  |
| 52  | 6 | 0 | -3.391400 | 2.238287  | 0.741727  |
| 53  | 6 | 0 | -3.391410 | 2.238286  | -0.741758 |
| 54  | 6 | 0 | -4.227981 | 1.143495  | -1.174625 |
| 55  | 6 | 0 | -3.893679 | 0.401772  | -2.305632 |
| 56  | 6 | 0 | -4.052426 | -1.041259 | -2.301986 |
| 57  | 6 | 0 | -4.556482 | -1.682043 | -1.175536 |
| 58  | 6 | 0 | -3.969606 | -2.927297 | 0.727133  |
| 59  | 6 | 0 | -2.900896 | -3.482756 | 1.421330  |
| 60  | 6 | 0 | -2.372284 | -2.814173 | 2.596808  |
| 61  | 6 | 0 | -2.937357 | -1.618670 | 3.025828  |
| 62  | 6 | 0 | -2.084966 | -0.529783 | 3.468398  |
| 63  | 6 | 0 | -2.687938 | 0.717990  | 3.022877  |
| 64  | 6 | 0 | -1.880864 | 1.760183  | 2.577007  |
| 65  | 6 | 0 | -2.247628 | 2.550767  | 1.432748  |
| 66  | 6 | 0 | -2.247625 | 2.550736  | -1.432778 |
| 67  | 6 | 0 | -1.000175 | 3.166323  | -0.802548 |
| 68  | 6 | 0 | -1.000150 | 3.166332  | 0.802497  |
| 69  | 6 | 0 | 0.078280  | 2.296972  | 1.435826  |
| 70  | 6 | 0 | -0.437493 | 1.608819  | 2.570244  |
| 71  | 6 | 0 | 0.141246  | 0.412871  | 3.001294  |
| 72  | 6 | 0 | -0.707165 | -0.677745 | 3.450669  |
| 73  | 6 | 0 | -0.111690 | -1.921755 | 3.003469  |
| 74  | 6 | 0 | -0.930159 | -2.972620 | 2.592776  |
| 75  | 6 | 0 | -3.969615 | -2.927317 | -0.727092 |
| 76  | 6 | 0 | -1.782421 | -4.052440 | 0.693624  |
| 77  | 6 | 0 | -4.227979 | 1.143512  | 1.174614  |
| 78  | 6 | 0 | 3.969218  | 0.151352  | -0.000001 |
| 79  | 1 | 0 | 4.094243  | 1.239155  | -0.000015 |
| 80  | 6 | 0 | 4.552674  | -0.501344 | -1.229382 |
| 81  | 6 | 0 | 5.128314  | 0.148151  | -2.314138 |
| 82  | 1 | 0 | 5.217960  | 1.232068  | -2.317593 |
| 83  | 6 | 0 | 5.584912  | -0.605870 | -3.397754 |
| 84  | 1 | 0 | 6.042803  | -0.107563 | -4.247180 |
| 85  | 6 | 0 | 5.450220  | -1.993576 | -3.396810 |
| 86  | 1 | 0 | 5.801872  | -2.572069 | -4.246059 |
| 87  | 6 | 0 | 4.857290  | -2.644117 | -2.312035 |
| 88  | 1 | 0 | 4.737072  | -3.725005 | -2.314824 |
| 89  | 6 | 0 | 4.416519  | -1.894192 | -1.228992 |
| 90  | 6 | 0 | 3.715868  | -2.420374 | 0.000019  |
| 91  | 1 | 0 | 3.627956  | -3.511705 | 0.000015  |
| 92  | 6 | 0 | 4.416498  | -1.894171 | 1.229033  |
| 93  | 6 | 0 | 4.857223  | -2.644075 | 2.312111  |
| 94  | 1 | 0 | 4.737003  | -3.724963 | 2.314913  |
| 95  | 6 | 0 | 5.450103  | -1.993513 | 3.396900  |
| 96  | 1 | 0 | 5.801714  | -2.571988 | 4.246178  |
| 97  | 6 | 0 | 5.584797  | -0.605807 | 3.397821  |
| 98  | 1 | 0 | 6.042655  | -0.107483 | 4.247255  |
| 99  | 6 | 0 | 5.128251  | 0.148192  | 2.314167  |
| 100 | 1 | 0 | 5.217901  | 1.232108  | 2.317603  |
| 101 | 6 | 0 | 4.552652  | -0.501324 | 1.229401  |

## AICBA e-face *b*

| Center Number | Atomic Number | Atomic Type | Coordinates (Angstroms) |           |           |
|---------------|---------------|-------------|-------------------------|-----------|-----------|
|               |               |             | X                       | Y         | Z         |
| 1             | 6             | 0           | -2.917031               | -3.663538 | -1.130800 |
| 2             | 1             | 0           | -2.734488               | -3.974945 | -2.161705 |
| 3             | 6             | 0           | -4.363231               | -3.575728 | -0.700819 |
| 4             | 6             | 0           | -5.542732               | -3.432951 | -1.414822 |
| 5             | 1             | 0           | -5.543292               | -3.412314 | -2.501821 |
| 6             | 6             | 0           | -6.739084               | -3.317174 | -0.697553 |
| 7             | 1             | 0           | -7.679504               | -3.221802 | -1.232724 |
| 8             | 6             | 0           | -6.739031               | -3.317177 | 0.697797  |

|     |   |   |           |           |           |
|-----|---|---|-----------|-----------|-----------|
| 9   | 1 | 0 | -7.679411 | -3.221831 | 1.233035  |
| 10  | 6 | 0 | -5.542613 | -3.432951 | 1.414954  |
| 11  | 1 | 0 | -5.543055 | -3.412350 | 2.501957  |
| 12  | 6 | 0 | -4.363185 | -3.575702 | 0.700831  |
| 13  | 6 | 0 | -2.916947 | -3.663510 | 1.130739  |
| 14  | 1 | 0 | -2.734372 | -3.975076 | 2.161581  |
| 15  | 6 | 0 | -2.331837 | -4.531901 | -0.000074 |
| 16  | 1 | 0 | -2.737911 | -5.547106 | 0.000021  |
| 17  | 1 | 0 | -1.236966 | -4.569366 | -0.000123 |
| 18  | 6 | 0 | 1.494796  | -1.526027 | -1.169138 |
| 19  | 6 | 0 | 0.321076  | -2.219831 | -0.738028 |
| 20  | 6 | 0 | -0.866925 | -2.127854 | -1.431311 |
| 21  | 6 | 0 | -0.924973 | -1.270384 | -2.568218 |
| 22  | 6 | 0 | 0.210162  | -0.580321 | -2.998230 |
| 23  | 6 | 0 | 1.442976  | -0.721023 | -2.283322 |
| 24  | 6 | 0 | 2.452107  | -1.310804 | -0.000001 |
| 25  | 6 | 0 | 1.494777  | -1.525980 | 1.169111  |
| 26  | 6 | 0 | 0.321056  | -2.219770 | 0.737999  |
| 27  | 6 | 0 | -0.866875 | -2.127945 | 1.431364  |
| 28  | 6 | 0 | -2.251248 | -2.270087 | -0.802341 |
| 29  | 6 | 0 | -2.219849 | -0.614818 | -2.578087 |
| 30  | 6 | 0 | -2.331761 | 0.698705  | -3.024595 |
| 31  | 6 | 0 | -1.147230 | 1.418576  | -3.467208 |
| 32  | 6 | 0 | 0.090328  | 0.795796  | -3.449370 |
| 33  | 6 | 0 | 1.266432  | 1.517175  | -3.003536 |
| 34  | 6 | 0 | 2.114724  | 0.596666  | -2.282615 |
| 35  | 6 | 0 | 2.801779  | 1.016159  | -1.171786 |
| 36  | 6 | 0 | 3.187811  | 0.111990  | -0.000006 |
| 37  | 6 | 0 | 1.442968  | -0.721021 | 2.283327  |
| 38  | 6 | 0 | 2.114721  | 0.596665  | 2.282642  |
| 39  | 6 | 0 | 2.801775  | 1.016146  | 1.171795  |
| 40  | 6 | 0 | 2.656387  | 2.371330  | 0.726070  |
| 41  | 6 | 0 | 2.656389  | 2.371340  | -0.726054 |
| 42  | 6 | 0 | 1.864182  | 3.281858  | -1.423209 |
| 43  | 6 | 0 | 1.149679  | 2.844186  | -2.593122 |
| 44  | 6 | 0 | -0.148523 | 3.492313  | -2.596586 |
| 45  | 6 | 0 | -1.272426 | 2.795621  | -3.025262 |
| 46  | 6 | 0 | -2.958262 | -1.079493 | -1.436362 |
| 47  | 6 | 0 | -3.317304 | 3.272253  | -0.000014 |
| 48  | 6 | 0 | -3.924554 | 2.023363  | -0.000023 |
| 49  | 6 | 0 | -3.855657 | 1.175614  | 1.174766  |
| 50  | 6 | 0 | -3.173105 | 1.617702  | 2.306496  |
| 51  | 6 | 0 | -2.522791 | 2.916307  | 2.302213  |
| 52  | 6 | 0 | -1.427340 | 4.454608  | 0.727337  |
| 53  | 6 | 0 | -1.427334 | 4.454609  | -0.727340 |
| 54  | 6 | 0 | -2.596557 | 3.727769  | -1.175342 |
| 55  | 6 | 0 | -2.522782 | 2.916322  | -2.302241 |
| 56  | 6 | 0 | -3.173105 | 1.617724  | -2.306536 |
| 57  | 6 | 0 | -3.855660 | 1.175624  | -1.174812 |
| 58  | 6 | 0 | -3.748681 | -0.198085 | 0.741560  |
| 59  | 6 | 0 | -2.958235 | -1.079484 | 1.436310  |
| 60  | 6 | 0 | -2.219838 | -0.614853 | 2.578055  |
| 61  | 6 | 0 | -2.331757 | 0.698689  | 3.024536  |
| 62  | 6 | 0 | -1.147243 | 1.418570  | 3.467197  |
| 63  | 6 | 0 | -1.272447 | 2.795615  | 3.025255  |
| 64  | 6 | 0 | -0.148543 | 3.492308  | 2.596584  |
| 65  | 6 | 0 | -0.228709 | 4.340687  | 1.422119  |
| 66  | 6 | 0 | -0.228699 | 4.340687  | -1.422115 |
| 67  | 6 | 0 | 1.019315  | 4.212399  | -0.693568 |
| 68  | 6 | 0 | 1.019309  | 4.212397  | 0.693578  |
| 69  | 6 | 0 | 1.864166  | 3.281844  | 1.423219  |
| 70  | 6 | 0 | 1.149659  | 2.844180  | 2.593133  |
| 71  | 6 | 0 | 1.266416  | 1.517168  | 3.003540  |
| 72  | 6 | 0 | 0.090309  | 0.795774  | 3.449362  |
| 73  | 6 | 0 | 0.210149  | -0.580346 | 2.998258  |
| 74  | 6 | 0 | -0.924969 | -1.270427 | 2.568226  |
| 75  | 6 | 0 | -3.748667 | -0.198087 | -0.741603 |
| 76  | 6 | 0 | -2.251310 | -2.270073 | 0.802270  |
| 77  | 6 | 0 | -2.596571 | 3.727769  | 1.175329  |
| 78  | 6 | 0 | 4.754335  | -0.144323 | -0.000027 |
| 79  | 1 | 0 | 5.273553  | 0.819619  | -0.000073 |
| 80  | 6 | 0 | 5.056465  | -0.967865 | -1.229704 |
| 81  | 6 | 0 | 5.834135  | -0.581011 | -2.314217 |
| 82  | 1 | 0 | 6.321115  | 0.391471  | -2.320022 |
| 83  | 6 | 0 | 5.979425  | -1.453245 | -3.395952 |
| 84  | 1 | 0 | 6.589943  | -1.161944 | -4.245529 |
| 85  | 6 | 0 | 5.339896  | -2.691928 | -3.393301 |
| 86  | 1 | 0 | 5.453921  | -3.362293 | -4.240161 |
| 87  | 6 | 0 | 4.546558  | -3.073399 | -2.308749 |
| 88  | 1 | 0 | 4.033855  | -4.032623 | -2.309099 |
| 89  | 6 | 0 | 4.414391  | -2.210908 | -1.227998 |
| 90  | 6 | 0 | 3.568344  | -2.439257 | 0.000043  |
| 91  | 1 | 0 | 3.081621  | -3.420057 | 0.000065  |
| 92  | 6 | 0 | 4.414415  | -2.210846 | 1.228045  |
| 93  | 6 | 0 | 4.546607  | -3.073280 | 2.308840  |
| 94  | 1 | 0 | 4.033896  | -4.032498 | 2.309277  |
| 95  | 6 | 0 | 5.339980  | -2.691751 | 3.393345  |
| 96  | 1 | 0 | 5.454016  | -3.362066 | 4.240245  |
| 97  | 6 | 0 | 5.979528  | -1.453077 | 3.395913  |
| 98  | 1 | 0 | 6.590067  | -1.161755 | 4.245468  |
| 99  | 6 | 0 | 5.834220  | -0.580901 | 2.314135  |
| 100 | 1 | 0 | 6.321205  | 0.391578  | 2.319845  |
| 101 | 6 | 0 | 5.056507  | -0.967813 | 1.229670  |

## AICBA e-edge

| Center Number | Atomic Number | Atomic Type | Coordinates (Angstroms) |           |           |
|---------------|---------------|-------------|-------------------------|-----------|-----------|
|               |               |             | X                       | Y         | Z         |
| 1             | 6             | 0           | -4.162296               | 2.699186  | 1.254098  |
| 2             | 1             | 0           | -5.116274               | 2.299363  | 1.604683  |
| 3             | 6             | 0           | -4.222608               | 3.651862  | 0.083697  |
| 4             | 6             | 0           | -5.171595               | 3.850387  | -0.906672 |
| 5             | 1             | 0           | -6.108063               | 3.298170  | -0.906270 |
| 6             | 6             | 0           | -4.892880               | 4.784852  | -1.910513 |
| 7             | 1             | 0           | -5.627376               | 4.972031  | -2.688483 |
| 8             | 6             | 0           | -3.680187               | 5.474626  | -1.926833 |
| 9             | 1             | 0           | -3.483931               | 6.193239  | -2.717345 |
| 10            | 6             | 0           | -2.712388               | 5.249413  | -0.940542 |
| 11            | 1             | 0           | -1.760445               | 5.773940  | -0.968031 |
| 12            | 6             | 0           | -3.003370               | 4.343179  | 0.068064  |
| 13            | 6             | 0           | -2.194959               | 3.815437  | 1.231538  |
| 14            | 1             | 0           | -1.356380               | 4.433036  | 1.560273  |
| 15            | 6             | 0           | -3.313332               | 3.515136  | 2.248485  |
| 16            | 1             | 0           | -3.824956               | 4.420326  | 2.586645  |
| 17            | 1             | 0           | -2.974704               | 2.934789  | 3.113312  |
| 18            | 6             | 0           | -1.320544               | -2.418985 | -3.258359 |
| 19            | 6             | 0           | -0.277142               | -3.326277 | -2.822681 |
| 20            | 6             | 0           | -0.538907               | -4.255968 | -1.821888 |
| 21            | 6             | 0           | -1.854143               | -4.321512 | -1.220336 |
| 22            | 6             | 0           | -2.855762               | -3.453780 | -1.640256 |
| 23            | 6             | 0           | -2.583416               | -2.479574 | -2.681208 |
| 24            | 6             | 0           | -0.706120               | -1.130474 | -3.523295 |
| 25            | 6             | 0           | 0.720135                | -1.254456 | -3.260154 |
| 26            | 6             | 0           | 0.981040                | -2.601624 | -2.829654 |
| 27            | 6             | 0           | 1.919410                | -2.824058 | -1.823457 |
| 28            | 6             | 0           | 0.442485                | -4.494588 | -0.779203 |
| 29            | 6             | 0           | -1.687756               | -4.608241 | 0.195865  |
| 30            | 6             | 0           | -2.529766               | -4.012930 | 1.128577  |
| 31            | 6             | 0           | -3.567654               | -3.100858 | 0.687116  |
| 32            | 6             | 0           | -3.727597               | -2.828622 | -0.663788 |
| 33            | 6             | 0           | -3.988349               | -1.469684 | -1.108326 |
| 34            | 6             | 0           | -3.289150               | -1.256397 | -2.347945 |
| 35            | 6             | 0           | -2.691157               | -0.019789 | -2.587227 |
| 36            | 6             | 0           | -1.373395               | 0.037456  | -3.189392 |
| 37            | 6             | 0           | 1.411219                | -0.201864 | -2.667252 |
| 38            | 6             | 0           | 0.713894                | 1.024692  | -2.327117 |
| 39            | 6             | 0           | -0.653597               | 1.146352  | -2.585911 |
| 40            | 6             | 0           | -1.506019               | 1.777645  | -1.624036 |
| 41            | 6             | 0           | -2.793567               | 1.048090  | -1.618999 |
| 42            | 6             | 0           | -3.473076               | 0.847316  | -0.441557 |
| 43            | 6             | 0           | -4.053193               | -0.436431 | -0.175803 |
| 44            | 6             | 0           | -3.885280               | -0.721782 | 1.238239  |
| 45            | 6             | 0           | -3.659351               | -2.028776 | 1.663733  |
| 46            | 6             | 0           | -0.269611               | -4.717970 | 0.466301  |
| 47            | 6             | 0           | -0.581541               | -1.319879 | 3.524012  |
| 48            | 6             | 0           | 0.090402                | -2.495451 | 3.227429  |
| 49            | 6             | 0           | 1.413930                | -2.443851 | 2.623567  |
| 50            | 6             | 0           | 2.002227                | -1.214355 | 2.341739  |
| 51            | 6             | 0           | 1.301103                | 0.015371  | 2.661878  |
| 52            | 6             | 0           | -0.982319               | 0.879217  | 2.815388  |
| 53            | 6             | 0           | -2.269033               | 0.148469  | 2.820146  |
| 54            | 6             | 0           | -2.001621               | -1.202793 | 3.257495  |
| 55            | 6             | 0           | -2.692265               | -2.277304 | 2.700682  |
| 56            | 6             | 0           | -1.987239               | -3.502291 | 2.374018  |
| 57            | 6             | 0           | -0.625563               | -3.609826 | 2.632791  |
| 58            | 6             | 0           | 1.510663                | -3.509053 | 1.662283  |
| 59            | 6             | 0           | 2.188712                | -3.286316 | 0.465373  |
| 60            | 6             | 0           | 2.816121                | -2.013156 | 0.203356  |
| 61            | 6             | 0           | 2.733095                | -1.000247 | 1.123182  |
| 62            | 6             | 0           | 2.751942                | 0.489293  | 0.777284  |
| 63            | 6             | 0           | 1.598246                | 0.976613  | 1.654187  |
| 64            | 6             | 0           | 0.599233                | 1.826782  | 1.236093  |
| 65            | 6             | 0           | -0.703819               | 1.796213  | 1.825874  |
| 66            | 6             | 0           | -3.198802               | 0.386489  | 1.838157  |
| 67            | 6             | 0           | -3.141687               | 1.558673  | 0.863202  |
| 68            | 6             | 0           | -1.743364               | 2.348510  | 0.854572  |
| 69            | 6             | 0           | -0.967348               | 2.257803  | -0.450337 |
| 70            | 6             | 0           | 0.432422                | 2.118383  | -0.200268 |
| 71            | 6             | 0           | 1.274066                | 1.538456  | -1.123923 |
| 72            | 6             | 0           | 2.570878                | 0.803826  | -0.780891 |
| 73            | 6             | 0           | 2.406766                | -0.438347 | -1.658080 |
| 74            | 6             | 0           | 2.646856                | -1.721495 | -1.240369 |
| 75            | 6             | 0           | 0.251363                | -4.231071 | 1.659945  |
| 76            | 6             | 0           | 1.639855                | -3.790337 | -0.778601 |
| 77            | 6             | 0           | 0.034426                | -0.033184 | 3.246603  |
| 78            | 6             | 0           | 4.113639                | 1.145496  | 1.256354  |
| 79            | 1             | 0           | 4.252275                | 0.941094  | 2.322956  |
| 80            | 6             | 0           | 4.006901                | 2.621073  | 0.957818  |
| 81            | 6             | 0           | 4.000039                | 3.652701  | 1.887979  |
| 82            | 1             | 0           | 4.106988                | 3.434566  | 2.948126  |
| 83            | 6             | 0           | 3.852050                | 4.969646  | 1.445800  |
| 84            | 1             | 0           | 3.853466                | 5.783788  | 2.164795  |
| 85            | 6             | 0           | 3.699398                | 5.243110  | 0.087110  |
| 86            | 1             | 0           | 3.583357                | 6.269535  | -0.248620 |

|     |   |   |          |           |           |
|-----|---|---|----------|-----------|-----------|
| 87  | 6 | 0 | 3.691517 | 4.203134  | -0.845758 |
| 88  | 1 | 0 | 3.558568 | 4.411742  | -1.904823 |
| 89  | 6 | 0 | 3.852094 | 2.895121  | -0.405927 |
| 90  | 6 | 0 | 3.823906 | 1.650168  | -1.260282 |
| 91  | 1 | 0 | 3.715643 | 1.873566  | -2.326569 |
| 92  | 6 | 0 | 5.048473 | 0.819386  | -0.960185 |
| 93  | 6 | 0 | 5.938586 | 0.293274  | -1.888370 |
| 94  | 1 | 0 | 5.805793 | 0.494192  | -2.948921 |
| 95  | 6 | 0 | 6.999348 | -0.499465 | -1.443561 |
| 96  | 1 | 0 | 7.703357 | -0.910289 | -2.161167 |
| 97  | 6 | 0 | 7.155013 | -0.770704 | -0.084935 |
| 98  | 1 | 0 | 7.979816 | -1.392073 | 0.251274  |
| 99  | 6 | 0 | 6.251403 | -0.252237 | 0.845984  |
| 100 | 1 | 0 | 6.361389 | -0.473277 | 1.905176  |
| 101 | 6 | 0 | 5.205159 | 0.546878  | 0.403397  |

## AICBA cis-2 a

| Center Number | Atomic Number | Atomic Type | Coordinates (Angstroms) |           |           |
|---------------|---------------|-------------|-------------------------|-----------|-----------|
|               |               |             | X                       | Y         | Z         |
| 1             | 6             | 0           | 1.348223                | -4.038419 | -1.698251 |
| 2             | 1             | 0           | 0.707548                | -4.885643 | -1.952258 |
| 3             | 6             | 0           | 2.463975                | -4.312430 | -0.728715 |
| 4             | 6             | 0           | 2.654270                | -5.323068 | 0.199604  |
| 5             | 1             | 0           | 1.934085                | -6.130774 | 0.303367  |
| 6             | 6             | 0           | 3.803600                | -5.280920 | 0.996214  |
| 7             | 1             | 0           | 3.985675                | -6.067387 | 1.722820  |
| 8             | 6             | 0           | 4.718471                | -4.238095 | 0.861170  |
| 9             | 1             | 0           | 5.609862                | -4.220633 | 1.481654  |
| 10            | 6             | 0           | 4.504463                | -3.209581 | -0.063929 |
| 11            | 1             | 0           | 5.223133                | -2.406249 | -0.152597 |
| 12            | 6             | 0           | 3.369736                | -3.251367 | -0.858295 |
| 13            | 6             | 0           | 2.803957                | -2.322928 | -1.920931 |
| 14            | 1             | 0           | 3.513273                | -1.639595 | -2.391098 |
| 15            | 6             | 0           | 2.113114                | -3.346914 | -2.842379 |
| 16            | 1             | 0           | 2.826687                | -4.017075 | -3.329292 |
| 17            | 1             | 0           | 1.460561                | -2.889973 | -3.593746 |
| 18            | 6             | 0           | -3.774103               | 2.740571  | 1.209121  |
| 19            | 6             | 0           | -3.408521               | 3.187096  | -0.123901 |
| 20            | 6             | 0           | -3.893362               | 2.511534  | -1.237883 |
| 21            | 6             | 0           | -4.770392               | 1.368412  | -1.070259 |
| 22            | 6             | 0           | -5.125390               | 0.944968  | 0.205750  |
| 23            | 6             | 0           | -4.611751               | 1.643561  | 1.368541  |
| 24            | 6             | 0           | -2.613800               | 2.897635  | 2.065787  |
| 25            | 6             | 0           | -1.538092               | 3.443627  | 1.255763  |
| 26            | 6             | 0           | -2.027798               | 3.624673  | -0.087705 |
| 27            | 6             | 0           | -1.183425               | 3.353384  | -1.162254 |
| 28            | 6             | 0           | -3.016735               | 2.240647  | -2.361090 |
| 29            | 6             | 0           | -4.445114               | 0.393732  | -2.095130 |
| 30            | 6             | 0           | -4.492021               | -0.964604 | -1.804804 |
| 31            | 6             | 0           | -4.856871               | -1.406048 | -0.468502 |
| 32            | 6             | 0           | -5.164499               | -0.472259 | 0.513457  |
| 33            | 6             | 0           | -4.669103               | -0.650261 | 1.866485  |
| 34            | 6             | 0           | -4.328231               | 0.655458  | 2.394112  |
| 35            | 6             | 0           | -3.213186               | 0.803890  | 3.211482  |
| 36            | 6             | 0           | -2.335948               | 1.949903  | 3.041309  |
| 37            | 6             | 0           | -0.232162               | 3.001588  | 1.451070  |
| 38            | 6             | 0           | 0.060369                | 2.012589  | 2.471389  |
| 39            | 6             | 0           | -0.972466               | 1.502512  | 3.256697  |
| 40            | 6             | 0           | -1.001134               | 0.094869  | 3.547953  |
| 41            | 6             | 0           | -2.387265               | -0.343654 | 3.528649  |
| 42            | 6             | 0           | -2.713225               | -1.594428 | 3.022321  |
| 43            | 6             | 0           | -3.880177               | -1.752859 | 2.178181  |
| 44            | 6             | 0           | -3.557963               | -2.726546 | 1.149656  |
| 45            | 6             | 0           | -4.039542               | -2.558705 | -0.141942 |
| 46            | 6             | 0           | -3.358579               | 0.928474  | -2.891737 |
| 47            | 6             | 0           | -0.789490               | -2.713066 | -1.873103 |
| 48            | 6             | 0           | -1.051926               | -1.783237 | -2.840285 |
| 49            | 6             | 0           | -0.151068               | -0.618798 | -2.991209 |
| 50            | 6             | 0           | 0.961291                | -0.470867 | -2.176411 |
| 51            | 6             | 0           | 1.545139                | -1.581991 | -1.302603 |
| 52            | 6             | 0           | 0.019659                | -3.012775 | 0.291742  |
| 53            | 6             | 0           | -1.357255               | -3.408567 | 0.279588  |
| 54            | 6             | 0           | -1.861249               | -3.230659 | -1.069080 |
| 55            | 6             | 0           | -3.175165               | -2.823908 | -1.279178 |
| 56            | 6             | 0           | -3.455442               | -1.846056 | -2.301627 |
| 57            | 6             | 0           | -2.405870               | -1.330012 | -3.058623 |
| 58            | 6             | 0           | -0.967893               | 0.508379  | -3.314812 |
| 59            | 6             | 0           | -0.642681               | 1.766770  | -2.806936 |
| 60            | 6             | 0           | 0.502051                | 1.912430  | -1.968207 |
| 61            | 6             | 0           | 1.279337                | 0.812687  | -1.654752 |
| 62            | 6             | 0           | 2.140370                | 0.709630  | -0.398793 |
| 63            | 6             | 0           | 1.837451                | -0.759391 | -0.042981 |
| 64            | 6             | 0           | 1.416267                | -1.150145 | 1.174496  |
| 65            | 6             | 0           | 0.507428                | -2.306924 | 1.362063  |
| 66            | 6             | 0           | -2.193175               | -3.167149 | 1.368292  |
| 67            | 6             | 0           | -1.669872               | -2.467933 | 2.510386  |
| 68            | 6             | 0           | -0.347075               | -2.030765 | 2.489498  |
| 69            | 6             | 0           | -0.005730               | -0.725066 | 3.021419  |
| 70            | 6             | 0           | 1.066440                | -0.174208 | 2.232303  |
| 71            | 6             | 0           | 1.114327                | 1.171594  | 1.984581  |
| 72            | 6             | 0           | 1.741668                | 1.776467  | 0.736762  |

|     |   |   |           |           |           |
|-----|---|---|-----------|-----------|-----------|
| 73  | 6 | 0 | 0.638300  | 2.752930  | 0.338621  |
| 74  | 6 | 0 | 0.173985  | 2.918969  | -0.936309 |
| 75  | 6 | 0 | -2.358365 | 0.086605  | -3.356572 |
| 76  | 6 | 0 | -1.691913 | 2.647367  | -2.321646 |
| 77  | 6 | 0 | 0.528005  | -2.823373 | -1.122406 |
| 78  | 6 | 0 | 3.664866  | 0.981599  | -0.773888 |
| 79  | 1 | 0 | 3.975234  | 0.306842  | -1.576368 |
| 80  | 6 | 0 | 4.505528  | 0.820147  | 0.470380  |
| 81  | 6 | 0 | 5.614075  | -0.000539 | 0.620143  |
| 82  | 1 | 0 | 5.975870  | -0.581742 | -0.223297 |
| 83  | 6 | 0 | 6.284821  | -0.038476 | 1.844813  |
| 84  | 1 | 0 | 7.151829  | -0.681767 | 1.966285  |
| 85  | 6 | 0 | 5.851576  | 0.753837  | 2.906060  |
| 86  | 1 | 0 | 6.371193  | 0.714379  | 3.858875  |
| 87  | 6 | 0 | 4.772651  | 1.625718  | 2.737960  |
| 88  | 1 | 0 | 4.458477  | 2.278440  | 3.549043  |
| 89  | 6 | 0 | 4.119337  | 1.668885  | 1.513104  |
| 90  | 6 | 0 | 3.022961  | 2.621351  | 1.113774  |
| 91  | 1 | 0 | 2.763859  | 3.323504  | 1.912799  |
| 92  | 6 | 0 | 3.438935  | 3.321772  | -0.160507 |
| 93  | 6 | 0 | 3.450873  | 4.692080  | -0.383656 |
| 94  | 1 | 0 | 3.185994  | 5.379580  | 0.416385  |
| 95  | 6 | 0 | 3.797980  | 5.174509  | -1.648201 |
| 96  | 1 | 0 | 3.816426  | 6.244891  | -1.830823 |
| 97  | 6 | 0 | 4.112642  | 4.289158  | -2.677742 |
| 98  | 1 | 0 | 4.375390  | 4.672018  | -3.659535 |
| 99  | 6 | 0 | 4.087336  | 2.910002  | -2.454799 |
| 100 | 1 | 0 | 4.320423  | 2.216600  | -3.259834 |
| 101 | 6 | 0 | 3.756962  | 2.432414  | -1.193100 |

### AICBA *cis*-2 *b*

| Center<br>Number | Atomic<br>Number | Atomic<br>Type | Coordinates (Angstroms) |           |           |
|------------------|------------------|----------------|-------------------------|-----------|-----------|
|                  |                  |                | X                       | Y         | Z         |
| 1                | 6                | 0              | 1.226033                | 4.048653  | 1.656274  |
| 2                | 1                | 0              | 0.685065                | 4.597261  | 2.430257  |
| 3                | 6                | 0              | 1.617530                | 4.829554  | 0.424676  |
| 4                | 6                | 0              | 1.125449                | 5.998655  | -0.133308 |
| 5                | 1                | 0              | 0.343074                | 6.570625  | 0.359365  |
| 6                | 6                | 0              | 1.662205                | 6.424733  | -1.353651 |
| 7                | 1                | 0              | 1.306351                | 7.346852  | -1.804119 |
| 8                | 6                | 0              | 2.643970                | 5.675308  | -2.002693 |
| 9                | 1                | 0              | 3.041730                | 6.022351  | -2.951958 |
| 10               | 6                | 0              | 3.118844                | 4.481023  | -1.447852 |
| 11               | 1                | 0              | 3.870641                | 3.890669  | -1.966586 |
| 12               | 6                | 0              | 2.606434                | 4.077712  | -0.223743 |
| 13               | 6                | 0              | 2.834779                | 2.847175  | 0.623500  |
| 14               | 1                | 0              | 3.784968                | 2.338290  | 0.469939  |
| 15               | 6                | 0              | 2.570542                | 3.403821  | 2.034718  |
| 16               | 1                | 0              | 3.317607                | 4.142257  | 2.339103  |
| 17               | 1                | 0              | 2.482913                | 2.623186  | 2.798334  |
| 18               | 6                | 0              | -3.415312               | -2.776585 | 1.773392  |
| 19               | 6                | 0              | -2.779146               | -2.038152 | 2.845562  |
| 20               | 6                | 0              | -3.179091               | -0.738239 | 3.125753  |
| 21               | 6                | 0              | -4.232191               | -0.119825 | 2.346922  |
| 22               | 6                | 0              | -4.839262               | -0.825038 | 1.313014  |
| 23               | 6                | 0              | -4.421644               | -2.181757 | 1.020192  |
| 24               | 6                | 0              | -2.395308               | -3.578098 | 1.118477  |
| 25               | 6                | 0              | -1.134812               | -3.330242 | 1.792130  |
| 26               | 6                | 0              | -1.366533               | -2.381652 | 2.847957  |
| 27               | 6                | 0              | -0.413195               | -1.395867 | 3.092409  |
| 28               | 6                | 0              | -2.185848               | 0.281794  | 3.420555  |
| 29               | 6                | 0              | -3.890496               | 1.280669  | 2.165945  |
| 30               | 6                | 0              | -4.171281               | 1.915599  | 0.963793  |
| 31               | 6                | 0              | -4.798903               | 1.178939  | -0.116348 |
| 32               | 6                | 0              | -5.124967               | -0.161460 | 0.053542  |
| 33               | 6                | 0              | -4.880480               | -1.109858 | -1.016160 |
| 34               | 6                | 0              | -4.448104               | -2.359739 | -0.420333 |
| 35               | 6                | 0              | -3.473242               | -3.128684 | -1.045039 |
| 36               | 6                | 0              | -2.426147               | -3.751740 | -0.258375 |
| 37               | 6                | 0              | 0.045313                | -3.252669 | 1.052855  |
| 38               | 6                | 0              | 0.014375                | -3.437806 | -0.386222 |
| 39               | 6                | 0              | -1.195641               | -3.689365 | -1.028953 |
| 40               | 6                | 0              | -1.478947               | -3.035290 | -2.281507 |
| 41               | 6                | 0              | -2.884999               | -2.681271 | -2.295649 |
| 42               | 6                | 0              | -3.292765               | -1.478374 | -2.860067 |
| 43               | 6                | 0              | -4.311972               | -0.677138 | -2.209086 |
| 44               | 6                | 0              | -3.969519               | 0.721836  | -2.386003 |
| 45               | 6                | 0              | -4.211761               | 1.633239  | -1.364919 |
| 46               | 6                | 0              | -2.627693               | 1.520315  | 2.837332  |
| 47               | 6                | 0              | -0.781691               | 2.959544  | -1.090458 |
| 48               | 6                | 0              | -0.759051               | 3.138343  | 0.268400  |
| 49               | 6                | 0              | 0.426808                | 2.782816  | 1.153129  |
| 50               | 6                | 0              | 1.575763                | 1.905225  | 0.436735  |
| 51               | 6                | 0              | 1.252696                | 1.528688  | -0.998938 |
| 52               | 6                | 0              | -0.372964               | 1.409289  | -2.807218 |
| 53               | 6                | 0              | -1.783607               | 1.752246  | -2.832178 |
| 54               | 6                | 0              | -2.031916               | 2.706014  | -1.768154 |
| 55               | 6                | 0              | -3.227166               | 2.651475  | -1.054409 |
| 56               | 6                | 0              | -3.200841               | 2.823469  | 0.376389  |

|     |   |   |           |           |           |
|-----|---|---|-----------|-----------|-----------|
| 57  | 6 | 0 | -1.982574 | 3.044228  | 1.013764  |
| 58  | 6 | 0 | -0.288711 | 2.070660  | 2.288188  |
| 59  | 6 | 0 | 0.126104  | 0.872379  | 2.808162  |
| 60  | 6 | 0 | 1.174885  | 0.073512  | 2.132968  |
| 61  | 6 | 0 | 1.780167  | 0.499339  | 1.010005  |
| 62  | 6 | 0 | 2.304372  | -0.454100 | -0.075388 |
| 63  | 6 | 0 | 1.650497  | 0.196018  | -1.286311 |
| 64  | 6 | 0 | 1.062609  | -0.506373 | -2.319025 |
| 65  | 6 | 0 | 0.028055  | 0.101601  | -3.091806 |
| 66  | 6 | 0 | -2.731443 | 0.787150  | -3.138555 |
| 67  | 6 | 0 | -2.312600 | -0.576001 | -3.432172 |
| 68  | 6 | 0 | -0.966694 | -0.908361 | -3.407432 |
| 69  | 6 | 0 | -0.536178 | -2.162597 | -2.819371 |
| 70  | 6 | 0 | 0.721878  | -1.935390 | -2.148180 |
| 71  | 6 | 0 | 1.000531  | -2.567274 | -0.965239 |
| 72  | 6 | 0 | 1.907640  | -1.997105 | 0.126973  |
| 73  | 6 | 0 | 1.043256  | -2.269343 | 1.348716  |
| 74  | 6 | 0 | 0.808828  | -1.346984 | 2.332334  |
| 75  | 6 | 0 | -1.688436 | 2.380109  | 2.269926  |
| 76  | 6 | 0 | -0.831211 | -0.037861 | 3.384115  |
| 77  | 6 | 0 | 0.255172  | 2.130043  | -1.745078 |
| 78  | 6 | 0 | 3.887452  | -0.391267 | -0.201925 |
| 79  | 1 | 0 | 4.203509  | 0.633454  | -0.404427 |
| 80  | 6 | 0 | 4.290167  | -1.313981 | -1.326003 |
| 81  | 6 | 0 | 4.896172  | -0.940607 | -2.519395 |
| 82  | 1 | 0 | 5.138678  | 0.102904  | -2.708185 |
| 83  | 6 | 0 | 5.187189  | -1.919126 | -3.472689 |
| 84  | 1 | 0 | 5.666203  | -1.637679 | -4.405689 |
| 85  | 6 | 0 | 4.861466  | -3.253773 | -3.234040 |
| 86  | 1 | 0 | 5.086847  | -4.008029 | -3.982269 |
| 87  | 6 | 0 | 4.236911  | -3.625182 | -2.041140 |
| 88  | 1 | 0 | 3.965850  | -4.662468 | -1.858395 |
| 89  | 6 | 0 | 3.960344  | -2.651774 | -1.089992 |
| 90  | 6 | 0 | 3.241521  | -2.851996 | 0.219822  |
| 91  | 1 | 0 | 2.981013  | -3.899492 | 0.402467  |
| 92  | 6 | 0 | 4.066126  | -2.256585 | 1.335545  |
| 93  | 6 | 0 | 4.422664  | -2.882337 | 2.523536  |
| 94  | 1 | 0 | 4.129315  | -3.913005 | 2.709311  |
| 95  | 6 | 0 | 5.156840  | -2.172022 | 3.476567  |
| 96  | 1 | 0 | 5.443469  | -2.655053 | 4.406120  |
| 97  | 6 | 0 | 5.517858  | -0.846052 | 3.243064  |
| 98  | 1 | 0 | 6.085508  | -0.300224 | 3.991002  |
| 99  | 6 | 0 | 5.148183  | -0.213988 | 2.053098  |
| 100 | 1 | 0 | 5.420441  | 0.824162  | 1.873690  |
| 101 | 6 | 0 | 4.427848  | -0.924923 | 1.101608  |

### AICBA *cis*-3 *a*

| Center<br>Number | Atomic<br>Number | Atomic<br>Type | Coordinates (Angstroms) |           |           |
|------------------|------------------|----------------|-------------------------|-----------|-----------|
|                  |                  |                | X                       | Y         | Z         |
| 1                | 6                | 0              | -1.950938               | 3.760230  | 1.228133  |
| 2                | 1                | 0              | -2.245362               | 3.717996  | 2.279023  |
| 3                | 6                | 0              | -3.074528               | 3.744204  | 0.220285  |
| 4                | 6                | 0              | -4.401160               | 3.360516  | 0.310555  |
| 5                | 1                | 0              | -4.814371               | 2.987557  | 1.244067  |
| 6                | 6                | 0              | -5.198562               | 3.469364  | -0.835766 |
| 7                | 1                | 0              | -6.251467               | 3.202532  | -0.785142 |
| 8                | 6                | 0              | -4.661191               | 3.917563  | -2.041935 |
| 9                | 1                | 0              | -5.298405               | 3.990707  | -2.918729 |
| 10               | 6                | 0              | -3.311707               | 4.282644  | -2.134045 |
| 11               | 1                | 0              | -2.894375               | 4.629113  | -3.076198 |
| 12               | 6                | 0              | -2.535828               | 4.209223  | -0.988504 |
| 13               | 6                | 0              | -1.084244               | 4.526035  | -0.716865 |
| 14               | 1                | 0              | -0.590508               | 5.181677  | -1.437559 |
| 15               | 6                | 0              | -1.165967               | 4.998697  | 0.749313  |
| 16               | 1                | 0              | -1.741117               | 5.922156  | 0.857513  |
| 17               | 1                | 0              | -0.187999               | 5.113402  | 1.228026  |
| 18               | 6                | 0              | 3.775375                | -2.390903 | 1.741172  |
| 19               | 6                | 0              | 3.502481                | -3.101628 | 0.504218  |
| 20               | 6                | 0              | 4.028479                | -2.636846 | -0.694216 |
| 21               | 6                | 0              | 4.853702                | -1.446324 | -0.713450 |
| 22               | 6                | 0              | 5.112529                | -0.761595 | 0.468176  |
| 23               | 6                | 0              | 4.560932                | -1.242881 | 1.723174  |
| 24               | 6                | 0              | 2.578172                | -2.434495 | 2.555473  |
| 25               | 6                | 0              | 1.565448                | -3.170258 | 1.814124  |
| 26               | 6                | 0              | 2.134415                | -3.583289 | 0.558551  |
| 27               | 6                | 0              | 1.342083                | -3.558116 | -0.586956 |
| 28               | 6                | 0              | 3.209927                | -2.630254 | -1.895557 |
| 29               | 6                | 0              | 4.554387                | -0.710437 | -1.930455 |
| 30               | 6                | 0              | 4.528452                | 0.680215  | -1.911866 |
| 31               | 6                | 0              | 4.792059                | 1.392567  | -0.673960 |
| 32               | 6                | 0              | 5.076364                | 0.686735  | 0.487722  |
| 33               | 6                | 0              | 4.492098                | 1.099851  | 1.752985  |
| 34               | 6                | 0              | 4.182978                | -0.093515 | 2.519323  |
| 35               | 6                | 0              | 3.033964                | -0.136804 | 3.303259  |
| 36               | 6                | 0              | 2.214783                | -1.334156 | 3.319522  |
| 37               | 6                | 0              | 0.236448                | -2.757355 | 1.857795  |
| 38               | 6                | 0              | -0.143051               | -1.606072 | 2.655075  |
| 39               | 6                | 0              | 0.823688                | -0.917179 | 3.381083  |
| 40               | 6                | 0              | 0.790155                | 0.521260  | 3.394423  |

|     |   |   |           |           |           |
|-----|---|---|-----------|-----------|-----------|
| 41  | 6 | 0 | 2.146059  | 1.008319  | 3.352948  |
| 42  | 6 | 0 | 2.434441  | 2.144793  | 2.602923  |
| 43  | 6 | 0 | 3.634768  | 2.191268  | 1.793494  |
| 44  | 6 | 0 | 3.335322  | 2.930668  | 0.580227  |
| 45  | 6 | 0 | 3.912637  | 2.546310  | -0.626738 |
| 46  | 6 | 0 | 3.542796  | -1.444104 | -2.662667 |
| 47  | 6 | 0 | 0.760857  | 2.196686  | -2.481028 |
| 48  | 6 | 0 | 1.127773  | 1.106883  | -3.263950 |
| 49  | 6 | 0 | 0.310071  | -0.077412 | -3.237240 |
| 50  | 6 | 0 | -0.825481 | -0.106687 | -2.422255 |
| 51  | 6 | 0 | -1.205741 | 1.049681  | -1.649367 |
| 52  | 6 | 0 | -0.320128 | 3.159744  | -0.533428 |
| 53  | 6 | 0 | 1.191596  | 3.366530  | -0.507143 |
| 54  | 6 | 0 | 1.773637  | 2.932136  | -1.746343 |
| 55  | 6 | 0 | 3.108592  | 2.544673  | -1.820901 |
| 56  | 6 | 0 | 3.487664  | 1.393450  | -2.624765 |
| 57  | 6 | 0 | 2.518668  | 0.691449  | -3.328239 |
| 58  | 6 | 0 | 1.174599  | -1.228366 | -3.297447 |
| 59  | 6 | 0 | 0.854214  | -2.355837 | -2.546170 |
| 60  | 6 | 0 | -0.346308 | -2.386759 | -1.744171 |
| 61  | 6 | 0 | -1.165766 | -1.290492 | -1.681734 |
| 62  | 6 | 0 | -2.064501 | -0.941871 | -0.498562 |
| 63  | 6 | 0 | -1.806715 | 0.564576  | -0.390587 |
| 64  | 6 | 0 | -1.564909 | 1.219902  | 0.760061  |
| 65  | 6 | 0 | -0.938767 | 2.607729  | 0.842945  |
| 66  | 6 | 0 | 1.955858  | 3.350442  | 0.631893  |
| 67  | 6 | 0 | 1.384265  | 2.848968  | 1.902995  |
| 68  | 6 | 0 | 0.093657  | 2.386584  | 1.941728  |
| 69  | 6 | 0 | -0.207721 | 1.189528  | 2.680405  |
| 70  | 6 | 0 | -1.222970 | 0.451272  | 1.972509  |
| 71  | 6 | 0 | -1.205030 | -0.920872 | 1.972955  |
| 72  | 6 | 0 | -1.737686 | -1.776536 | 0.828513  |
| 73  | 6 | 0 | -0.584940 | -2.768559 | 0.681986  |
| 74  | 6 | 0 | -0.039741 | -3.152747 | -0.514718 |
| 75  | 6 | 0 | 2.545581  | -0.758986 | -3.349833 |
| 76  | 6 | 0 | 1.895407  | -3.073484 | -1.838843 |
| 77  | 6 | 0 | -0.442103 | 2.191242  | -1.695967 |
| 78  | 6 | 0 | -3.580650 | -1.218999 | -0.886957 |
| 79  | 1 | 0 | -3.827297 | -0.656669 | -1.793468 |
| 80  | 6 | 0 | -4.433329 | -0.817864 | 0.291077  |
| 81  | 6 | 0 | -5.429564 | 0.147739  | 0.294486  |
| 82  | 1 | 0 | -5.657480 | 0.696848  | -0.615271 |
| 83  | 6 | 0 | -6.127780 | 0.404957  | 1.477408  |
| 84  | 1 | 0 | -6.917670 | 1.152125  | 1.487045  |
| 85  | 6 | 0 | -5.815393 | -0.288795 | 2.645378  |
| 86  | 1 | 0 | -6.358153 | -0.078146 | 3.562294  |
| 87  | 6 | 0 | -4.812044 | -1.262010 | 2.639982  |
| 88  | 1 | 0 | -4.568041 | -1.809318 | 3.547460  |
| 89  | 6 | 0 | -4.136059 | -1.532479 | 1.457350  |
| 90  | 6 | 0 | -3.047355 | -2.556857 | 1.258886  |
| 91  | 1 | 0 | -2.837587 | -3.130685 | 2.167367  |
| 92  | 6 | 0 | -3.419353 | -3.437225 | 0.088085  |
| 93  | 6 | 0 | -3.436759 | -4.825977 | 0.072905  |
| 94  | 1 | 0 | -3.197488 | -5.386244 | 0.973768  |
| 95  | 6 | 0 | -3.758451 | -5.491871 | -1.112414 |
| 96  | 1 | 0 | -3.780237 | -6.577503 | -1.132299 |
| 97  | 6 | 0 | -4.044803 | -4.770229 | -2.270368 |
| 98  | 1 | 0 | -4.288725 | -5.296017 | -3.188767 |
| 99  | 6 | 0 | -4.012096 | -3.373606 | -2.257602 |
| 100 | 1 | 0 | -4.220361 | -2.807941 | -3.162829 |
| 101 | 6 | 0 | -3.705285 | -2.712500 | -1.075205 |

## AICBA cis-3 b

| Center Number | Atomic Number | Atomic Type | Coordinates (Angstroms) |           |           |
|---------------|---------------|-------------|-------------------------|-----------|-----------|
|               |               |             | X                       | Y         | Z         |
| 1             | 6             | 0           | 1.766194                | 3.789650  | -1.963270 |
| 2             | 1             | 0           | 1.993240                | 3.773925  | -3.031496 |
| 3             | 6             | 0           | 2.783293                | 4.462797  | -1.070592 |
| 4             | 6             | 0           | 4.131700                | 4.739920  | -1.233870 |
| 5             | 1             | 0           | 4.645706                | 4.506225  | -2.162922 |
| 6             | 6             | 0           | 4.818124                | 5.335676  | -0.169021 |
| 7             | 1             | 0           | 5.870746                | 5.580171  | -0.278694 |
| 8             | 6             | 0           | 4.168046                | 5.616100  | 1.033205  |
| 9             | 1             | 0           | 4.720806                | 6.076693  | 1.846959  |
| 10            | 6             | 0           | 2.813421                | 5.308330  | 1.204245  |
| 11            | 1             | 0           | 2.313718                | 5.509686  | 2.148579  |
| 12            | 6             | 0           | 2.130483                | 4.744637  | 0.137887  |
| 13            | 6             | 0           | 0.714466                | 4.240816  | -0.011538 |
| 14            | 1             | 0           | -0.020585               | 4.630575  | 0.696480  |
| 15            | 6             | 0           | 0.472521                | 4.495462  | -1.511131 |
| 16            | 1             | 0           | 0.470136                | 5.560631  | -1.758233 |
| 17            | 1             | 0           | -0.440174               | 4.022908  | -1.890332 |
| 18            | 6             | 0           | 1.005831                | -3.816664 | 2.431957  |
| 19            | 6             | 0           | 0.250611                | -4.426092 | 1.351497  |
| 20            | 6             | 0           | 0.875410                | -4.716739 | 0.145774  |
| 21            | 6             | 0           | 2.280684                | -4.414944 | -0.036645 |
| 22            | 6             | 0           | 3.004274                | -3.825291 | 0.993458  |
| 23            | 6             | 0           | 2.353083                | -3.518555 | 2.255713  |
| 24            | 6             | 0           | 0.138519                | -2.870639 | 3.104071  |

|     |   |   |           |           |           |
|-----|---|---|-----------|-----------|-----------|
| 25  | 6 | 0 | -1.152614 | -2.897400 | 2.433335  |
| 26  | 6 | 0 | -1.083752 | -3.854173 | 1.360487  |
| 27  | 6 | 0 | -1.729507 | -3.575137 | 0.158590  |
| 28  | 6 | 0 | 0.195376  | -4.445463 | -1.110201 |
| 29  | 6 | 0 | 2.471933  | -3.968661 | -1.406073 |
| 30  | 6 | 0 | 3.380637  | -2.952553 | -1.684687 |
| 31  | 6 | 0 | 4.129215  | -2.333380 | -0.605219 |
| 32  | 6 | 0 | 3.943567  | -2.761335 | 0.702442  |
| 33  | 6 | 0 | 3.864344  | -1.790129 | 1.781235  |
| 34  | 6 | 0 | 2.888580  | -2.265258 | 2.744835  |
| 35  | 6 | 0 | 2.057309  | -1.359176 | 3.394858  |
| 36  | 6 | 0 | 0.651299  | -1.670790 | 3.575948  |
| 37  | 6 | 0 | -1.864190 | -1.714633 | 2.247561  |
| 38  | 6 | 0 | -1.325116 | -0.459876 | 2.739151  |
| 39  | 6 | 0 | -0.100627 | -0.440313 | 3.400389  |
| 40  | 6 | 0 | 0.834255  | 0.614291  | 3.109161  |
| 41  | 6 | 0 | 2.163407  | 0.058274  | 3.107024  |
| 42  | 6 | 0 | 3.085637  | 0.510389  | 2.166806  |
| 43  | 6 | 0 | 3.957622  | -0.433767 | 1.498993  |
| 44  | 6 | 0 | 4.150750  | 0.017589  | 0.131925  |
| 45  | 6 | 0 | 4.248076  | -0.915852 | -0.897093 |
| 46  | 6 | 0 | 1.185127  | -3.991900 | -2.070993 |
| 47  | 6 | 0 | 1.559105  | 0.491937  | -2.958969 |
| 48  | 6 | 0 | 1.054294  | -0.708174 | -3.449361 |
| 49  | 6 | 0 | -0.341479 | -1.010378 | -3.262690 |
| 50  | 6 | 0 | -1.153474 | -0.097355 | -2.587062 |
| 51  | 6 | 0 | -0.612735 | 1.154103  | -2.119866 |
| 52  | 6 | 0 | 1.525358  | 2.341741  | -1.381912 |
| 53  | 6 | 0 | 2.787660  | 1.500709  | -1.249079 |
| 54  | 6 | 0 | 2.849936  | 0.519004  | -2.295895 |
| 55  | 6 | 0 | 3.576445  | -0.659437 | -2.143274 |
| 56  | 6 | 0 | 3.038352  | -1.916706 | -2.639159 |
| 57  | 6 | 0 | 1.806281  | -1.939175 | -3.277350 |
| 58  | 6 | 0 | -0.470294 | -2.418197 | -2.984745 |
| 59  | 6 | 0 | -1.412300 | -2.840787 | -2.050753 |
| 60  | 6 | 0 | -2.277229 | -1.887902 | -1.393996 |
| 61  | 6 | 0 | -2.149526 | -0.549196 | -1.653738 |
| 62  | 6 | 0 | -2.501675 | 0.563077  | -0.672274 |
| 63  | 6 | 0 | -1.297221 | 1.483840  | -0.856187 |
| 64  | 6 | 0 | -0.607861 | 2.053916  | 0.146173  |
| 65  | 6 | 0 | 0.782936  | 2.661949  | 0.006685  |
| 66  | 6 | 0 | 3.412465  | 1.244177  | -0.053389 |
| 67  | 6 | 0 | 2.732676  | 1.550779  | 1.227667  |
| 68  | 6 | 0 | 1.468201  | 2.082490  | 1.232332  |
| 69  | 6 | 0 | 0.494505  | 1.590064  | 2.169485  |
| 70  | 6 | 0 | -0.794598 | 1.567912  | 1.526187  |
| 71  | 6 | 0 | -1.695073 | 0.575240  | 1.815899  |
| 72  | 6 | 0 | -2.737797 | 0.059982  | 0.829341  |
| 73  | 6 | 0 | -2.562185 | -1.447260 | 1.021437  |
| 74  | 6 | 0 | -2.483389 | -2.355023 | -0.003417 |
| 75  | 6 | 0 | 0.858053  | -2.999126 | -2.988558 |
| 76  | 6 | 0 | -1.072833 | -3.880109 | -1.100751 |
| 77  | 6 | 0 | 0.710647  | 1.460164  | -2.319628 |
| 78  | 6 | 0 | -3.816448 | 1.312943  | -1.152915 |
| 79  | 1 | 0 | -3.673944 | 1.660799  | -2.181518 |
| 80  | 6 | 0 | -4.039074 | 2.446752  | -0.182883 |
| 81  | 6 | 0 | -3.997841 | 3.803893  | -0.476680 |
| 82  | 1 | 0 | -3.831971 | 4.137708  | -1.498766 |
| 83  | 6 | 0 | -4.169610 | 4.731613  | 0.553647  |
| 84  | 1 | 0 | -4.148400 | 5.794798  | 0.332219  |
| 85  | 6 | 0 | -4.365297 | 4.298938  | 1.864701  |
| 86  | 1 | 0 | -4.494507 | 5.026595  | 2.660490  |
| 87  | 6 | 0 | -4.393600 | 2.933792  | 2.160431  |
| 88  | 1 | 0 | -4.532972 | 2.593058  | 3.183790  |
| 89  | 6 | 0 | -4.238167 | 2.012247  | 1.132291  |
| 90  | 6 | 0 | -4.192500 | 0.509269  | 1.273767  |
| 91  | 1 | 0 | -4.369990 | 0.177681  | 2.301987  |
| 92  | 6 | 0 | -5.154220 | -0.109554 | 0.288569  |
| 93  | 6 | 0 | -6.125191 | -1.062413 | 0.570117  |
| 94  | 1 | 0 | -6.271336 | -1.410412 | 1.590094  |
| 95  | 6 | 0 | -6.905365 | -1.570635 | -0.471193 |
| 96  | 1 | 0 | -7.670845 | -2.311734 | -0.260573 |
| 97  | 6 | 0 | -6.701658 | -1.137075 | -1.780448 |
| 98  | 1 | 0 | -7.309012 | -1.541455 | -2.584896 |
| 99  | 6 | 0 | -5.714875 | -0.190047 | -2.064358 |
| 100 | 1 | 0 | -5.543154 | 0.139735  | -3.086479 |
| 101 | 6 | 0 | -4.949295 | 0.324873  | -1.025932 |

## Anthracene (in *m*-xylene, SMD)

| Center Number | Atomic Number | Atomic Type | Coordinates (Angstroms) |           |           |
|---------------|---------------|-------------|-------------------------|-----------|-----------|
|               |               |             | X                       | Y         | Z         |
| 1             | 6             | 0           | 3.653260                | -0.714753 | 0.000004  |
| 2             | 6             | 0           | 2.476222                | -1.406638 | -0.000001 |
| 3             | 6             | 0           | 1.219718                | -0.718773 | -0.000005 |
| 4             | 6             | 0           | 1.219719                | 0.718773  | -0.000002 |
| 5             | 6             | 0           | 2.476222                | 1.406638  | 0.000006  |
| 6             | 6             | 0           | 3.653260                | 0.714752  | 0.000008  |
| 7             | 6             | 0           | 0.000000                | -1.402089 | -0.000004 |
| 8             | 6             | 0           | 0.000000                | 1.402089  | -0.000005 |
| 9             | 6             | 0           | -1.219719               | 0.718773  | -0.000005 |

|    |   |   |           |           |           |
|----|---|---|-----------|-----------|-----------|
| 10 | 6 | 0 | -1.219719 | -0.718773 | -0.000001 |
| 11 | 6 | 0 | -2.476221 | -1.406638 | 0.000007  |
| 12 | 1 | 0 | -2.471225 | -2.494356 | 0.000012  |
| 13 | 6 | 0 | -3.653260 | -0.714752 | 0.000003  |
| 14 | 6 | 0 | -3.653260 | 0.714752  | 0.000000  |
| 15 | 6 | 0 | -2.476221 | 1.406638  | -0.000004 |
| 16 | 1 | 0 | -0.000001 | -2.491033 | -0.000007 |
| 17 | 1 | 0 | 4.599942  | -1.247591 | 0.000003  |
| 18 | 1 | 0 | 2.471225  | -2.494356 | -0.000013 |
| 19 | 1 | 0 | 2.471224  | 2.494356  | 0.000004  |
| 20 | 1 | 0 | 4.599942  | 1.247592  | 0.000016  |
| 21 | 1 | 0 | -0.000001 | 2.491033  | -0.000009 |
| 22 | 1 | 0 | -4.599942 | -1.247592 | 0.000008  |
| 23 | 1 | 0 | -4.599942 | 1.247592  | -0.000002 |
| 24 | 1 | 0 | -2.471225 | 2.494356  | -0.000012 |

### Indene (in *m*-xylene, SMD)

| Center Number | Atomic Number | Atomic Type | Coordinates (Angstroms) |           |           |
|---------------|---------------|-------------|-------------------------|-----------|-----------|
|               |               |             | X                       | Y         | Z         |
| 1             | 6             | 0           | -0.230355               | -0.686724 | 0.000009  |
| 2             | 6             | 0           | -1.664280               | -1.155881 | 0.000041  |
| 3             | 6             | 0           | -0.211419               | 0.720689  | 0.000004  |
| 4             | 6             | 0           | -2.435728               | 0.140809  | -0.000093 |
| 5             | 6             | 0           | -1.601809               | 1.196096  | 0.000053  |
| 6             | 6             | 0           | 0.955500                | -1.409010 | -0.000004 |
| 7             | 6             | 0           | 0.997877                | 1.414837  | -0.000005 |
| 8             | 6             | 0           | 2.168633                | -0.712779 | -0.000013 |
| 9             | 6             | 0           | 2.187819                | 0.684762  | -0.000010 |
| 10            | 1             | 0           | -1.898224               | -1.767870 | -0.881361 |
| 11            | 1             | 0           | -1.898239               | -1.767715 | 0.881555  |
| 12            | 1             | 0           | -3.519514               | 0.186087  | -0.000153 |
| 13            | 1             | 0           | -1.890301               | 2.242520  | 0.000090  |
| 14            | 1             | 0           | 0.946621                | -2.496755 | 0.000001  |
| 15            | 1             | 0           | 1.016644                | 2.501907  | 0.000010  |
| 16            | 1             | 0           | 3.105429                | -1.263108 | -0.000017 |
| 17            | 1             | 0           | 3.140152                | 1.208141  | -0.000006 |

### C<sub>60</sub> (in *m*-xylene, SMD)

| Center Number | Atomic Number | Atomic Type | Coordinates (Angstroms) |           |           |
|---------------|---------------|-------------|-------------------------|-----------|-----------|
|               |               |             | X                       | Y         | Z         |
| 1             | 6             | 0           | -3.520419               | 0.354175  | 0.162846  |
| 2             | 6             | 0           | -3.293342               | -0.775521 | 1.046430  |
| 3             | 6             | 0           | -2.656531               | -0.585561 | 2.265217  |
| 4             | 6             | 0           | -2.219501               | 0.742569  | 2.656807  |
| 5             | 6             | 0           | -2.436332               | 1.822391  | 1.811958  |
| 6             | 6             | 0           | -3.102942               | 1.624442  | 0.537308  |
| 7             | 6             | 0           | -3.329471               | -0.099603 | -1.202755 |
| 8             | 6             | 0           | -2.987083               | -1.510276 | -1.163080 |
| 9             | 6             | 0           | -2.962857               | -1.927511 | 0.227355  |
| 10            | 6             | 0           | -2.010402               | -2.839255 | 0.662950  |
| 11            | 6             | 0           | -1.661562               | -1.539377 | 2.721203  |
| 12            | 6             | 0           | -0.952411               | 0.609264  | 3.352031  |
| 13            | 6             | 0           | 0.041775                | 1.561677  | 3.176936  |
| 14            | 6             | 0           | -0.184983               | 2.689877  | 2.292592  |
| 15            | 6             | 0           | -1.396365               | 2.818696  | 1.626777  |
| 16            | 6             | 0           | -1.418878               | 3.235728  | 0.236716  |
| 17            | 6             | 0           | -2.472860               | 2.497585  | -0.436385 |
| 18            | 6             | 0           | -2.289311               | 2.063023  | -1.742046 |
| 19            | 6             | 0           | -2.726829               | 0.735422  | -2.133551 |
| 20            | 6             | 0           | -2.054506               | -2.021380 | -2.055651 |
| 21            | 6             | 0           | -1.425701               | -1.148064 | -3.030248 |
| 22            | 6             | 0           | -1.754326               | 0.199916  | -3.068042 |
| 23            | 6             | 0           | -0.714379               | 1.195625  | -3.253161 |
| 24            | 6             | 0           | -1.045901               | 2.348176  | -2.434880 |
| 25            | 6             | 0           | -0.039142               | 3.054585  | -1.791209 |
| 26            | 6             | 0           | -0.229882               | 3.508900  | -0.425600 |
| 27            | 6             | 0           | 1.036456                | 3.374061  | 0.271655  |
| 28            | 6             | 0           | 1.059069                | 2.975615  | 1.601065  |
| 29            | 6             | 0           | -0.608414               | -0.800446 | 3.393060  |
| 30            | 6             | 0           | 3.329471                | 0.099603  | 1.202755  |
| 31            | 6             | 0           | 2.726829                | -0.735422 | 2.133552  |
| 32            | 6             | 0           | 2.289311                | -2.063023 | 1.742046  |
| 33            | 6             | 0           | 2.472860                | -2.497585 | 0.436385  |
| 34            | 6             | 0           | 3.102942                | -1.624442 | -0.537308 |
| 35            | 6             | 0           | 3.293341                | 0.775521  | -1.046430 |
| 36            | 6             | 0           | 2.962857                | 1.927511  | -0.227355 |
| 37            | 6             | 0           | 2.987083                | 1.510277  | 1.163080  |
| 38            | 6             | 0           | 2.054506                | 2.021380  | 2.055651  |
| 39            | 6             | 0           | 1.425701                | 1.148064  | 3.030248  |
| 40            | 6             | 0           | 1.754326                | -0.199916 | 3.068042  |
| 41            | 6             | 0           | 1.045901                | -2.348176 | 2.434880  |
| 42            | 6             | 0           | 0.039142                | -3.054585 | 1.791209  |
| 43            | 6             | 0           | 0.229883                | -3.508900 | 0.425600  |
| 44            | 6             | 0           | 1.418878                | -3.235728 | -0.236716 |
| 45            | 6             | 0           | 1.396364                | -2.818696 | -1.626777 |
| 46            | 6             | 0           | 2.436332                | -1.822391 | -1.811958 |

|    |   |   |           |           |           |
|----|---|---|-----------|-----------|-----------|
| 47 | 6 | 0 | 2.219500  | -0.742570 | -2.656807 |
| 48 | 6 | 0 | 2.656531  | 0.585561  | -2.265217 |
| 49 | 6 | 0 | 2.010403  | 2.839255  | -0.662950 |
| 50 | 6 | 0 | 1.345043  | 2.640861  | -1.937633 |
| 51 | 6 | 0 | 1.661562  | 1.539377  | -2.721203 |
| 52 | 6 | 0 | 0.608414  | 0.800446  | -3.393060 |
| 53 | 6 | 0 | 0.952410  | -0.609265 | -3.352031 |
| 54 | 6 | 0 | -0.041775 | -1.561677 | -3.176936 |
| 55 | 6 | 0 | 0.184983  | -2.689876 | -2.292591 |
| 56 | 6 | 0 | -1.059069 | -2.975615 | -1.601065 |
| 57 | 6 | 0 | -1.036456 | -3.374061 | -0.271655 |
| 58 | 6 | 0 | 0.714379  | -1.195625 | 3.253161  |
| 59 | 6 | 0 | -1.345042 | -2.640861 | 1.937633  |
| 60 | 6 | 0 | 3.520419  | -0.354175 | -0.162846 |

### AC<sub>60</sub>MA (in *m*-xylene, SMD)

| Center Number | Atomic Number | Atomic Type | Coordinates (Angstroms) |           |           |
|---------------|---------------|-------------|-------------------------|-----------|-----------|
|               |               |             | X                       | Y         | Z         |
| 1             | 6             | 0           | -2.467113               | 0.000008  | -0.801214 |
| 2             | 6             | 0           | -2.467112               | -0.000008 | 0.801216  |
| 3             | 6             | 0           | -1.707917               | -1.169662 | 1.427841  |
| 4             | 6             | 0           | -1.281465               | -2.276628 | 0.740740  |
| 5             | 6             | 0           | -1.281465               | -2.276612 | -0.740789 |
| 6             | 6             | 0           | -1.707916               | -1.169631 | -1.427865 |
| 7             | 6             | 0           | -0.962939               | 0.725196  | -2.573455 |
| 8             | 6             | 0           | -0.962939               | 0.725252  | -2.573439 |
| 9             | 6             | 0           | -1.707918               | 1.169662  | -1.427840 |
| 10            | 6             | 0           | -1.281466               | 2.276627  | -0.740739 |
| 11            | 6             | 0           | -1.281465               | 2.276611  | 0.740790  |
| 12            | 6             | 0           | -1.707916               | 1.169631  | 1.427866  |
| 13            | 6             | 0           | -0.962937               | 0.725195  | 2.573456  |
| 14            | 6             | 0           | -0.962937               | -0.725252 | 2.573440  |
| 15            | 6             | 0           | 0.153475                | -1.423148 | 3.026686  |
| 16            | 6             | 0           | 0.594711                | -2.590590 | 2.307822  |
| 17            | 6             | 0           | -0.107650               | -2.995979 | 1.175300  |
| 18            | 6             | 0           | 0.617534                | -3.439984 | -0.000038 |
| 19            | 6             | 0           | -0.107650               | -2.995953 | -1.175366 |
| 20            | 6             | 0           | 0.594710                | -2.590539 | -2.307879 |
| 21            | 6             | 0           | 0.153473                | -1.423081 | -3.026717 |
| 22            | 6             | 0           | 1.326407                | -0.693383 | -3.478695 |
| 23            | 6             | 0           | 1.326407                | 0.693460  | -3.478680 |
| 24            | 6             | 0           | 0.153472                | 1.423148  | -3.026685 |
| 25            | 6             | 0           | 0.594710                | 2.590590  | -2.307822 |
| 26            | 6             | 0           | -0.107651               | 2.995978  | -1.175300 |
| 27            | 6             | 0           | 0.617534                | 3.439984  | 0.000038  |
| 28            | 6             | 0           | -0.107650               | 2.995953  | 1.175366  |
| 29            | 6             | 0           | 0.594712                | 2.590539  | 2.307879  |
| 30            | 6             | 0           | 0.153475                | 1.423081  | 3.026717  |
| 31            | 6             | 0           | 1.326409                | 0.693383  | 3.478694  |
| 32            | 6             | 0           | 1.326409                | -0.693460 | 3.478679  |
| 33            | 6             | 0           | 2.498648                | -1.421419 | 3.031347  |
| 34            | 6             | 0           | 2.045190                | -2.594240 | 2.303269  |
| 35            | 6             | 0           | 2.736426                | -3.019038 | 1.175767  |
| 36            | 6             | 0           | 2.004977                | -3.457848 | -0.000039 |
| 37            | 6             | 0           | 2.736425                | -3.019012 | -1.175835 |
| 38            | 6             | 0           | 2.045188                | -2.594189 | -2.303328 |
| 39            | 6             | 0           | 2.498646                | -1.421352 | -3.031381 |
| 40            | 6             | 0           | 3.621019                | -0.726165 | -2.598888 |
| 41            | 6             | 0           | 3.621019                | 0.726222  | -2.598872 |
| 42            | 6             | 0           | 2.498646                | 1.421419  | -3.031349 |
| 43            | 6             | 0           | 2.045188                | 2.594240  | -2.303270 |
| 44            | 6             | 0           | 2.736425                | 3.019038  | -1.175769 |
| 45            | 6             | 0           | 2.004977                | 3.457848  | 0.000037  |
| 46            | 6             | 0           | 2.736426                | 3.019012  | 1.175833  |
| 47            | 6             | 0           | 2.045190                | 2.594189  | 2.303326  |
| 48            | 6             | 0           | 2.498648                | 1.421352  | 3.031379  |
| 49            | 6             | 0           | 3.621021                | 0.726165  | 2.598886  |
| 50            | 6             | 0           | 3.621021                | -0.726222 | 2.598870  |
| 51            | 6             | 0           | 4.342802                | -1.173909 | 1.422362  |
| 52            | 6             | 0           | 3.908856                | -2.295544 | 0.727024  |
| 53            | 6             | 0           | 3.908855                | -2.295528 | -0.727078 |
| 54            | 6             | 0           | 4.342802                | -1.173878 | -1.422390 |
| 55            | 6             | 0           | 4.788189                | 0.000008  | -0.694169 |
| 56            | 6             | 0           | 4.342801                | 1.173909  | -1.422365 |
| 57            | 6             | 0           | 3.908855                | 2.295544  | -0.727027 |
| 58            | 6             | 0           | 3.908855                | 2.295528  | 0.727075  |
| 59            | 6             | 0           | 4.342803                | 1.173878  | 1.422387  |
| 60            | 6             | 0           | 4.788189                | -0.000008 | 0.694166  |
| 61            | 6             | 0           | -3.977301               | 0.000008  | -1.293814 |
| 62            | 1             | 0           | -3.997669               | 0.000014  | -2.387831 |
| 63            | 6             | 0           | -4.623695               | 1.228639  | -0.699845 |
| 64            | 6             | 0           | -5.143673               | 2.308481  | -1.403391 |
| 65            | 1             | 0           | -5.131534               | 2.310845  | -2.490994 |
| 66            | 6             | 0           | -5.679111               | 3.388510  | -0.697189 |
| 67            | 1             | 0           | -6.095034               | 4.234081  | -1.237724 |
| 68            | 6             | 0           | -5.679108               | 3.388503  | 0.697231  |
| 69            | 1             | 0           | -6.095028               | 4.234070  | 1.237776  |
| 70            | 6             | 0           | -5.143664               | 2.308469  | 1.403421  |
| 71            | 1             | 0           | -5.131521               | 2.310823  | 2.491024  |
| 72            | 6             | 0           | -4.623691               | 1.228633  | 0.699863  |

|    |   |   |           |           |           |
|----|---|---|-----------|-----------|-----------|
| 73 | 6 | 0 | -3.977301 | -0.000008 | 1.293817  |
| 74 | 1 | 0 | -3.997669 | -0.000014 | 2.387834  |
| 75 | 6 | 0 | -4.623696 | -1.228639 | 0.699848  |
| 76 | 6 | 0 | -5.143673 | -2.308480 | 1.403395  |
| 77 | 1 | 0 | -5.131534 | -2.310844 | 2.490997  |
| 78 | 6 | 0 | -5.679113 | -3.388509 | 0.697193  |
| 79 | 1 | 0 | -6.095036 | -4.234080 | 1.237728  |
| 80 | 6 | 0 | -5.679109 | -3.388503 | -0.697227 |
| 81 | 1 | 0 | -6.095029 | -4.234069 | -1.237772 |
| 82 | 6 | 0 | -5.143665 | -2.308469 | -1.403417 |
| 83 | 1 | 0 | -5.131522 | -2.310824 | -2.491020 |
| 84 | 6 | 0 | -4.623692 | -1.228633 | -0.699860 |

### C<sub>70</sub> (in *m*-xylene, SMD)

| Center<br>Number | Atomic<br>Number | Atomic<br>Type | Coordinates (Angstroms) |           |           |
|------------------|------------------|----------------|-------------------------|-----------|-----------|
|                  |                  |                | X                       | Y         | Z         |
| 1                | 6                | 0              | 1.201756                | -3.376529 | 0.747402  |
| 2                | 6                | 0              | -0.000033               | -3.228699 | 1.481138  |
| 3                | 6                | 0              | -1.201815               | -3.376523 | 0.747381  |
| 4                | 6                | 0              | -1.201746               | -3.390242 | -0.678597 |
| 5                | 6                | 0              | 0.000000                | -3.260537 | -1.416252 |
| 6                | 6                | 0              | 1.201700                | -3.390302 | -0.678573 |
| 7                | 6                | 0              | 2.440207                | -2.784689 | -1.133232 |
| 8                | 6                | 0              | 3.219978                | -2.406180 | 0.024366  |
| 9                | 6                | 0              | 2.440350                | -2.761426 | 1.189668  |
| 10               | 6                | 0              | 2.439909                | -1.938117 | 2.297407  |
| 11               | 6                | 0              | 1.201734                | -1.693229 | 3.014304  |
| 12               | 6                | 0              | -0.000023               | -2.353792 | 2.661713  |
| 13               | 6                | 0              | -1.201804               | -1.693213 | 3.014299  |
| 14               | 6                | 0              | -2.440032               | -1.938093 | 2.297335  |
| 15               | 6                | 0              | -2.440439               | -2.761426 | 1.189617  |
| 16               | 6                | 0              | -3.220021               | -2.406134 | 0.024327  |
| 17               | 6                | 0              | -2.440247               | -2.784649 | -1.133269 |
| 18               | 6                | 0              | -2.440458               | -1.984655 | -2.258000 |
| 19               | 6                | 0              | -1.201603               | -1.753616 | -2.978557 |
| 20               | 6                | 0              | 0.000014                | -2.407055 | -2.612671 |
| 21               | 6                | 0              | 1.201621                | -1.753649 | -2.978544 |
| 22               | 6                | 0              | 2.440452                | -1.984729 | -2.257967 |
| 23               | 6                | 0              | 3.220161                | -0.766826 | -2.280388 |
| 24               | 6                | 0              | 3.967085                | -0.393293 | -1.169253 |
| 25               | 6                | 0              | 3.966497                | -1.233644 | 0.012270  |
| 26               | 6                | 0              | 3.966294                | -0.369355 | 1.176532  |
| 27               | 6                | 0              | 3.219074                | -0.720073 | 2.294563  |
| 28               | 6                | 0              | 2.439879                | 0.278270  | 2.992394  |
| 29               | 6                | 0              | 1.201740                | -0.332413 | 3.440862  |
| 30               | 6                | 0              | -0.000026               | 0.411178  | 3.527180  |
| 31               | 6                | 0              | -1.201785               | -0.332389 | 3.440856  |
| 32               | 6                | 0              | -2.439925               | 0.278291  | 2.992372  |
| 33               | 6                | 0              | -3.219140               | -0.720043 | 2.294482  |
| 34               | 6                | 0              | -3.966357               | -0.369286 | 1.176507  |
| 35               | 6                | 0              | -3.966553               | -1.233593 | 0.012223  |
| 36               | 6                | 0              | -3.967049               | -0.393242 | -1.169315 |
| 37               | 6                | 0              | -3.220141               | -0.766801 | -2.280430 |
| 38               | 6                | 0              | -2.440340               | 0.217300  | -2.997905 |
| 39               | 6                | 0              | -1.201394               | -0.401811 | -3.432051 |
| 40               | 6                | 0              | 0.000022                | 0.339943  | -3.535326 |
| 41               | 6                | 0              | 1.201477                | -0.401842 | -3.432055 |
| 42               | 6                | 0              | 2.440382                | 0.217278  | -2.997855 |
| 43               | 6                | 0              | 2.440120                | 1.534102  | -2.584512 |
| 44               | 6                | 0              | 3.220184                | 1.932079  | -1.433706 |
| 45               | 6                | 0              | 3.966499                | 0.990344  | -0.734968 |
| 46               | 6                | 0              | 3.966657                | 1.005260  | 0.714818  |
| 47               | 6                | 0              | 3.219528                | 1.960503  | 1.394008  |
| 48               | 6                | 0              | 2.440266                | 1.586629  | 2.553382  |
| 49               | 6                | 0              | 1.201917                | 2.343974  | 2.541739  |
| 50               | 6                | 0              | -0.000002               | 1.803536  | 3.059661  |
| 51               | 6                | 0              | -1.201904               | 2.344001  | 2.541710  |
| 52               | 6                | 0              | -2.440283               | 1.586653  | 2.553350  |
| 53               | 6                | 0              | -3.219534               | 1.960557  | 1.393968  |
| 54               | 6                | 0              | -3.966661               | 1.005336  | 0.714772  |
| 55               | 6                | 0              | -3.966446               | 0.990377  | -0.735020 |
| 56               | 6                | 0              | -3.220113               | 1.932137  | -1.433753 |
| 57               | 6                | 0              | -2.440034               | 1.534139  | -2.584519 |
| 58               | 6                | 0              | -1.201699               | 2.291612  | -2.587964 |
| 59               | 6                | 0              | 0.000038                | 1.742557  | -3.097206 |
| 60               | 6                | 0              | 1.201796                | 2.291587  | -2.587962 |
| 61               | 6                | 0              | 1.202021                | 3.142531  | -1.443500 |
| 62               | 6                | 0              | 2.440713                | 2.919493  | -0.719762 |
| 63               | 6                | 0              | 2.440209                | 2.932798  | 0.660292  |
| 64               | 6                | 0              | 1.201891                | 3.170863  | 1.379643  |
| 65               | 6                | 0              | 0.000010                | 3.484799  | 0.699717  |
| 66               | 6                | 0              | -1.201868               | 3.170872  | 1.379583  |
| 67               | 6                | 0              | -2.440197               | 2.932845  | 0.660236  |
| 68               | 6                | 0              | -2.440630               | 2.919502  | -0.719800 |
| 69               | 6                | 0              | -1.201920               | 3.142544  | -1.443513 |
| 70               | 6                | 0              | 0.000044                | 3.468207  | -0.769651 |

### AC<sub>70</sub>MA isomer *a* (in *m*-xylene, SMD)

| Center<br>Number | Atomic<br>Number | Atomic<br>Type | Coordinates (Angstroms) |           |           |
|------------------|------------------|----------------|-------------------------|-----------|-----------|
|                  |                  |                | X                       | Y         | Z         |
| 1                | 6                | 0              | 3.338955                | 2.559345  | 1.661315  |
| 2                | 6                | 0              | 2.019759                | 3.070494  | 1.687388  |
| 3                | 6                | 0              | 1.172147                | 2.558793  | 2.699898  |
| 4                | 6                | 0              | 1.537831                | 1.410859  | 3.463104  |
| 5                | 6                | 0              | 2.762260                | 0.734947  | 3.231678  |
| 6                | 6                | 0              | 3.705314                | 1.410177  | 2.421919  |
| 7                | 6                | 0              | 4.722802                | 0.689757  | 1.675729  |
| 8                | 6                | 0              | 5.003085                | 1.412975  | 0.456087  |
| 9                | 6                | 0              | 4.131201                | 2.565053  | 0.443830  |
| 10               | 6                | 0              | 3.568506                | 2.995606  | -0.740511 |
| 11               | 6                | 0              | 2.185392                | 3.436051  | -0.762970 |
| 12               | 6                | 0              | 1.417349                | 3.517424  | 0.423452  |
| 13               | 6                | 0              | 0.012635                | 3.405627  | 0.270539  |
| 14               | 6                | 0              | -0.837742               | 2.963769  | 1.356435  |
| 15               | 6                | 0              | -0.272685               | 2.561082  | 2.555695  |
| 16               | 6                | 0              | -0.803725               | 1.416714  | 3.231768  |
| 17               | 6                | 0              | 0.320433                | 0.689802  | 3.783883  |
| 18               | 6                | 0              | 0.320424                | -0.690035 | 3.783831  |
| 19               | 6                | 0              | 1.537819                | -1.411080 | 3.463013  |
| 20               | 6                | 0              | 2.762251                | -0.735162 | 3.231626  |
| 21               | 6                | 0              | 3.705302                | -1.410348 | 2.421827  |
| 22               | 6                | 0              | 4.722795                | -0.689888 | 1.675684  |
| 23               | 6                | 0              | 5.003070                | -1.413028 | 0.455996  |
| 24               | 6                | 0              | 5.272110                | -0.724066 | -0.723041 |
| 25               | 6                | 0              | 5.272112                | 0.724084  | -0.722993 |
| 26               | 6                | 0              | 4.678400                | 1.173398  | -1.966732 |
| 27               | 6                | 0              | 3.846813                | 2.287477  | -1.970964 |
| 28               | 6                | 0              | 2.620829                | 2.278666  | -2.737461 |
| 29               | 6                | 0              | 1.605150                | 2.995421  | -1.989317 |
| 30               | 6                | 0              | 0.239567                | 2.630929  | -2.068497 |
| 31               | 6                | 0              | -0.568121               | 2.968757  | -0.955293 |
| 32               | 6                | 0              | -1.792155               | 2.257629  | -0.653756 |
| 33               | 6                | 0              | -1.968427               | 2.262646  | 0.807056  |
| 34               | 6                | 0              | -2.488661               | 1.166320  | 1.449856  |
| 35               | 6                | 0              | -1.878331               | 0.722615  | 2.669023  |
| 36               | 6                | 0              | -1.878335               | -0.722762 | 2.668977  |
| 37               | 6                | 0              | -0.803741               | -1.416909 | 3.231682  |
| 38               | 6                | 0              | -0.272705               | -2.561236 | 2.555531  |
| 39               | 6                | 0              | 1.172126                | -2.558963 | 2.699732  |
| 40               | 6                | 0              | 2.019734                | -3.070607 | 1.687190  |
| 41               | 6                | 0              | 3.338932                | -2.559463 | 1.661148  |
| 42               | 6                | 0              | 4.131184                | -2.565103 | 0.443665  |
| 43               | 6                | 0              | 3.568480                | -2.995567 | -0.740703 |
| 44               | 6                | 0              | 3.846797                | -2.287365 | -1.971112 |
| 45               | 6                | 0              | 4.678390                | -1.173295 | -1.966807 |
| 46               | 6                | 0              | 4.313729                | 0.000080  | -2.739495 |
| 47               | 6                | 0              | 3.135845                | 0.000106  | -3.476468 |
| 48               | 6                | 0              | 2.273762                | 1.162743  | -3.474572 |
| 49               | 6                | 0              | 0.895417                | 0.713584  | -3.491039 |
| 50               | 6                | 0              | -0.125075               | 1.448330  | -2.841449 |
| 51               | 6                | 0              | -1.269274               | 0.712634  | -2.435033 |
| 52               | 6                | 0              | -2.139430               | 1.158737  | -1.380360 |
| 53               | 6                | 0              | -2.972957               | 0.000037  | -0.849104 |
| 54               | 6                | 0              | -3.176148               | -0.000003 | 0.740447  |
| 55               | 6                | 0              | -2.488680               | -1.166390 | 1.449787  |
| 56               | 6                | 0              | -1.968438               | -2.262660 | 0.806907  |
| 57               | 6                | 0              | -0.837759               | -2.963836 | 1.356241  |
| 58               | 6                | 0              | 0.012607                | -3.405639 | 0.270320  |
| 59               | 6                | 0              | 1.417321                | -3.517448 | 0.423224  |
| 60               | 6                | 0              | 2.185366                | -3.436008 | -0.763192 |
| 61               | 6                | 0              | 1.605128                | -2.995290 | -1.989508 |
| 62               | 6                | 0              | 2.620810                | -2.278500 | -2.737611 |
| 63               | 6                | 0              | 2.273756                | -1.162525 | -3.474646 |
| 64               | 6                | 0              | 0.895412                | -0.713358 | -3.491092 |
| 65               | 6                | 0              | -0.125080               | -1.448133 | -2.841537 |
| 66               | 6                | 0              | -1.269275               | -0.712449 | -2.435080 |
| 67               | 6                | 0              | -2.139411               | -1.158611 | -1.380427 |
| 68               | 6                | 0              | -1.792183               | -2.257576 | -0.653904 |
| 69               | 6                | 0              | -0.568148               | -2.968685 | -0.955487 |
| 70               | 6                | 0              | 0.239542                | -2.630791 | -2.068666 |
| 71               | 6                | 0              | -4.410626               | 0.000020  | -1.529073 |
| 72               | 1                | 0              | -4.295164               | 0.000044  | -2.616874 |
| 73               | 6                | 0              | -5.126001               | 1.228688  | -1.020480 |
| 74               | 6                | 0              | -5.551500               | 2.309271  | -1.783523 |
| 75               | 1                | 0              | -5.404540               | 2.311398  | -2.861194 |
| 76               | 6                | 0              | -6.164953               | 3.392795  | -1.149086 |
| 77               | 1                | 0              | -6.504399               | 4.240325  | -1.737743 |
| 78               | 6                | 0              | -6.336183               | 3.394659  | 0.234924  |
| 79               | 1                | 0              | -6.810102               | 4.242896  | 0.720522  |
| 80               | 6                | 0              | -5.897061               | 2.312741  | 1.002511  |
| 81               | 1                | 0              | -6.019133               | 2.316031  | 2.083299  |
| 82               | 6                | 0              | -5.299958               | 1.229536  | 0.368626  |
| 83               | 6                | 0              | -4.733154               | -0.000004 | 1.037918  |
| 84               | 1                | 0              | -4.891516               | -0.000022 | 2.120561  |
| 85               | 6                | 0              | -5.299961               | -1.229523 | 0.368588  |
| 86               | 6                | 0              | -5.897072               | -2.312736 | 1.002456  |
| 87               | 1                | 0              | -6.019150               | -2.316037 | 2.083243  |

|    |   |   |           |           |           |
|----|---|---|-----------|-----------|-----------|
| 88 | 6 | 0 | -6.336171 | -3.394653 | 0.234858  |
| 89 | 1 | 0 | -6.810089 | -4.242898 | 0.720441  |
| 90 | 6 | 0 | -6.164927 | -3.392776 | -1.149154 |
| 91 | 1 | 0 | -6.504362 | -4.240304 | -1.737819 |
| 92 | 6 | 0 | -5.551464 | -2.309249 | -1.783569 |
| 93 | 1 | 0 | -5.404487 | -2.311359 | -2.861239 |
| 94 | 6 | 0 | -5.125974 | -1.228669 | -1.020513 |

### ICMA (in *m*-xylene, SMD)

| Center Number | Atomic Number | Atomic Type | Coordinates (Angstroms) |           |           |
|---------------|---------------|-------------|-------------------------|-----------|-----------|
|               |               |             | X                       | Y         | Z         |
| 1             | 6             | 0           | -4.197722               | -1.411232 | -1.132343 |
| 2             | 1             | 0           | -4.305547               | -1.755271 | -2.162745 |
| 3             | 6             | 0           | -5.110551               | -0.286871 | -0.701110 |
| 4             | 6             | 0           | -5.818278               | 0.668012  | -1.415451 |
| 5             | 1             | 0           | -5.808696               | 0.679565  | -2.502761 |
| 6             | 6             | 0           | -6.555635               | 1.617601  | -0.697610 |
| 7             | 1             | 0           | -7.133087               | 2.365725  | -1.233465 |
| 8             | 6             | 0           | -6.555647               | 1.617444  | 0.697852  |
| 9             | 1             | 0           | -7.133109               | 2.365446  | 1.233865  |
| 10            | 6             | 0           | -5.818303               | 0.667695  | 1.415492  |
| 11            | 1             | 0           | -5.808739               | 0.679006  | 2.502805  |
| 12            | 6             | 0           | -5.110564               | -0.287029 | 0.700950  |
| 13            | 6             | 0           | -4.197739               | -1.411485 | 1.131947  |
| 14            | 1             | 0           | -4.305582               | -1.755753 | 2.162271  |
| 15            | 6             | 0           | -4.439955               | -2.429355 | -0.000311 |
| 16            | 1             | 0           | -5.461556               | -2.818635 | -0.000361 |
| 17            | 1             | 0           | -3.729867               | -3.263151 | -0.000398 |
| 18            | 6             | 0           | 0.345250                | -3.231353 | -1.176320 |
| 19            | 6             | 0           | -0.976672               | -2.846894 | -0.741427 |
| 20            | 6             | 0           | -1.684876               | -1.895023 | -1.431205 |
| 21            | 6             | 0           | -1.082622               | -1.269368 | -2.576683 |
| 22            | 6             | 0           | 0.179957                | -1.645532 | -3.027416 |
| 23            | 6             | 0           | 0.914511                | -2.655025 | -2.309399 |
| 24            | 6             | 0           | 1.160884                | -3.470606 | -0.000384 |
| 25            | 6             | 0           | 0.345227                | -3.231621 | 1.175591  |
| 26            | 6             | 0           | -0.976686               | -2.847065 | 0.740759  |
| 27            | 6             | 0           | -1.684901               | -1.895349 | 1.430739  |
| 28            | 6             | 0           | -2.718060               | -0.962302 | -0.803429 |
| 29            | 6             | 0           | -1.467213               | 0.129025  | -2.578233 |
| 30            | 6             | 0           | -0.572720               | 1.096602  | -3.028945 |
| 31            | 6             | 0           | 0.751763                | 0.704383  | -3.481139 |
| 32            | 6             | 0           | 1.118860                | -0.633027 | -3.481227 |
| 33            | 6             | 0           | 2.441892                | -1.024014 | -3.031575 |
| 34            | 6             | 0           | 2.314373                | -2.275017 | -2.304658 |
| 35            | 6             | 0           | 3.092399                | -2.503378 | -1.176802 |
| 36            | 6             | 0           | 2.503150                | -3.119011 | -0.000331 |
| 37            | 6             | 0           | 0.914466                | -2.655547 | 2.308811  |
| 38            | 6             | 0           | 2.314327                | -2.275538 | 2.304180  |
| 39            | 6             | 0           | 3.092373                | -2.503640 | 1.176288  |
| 40            | 6             | 0           | 4.032888                | -1.497546 | 0.726948  |
| 41            | 6             | 0           | 4.032905                | -1.497383 | -0.727219 |
| 42            | 6             | 0           | 4.153754                | -0.299914 | -1.420713 |
| 43            | 6             | 0           | 3.340975                | -0.057525 | -2.598074 |
| 44            | 6             | 0           | 2.956081                | 1.342832  | -2.597645 |
| 45            | 6             | 0           | 1.689641                | 1.715581  | -3.031080 |
| 46            | 6             | 0           | -2.305717               | 0.360699  | -1.434813 |
| 47            | 6             | 0           | 0.674032                | 3.549344  | 0.000409  |
| 48            | 6             | 0           | -0.657975               | 3.161332  | 0.000353  |
| 49            | 6             | 0           | -1.240222               | 2.542347  | 1.176241  |
| 50            | 6             | 0           | -0.456568               | 2.337507  | 2.309593  |
| 51            | 6             | 0           | 0.941285                | 2.725781  | 2.305159  |
| 52            | 6             | 0           | 2.816297                | 2.931399  | 0.727439  |
| 53            | 6             | 0           | 2.816312                | 2.931566  | -0.726720 |
| 54            | 6             | 0           | 1.494892                | 3.318042  | -1.176011 |
| 55            | 6             | 0           | 0.941331                | 2.726301  | -2.304521 |
| 56            | 6             | 0           | -0.456521               | 2.338030  | -2.309067 |
| 57            | 6             | 0           | -1.240196               | 2.542608  | -1.175682 |
| 58            | 6             | 0           | -2.183299               | 1.539102  | 0.741453  |
| 59            | 6             | 0           | -2.305745               | 0.360375  | 1.434853  |
| 60            | 6             | 0           | -1.467265               | 0.128437  | 2.578236  |
| 61            | 6             | 0           | -0.572776               | 1.095912  | 3.029179  |
| 62            | 6             | 0           | 0.751697                | 0.703592  | 3.481314  |
| 63            | 6             | 0           | 1.689581                | 1.714893  | 3.031498  |
| 64            | 6             | 0           | 2.956027                | 1.342240  | 2.598004  |
| 65            | 6             | 0           | 3.532564                | 1.964932  | 1.422135  |
| 66            | 6             | 0           | 3.532591                | 1.965257  | -1.421620 |
| 67            | 6             | 0           | 4.273589                | 0.950638  | -0.693902 |
| 68            | 6             | 0           | 4.273574                | 0.950479  | 0.694201  |
| 69            | 6             | 0           | 4.153723                | -0.300237 | 1.420720  |
| 70            | 6             | 0           | 3.340920                | -0.058117 | 2.598122  |
| 71            | 6             | 0           | 2.441836                | -1.024705 | 3.031393  |
| 72            | 6             | 0           | 1.118794                | -0.633818 | 3.481104  |
| 73            | 6             | 0           | 0.179898                | -1.646220 | 3.027047  |
| 74            | 6             | 0           | -1.082674               | -1.269955 | 2.576374  |
| 75            | 6             | 0           | -2.183283               | 1.539268  | -0.741140 |
| 76            | 6             | 0           | -2.718073               | -0.962484 | 0.803158  |
| 77            | 6             | 0           | 1.494868                | 3.317774  | 1.176793  |

### AICBA e-face a (in *m*-xylene, SMD)

| Center Number | Atomic Number | Atomic Type | Coordinates (Angstroms) |           |           |
|---------------|---------------|-------------|-------------------------|-----------|-----------|
|               |               |             | X                       | Y         | Z         |
| 1             | 6             | 0           | -0.874722               | 4.706165  | -1.131565 |
| 2             | 1             | 0           | -1.153732               | 4.933726  | -2.162399 |
| 3             | 6             | 0           | 0.509931                | 5.133263  | -0.701268 |
| 4             | 6             | 0           | 1.662897                | 5.422891  | -1.415478 |
| 5             | 1             | 0           | 1.669952                | 5.408329  | -2.502767 |
| 6             | 6             | 0           | 2.822863                | 5.740429  | -0.697837 |
| 7             | 1             | 0           | 3.734045                | 5.990148  | -1.234442 |
| 8             | 6             | 0           | 2.822855                | 5.740440  | 0.697773  |
| 9             | 1             | 0           | 3.734032                | 5.990165  | 1.234384  |
| 10            | 6             | 0           | 1.662882                | 5.422911  | 1.415406  |
| 11            | 1             | 0           | 1.669924                | 5.408365  | 2.502695  |
| 12            | 6             | 0           | 0.509924                | 5.133274  | 0.701186  |
| 13            | 6             | 0           | -0.874734               | 4.706183  | 1.131475  |
| 14            | 1             | 0           | -1.153755               | 4.933762  | 2.162302  |
| 15            | 6             | 0           | -1.727184               | 5.312239  | -0.000055 |
| 16            | 1             | 0           | -1.705246               | 6.405448  | -0.000064 |
| 17            | 1             | 0           | -2.766123               | 4.966862  | -0.000057 |
| 18            | 6             | 0           | 1.450000                | -2.335140 | -1.170487 |
| 19            | 6             | 0           | 0.593281                | -3.395488 | -0.726027 |
| 20            | 6             | 0           | -0.566135               | -3.731694 | -1.423652 |
| 21            | 6             | 0           | -0.929338               | -2.975501 | -2.591980 |
| 22            | 6             | 0           | -0.111961               | -1.923684 | -3.001920 |
| 23            | 6             | 0           | 1.098939                | -1.609682 | -2.281355 |
| 24            | 6             | 0           | 2.265676                | -1.784589 | 0.000029  |
| 25            | 6             | 0           | 1.449989                | -2.335119 | 1.170547  |
| 26            | 6             | 0           | 0.593273                | -3.395474 | 0.726098  |
| 27            | 6             | 0           | -0.566150               | -3.731668 | 1.423717  |
| 28            | 6             | 0           | -1.780501               | -4.056343 | -0.693596 |
| 29            | 6             | 0           | -2.371324               | -2.818279 | -2.596366 |
| 30            | 6             | 0           | -2.937403               | -1.623382 | -3.026108 |
| 31            | 6             | 0           | -2.085844               | -0.533730 | -3.468166 |
| 32            | 6             | 0           | -0.707822               | -0.680398 | -3.449976 |
| 33            | 6             | 0           | 0.139959                | 0.410873  | -3.001446 |
| 34            | 6             | 0           | 1.250635                | -0.138738 | -2.284617 |
| 35            | 6             | 0           | 1.729462                | 0.509450  | -1.169083 |
| 36            | 6             | 0           | 2.419279                | -0.190321 | 0.000016  |
| 37            | 6             | 0           | 1.098916                | -1.609641 | 2.281398  |
| 38            | 6             | 0           | 1.250612                | -0.138697 | 2.284637  |
| 39            | 6             | 0           | 1.729451                | 0.509471  | 1.169096  |
| 40            | 6             | 0           | 1.122158                | 1.729719  | 0.738208  |
| 41            | 6             | 0           | 1.122165                | 1.729705  | -0.738224 |
| 42            | 6             | 0           | 0.075362                | 2.295828  | -1.435708 |
| 43            | 6             | 0           | -0.439603               | 1.606617  | -2.570346 |
| 44            | 6             | 0           | -1.882793               | 1.755893  | -2.576187 |
| 45            | 6             | 0           | -2.689386               | 0.713274  | -3.022231 |
| 46            | 6             | 0           | -2.899244               | -3.486677 | -1.420690 |
| 47            | 6             | 0           | -4.750299               | 0.465496  | -0.000028 |
| 48            | 6             | 0           | -4.915496               | -0.914235 | -0.000016 |
| 49            | 6             | 0           | -4.557038               | -1.687760 | 1.175516  |
| 50            | 6             | 0           | -4.052543               | -1.046845 | 2.301933  |
| 51            | 6             | 0           | -3.895130               | 0.396171  | 2.305638  |
| 52            | 6             | 0           | -3.393592               | 2.232578  | 0.741478  |
| 53            | 6             | 0           | -3.393584               | 2.232565  | -0.741552 |
| 54            | 6             | 0           | -4.229186               | 1.137351  | -1.174272 |
| 55            | 6             | 0           | -3.895106               | 0.396129  | -2.305684 |
| 56            | 6             | 0           | -4.052519               | -1.046887 | -2.301954 |
| 57            | 6             | 0           | -4.557026               | -1.687781 | -1.175531 |
| 58            | 6             | 0           | -3.968887               | -2.932272 | 0.726946  |
| 59            | 6             | 0           | -2.899259               | -3.486652 | 1.420726  |
| 60            | 6             | 0           | -2.371351               | -2.818232 | 2.596395  |
| 61            | 6             | 0           | -2.937435               | -1.623327 | 3.026110  |
| 62            | 6             | 0           | -2.085881               | -0.533667 | 3.468157  |
| 63            | 6             | 0           | -2.689418               | 0.713328  | 3.022192  |
| 64            | 6             | 0           | -1.882820               | 1.755939  | 2.576138  |
| 65            | 6             | 0           | -2.249649               | 2.546688  | 1.431966  |
| 66            | 6             | 0           | -2.249634               | 2.546663  | -1.432032 |
| 67            | 6             | 0           | -1.003471               | 3.166078  | -0.802842 |
| 68            | 6             | 0           | -1.003479               | 3.166093  | 0.802778  |
| 69            | 6             | 0           | 0.075346                | 2.295853  | 1.435670  |
| 70            | 6             | 0           | -0.439630               | 1.606664  | 2.570315  |
| 71            | 6             | 0           | 0.139927                | 0.410927  | 3.001443  |
| 72            | 6             | 0           | -0.707859               | -0.680335 | 3.449984  |
| 73            | 6             | 0           | -0.111993               | -1.923629 | 3.001957  |
| 74            | 6             | 0           | -0.929365               | -2.975454 | 2.592028  |
| 75            | 6             | 0           | -3.968880               | -2.932285 | -0.726932 |
| 76            | 6             | 0           | -1.780508               | -4.056330 | 0.693654  |
| 77            | 6             | 0           | -4.229199               | 1.137373  | 1.174210  |
| 78            | 6             | 0           | 3.969533                | 0.155378  | 0.000019  |
| 79            | 1             | 0           | 4.093221                | 1.242707  | 0.000012  |
| 80            | 6             | 0           | 4.555999                | -0.496681 | -1.228994 |
| 81            | 6             | 0           | 5.134851                | 0.154178  | -2.312081 |
| 82            | 1             | 0           | 5.222411                | 1.238361  | -2.315757 |
| 83            | 6             | 0           | 5.598289                | -0.600230 | -3.393027 |
| 84            | 1             | 0           | 6.058771                | -0.101592 | -4.241179 |
| 85            | 6             | 0           | 5.468535                | -1.988804 | -3.390928 |
| 86            | 1             | 0           | 5.826539                | -2.567401 | -4.237836 |
| 87            | 6             | 0           | 4.872876                | -2.640615 | -2.307969 |
| 88            | 1             | 0           | 4.757246                | -3.722103 | -2.309979 |

|    |   |   |          |           |           |
|----|---|---|----------|-----------|-----------|
| 89 | 6 | 0 | 4.423590 | -1.890342 | -1.228018 |
| 90 | 6 | 0 | 3.722235 | -2.419169 | 0.000036  |
| 91 | 1 | 0 | 3.639127 | -3.510179 | 0.000044  |
| 92 | 6 | 0 | 4.423587 | -1.890325 | 1.228085  |
| 93 | 6 | 0 | 4.872876 | -2.640584 | 2.308044  |
| 94 | 1 | 0 | 4.757247 | -3.722072 | 2.310067  |
| 95 | 6 | 0 | 5.468535 | -1.988759 | 3.390994  |

|     |   |   |          |           |          |
|-----|---|---|----------|-----------|----------|
| 96  | 1 | 0 | 5.826542 | -2.567345 | 4.237908 |
| 97  | 6 | 0 | 5.598287 | -0.600185 | 3.393076 |
| 98  | 1 | 0 | 6.058771 | -0.101536 | 4.241220 |
| 99  | 6 | 0 | 5.134848 | 0.154209  | 2.312121 |
| 100 | 1 | 0 | 5.222407 | 1.238392  | 2.315783 |
| 101 | 6 | 0 | 4.555994 | -0.496664 | 1.229042 |

---
